# Supplementary material
Source: publisher figshare collection journal article supplement (https://gsajournals.figshare.com/ndownloader/files/35373784)
Supplement: Supplementary file 1 [file 35373784]

## Sheet: Supplementary Table S12
Supplementary Table S12. Significant results from the genome-wide association study
Phenotype	Ames GWAS locus number	SNP ID	Chr	Position (bp)	P-value	FDR-adjusted P-values	MAF	R2LR from model without SNP	R2LR from model with SNP	SNP R2LR	Transformed effect estimates	GWAS SNP rank	GWAS SNP ranking %	Threshold	NAM JL-QTL CSI ID	NAM JL-QTL trait
αT		1_3851598	1	3851598	4.06e-05	0.0454205	0.238981	0.258323	0.266986	0.00866269	-0.111413	10890	0.0893736	FDR 5%
αT		1_67787537	1	67787537	4.17e-05	0.0464524	0.0289256	0.258323	0.26696	0.00863659	0.297459	10934	0.0897347	FDR 5%
αT		1_70976319	1	70976319	3.94e-05	0.0443514	0.0330579	0.258323	0.267014	0.00869082	0.278531	10837	0.0889386	FDR 5%	NAM_JL_4	δT, δT3, γT3, ΣT3, ΣTT3
αT		1_95341281	1	95341281	2.63e-07	0.000497741	0.0578512	0.258323	0.271999	0.0136754	-0.284219	6446	0.052902	FDR 5%	NAM_JL_4	δT, δT3, γT3, ΣT3, ΣTT3
αT		1_95375430	1	95375430	2.1e-06	0.0034571	0.0702479	0.258323	0.26992	0.0115964	-0.228505	7393	0.0606739	FDR 5%	NAM_JL_4	δT, δT3, γT3, ΣT3, ΣTT3
αT		1_95432932	1	95432932	1.61e-06	0.00270179	0.0578512	0.258323	0.270185	0.0118618	-0.26257	7251	0.0595085	FDR 5%	NAM_JL_4	δT, δT3, γT3, ΣT3, ΣTT3
αT		1_95444071	1	95444071	5.07e-06	0.00749177	0.0592287	0.258323	0.269041	0.0107181	-0.248791	8243	0.0676498	FDR 5%	NAM_JL_4	δT, δT3, γT3, ΣT3, ΣTT3
αT		1_95596683	1	95596683	2.43e-05	0.0292742	0.0599174	0.258323	0.26749	0.00916667	-0.224565	10121	0.0830625	FDR 5%	NAM_JL_4	δT, δT3, γT3, ΣT3, ΣTT3
αT		1_95618703	1	95618703	2.75e-05	0.0325363	0.0592287	0.258323	0.26737	0.00904651	-0.22704	10285	0.0844084	FDR 5%	NAM_JL_4	δT, δT3, γT3, ΣT3, ΣTT3
αT		1_95620925	1	95620925	2.75e-05	0.0325363	0.0592287	0.258323	0.26737	0.00904651	-0.22704	10286	0.0844166	FDR 5%	NAM_JL_4	δT, δT3, γT3, ΣT3, ΣTT3
αT		1_95628375	1	95628375	2.46e-05	0.0295297	0.0599174	0.258323	0.26748	0.00915704	-0.226969	10132	0.0831527	FDR 5%	NAM_JL_4	δT, δT3, γT3, ΣT3, ΣTT3
αT		1_95632191	1	95632191	2.75e-05	0.0325363	0.0592287	0.258323	0.26737	0.00904651	-0.22704	10287	0.0844248	FDR 5%	NAM_JL_4	δT, δT3, γT3, ΣT3, ΣTT3
αT		1_95651739	1	95651739	9.62e-06	0.0131385	0.0599174	0.258323	0.268406	0.0100823	-0.239636	8923	0.0732306	FDR 5%	NAM_JL_4	δT, δT3, γT3, ΣT3, ΣTT3
αT		1_95666315	1	95666315	3.1e-05	0.0361113	0.0585399	0.258323	0.26725	0.00892695	-0.23142	10466	0.0858939	FDR 5%	NAM_JL_4	δT, δT3, γT3, ΣT3, ΣTT3
αT		1_95967629	1	95967629	6.34e-06	0.00910542	0.0695592	0.258323	0.268819	0.0104954	-0.225565	8488	0.0696605	FDR 5%	NAM_JL_4	δT, δT3, γT3, ΣT3, ΣTT3
αT		1_95968031	1	95968031	1.59e-05	0.0203611	0.0661157	0.258323	0.26791	0.00958657	-0.221617	9432	0.0774079	FDR 5%	NAM_JL_4	δT, δT3, γT3, ΣT3, ΣTT3
αT		1_95981073	1	95981073	1.67e-05	0.0212505	0.0757576	0.258323	0.267859	0.00953545	-0.204738	9587	0.07868	FDR 5%	NAM_JL_4	δT, δT3, γT3, ΣT3, ΣTT3
αT		1_95981074	1	95981074	1.67e-05	0.0212505	0.0757576	0.258323	0.267859	0.00953545	-0.204738	9588	0.0786882	FDR 5%	NAM_JL_4	δT, δT3, γT3, ΣT3, ΣTT3
αT		1_95981219	1	95981219	1.67e-05	0.0212505	0.0757576	0.258323	0.267859	0.00953545	-0.204738	9589	0.0786964	FDR 5%	NAM_JL_4	δT, δT3, γT3, ΣT3, ΣTT3
αT		1_95981368	1	95981368	1.67e-05	0.0212505	0.0757576	0.258323	0.267859	0.00953545	-0.204738	9590	0.0787046	FDR 5%	NAM_JL_4	δT, δT3, γT3, ΣT3, ΣTT3
αT		1_95981962	1	95981962	1.59e-05	0.0203611	0.0661157	0.258323	0.26791	0.00958657	-0.221617	9433	0.0774161	FDR 5%	NAM_JL_4	δT, δT3, γT3, ΣT3, ΣTT3
αT		1_95982366	1	95982366	1.59e-05	0.0203611	0.0661157	0.258323	0.26791	0.00958657	-0.221617	9434	0.0774243	FDR 5%	NAM_JL_4	δT, δT3, γT3, ΣT3, ΣTT3
αT		1_95982894	1	95982894	3.3e-06	0.00518104	0.0612948	0.258323	0.269468	0.0111446	-0.24399	7763	0.0637105	FDR 5%	NAM_JL_4	δT, δT3, γT3, ΣT3, ΣTT3
αT		1_95983067	1	95983067	4.8e-06	0.00717656	0.0633609	0.258323	0.269096	0.0107723	-0.241588	8148	0.0668702	FDR 5%	NAM_JL_4	δT, δT3, γT3, ΣT3, ΣTT3
αT		1_95983076	1	95983076	1.67e-05	0.0212505	0.0757576	0.258323	0.267859	0.00953545	-0.204738	9591	0.0787128	FDR 5%	NAM_JL_4	δT, δT3, γT3, ΣT3, ΣTT3
αT		1_95983087	1	95983087	6.05e-06	0.00872501	0.065427	0.258323	0.268866	0.0105424	-0.233911	8447	0.069324	FDR 5%	NAM_JL_4	δT, δT3, γT3, ΣT3, ΣTT3
αT		1_95983105	1	95983105	4.12e-05	0.045961	0.0619835	0.258323	0.266972	0.00864863	-0.209492	10916	0.089587	FDR 5%	NAM_JL_4	δT, δT3, γT3, ΣT3, ΣTT3
αT		1_95983127	1	95983127	4.12e-05	0.045961	0.0619835	0.258323	0.266972	0.00864863	-0.209492	10917	0.0895952	FDR 5%	NAM_JL_4	δT, δT3, γT3, ΣT3, ΣTT3
αT		1_95983155	1	95983155	1.59e-05	0.0203611	0.0661157	0.258323	0.26791	0.00958657	-0.221617	9435	0.0774325	FDR 5%	NAM_JL_4	δT, δT3, γT3, ΣT3, ΣTT3
αT		1_95983174	1	95983174	1.59e-05	0.0203611	0.0661157	0.258323	0.26791	0.00958657	-0.221617	9436	0.0774407	FDR 5%	NAM_JL_4	δT, δT3, γT3, ΣT3, ΣTT3
αT		1_95983177	1	95983177	4.24e-05	0.0471172	0.065427	0.258323	0.266944	0.0086204	-0.210103	10960	0.0899481	FDR 5%	NAM_JL_4	δT, δT3, γT3, ΣT3, ΣTT3
αT		1_95983244	1	95983244	1.59e-05	0.0203611	0.0661157	0.258323	0.26791	0.00958657	-0.221617	9437	0.0774489	FDR 5%	NAM_JL_4	δT, δT3, γT3, ΣT3, ΣTT3
αT		1_95983308	1	95983308	1.59e-05	0.0203611	0.0661157	0.258323	0.26791	0.00958657	-0.221617	9438	0.0774571	FDR 5%	NAM_JL_4	δT, δT3, γT3, ΣT3, ΣTT3
αT		1_95983314	1	95983314	1.59e-05	0.0203611	0.0661157	0.258323	0.26791	0.00958657	-0.221617	9439	0.0774653	FDR 5%	NAM_JL_4	δT, δT3, γT3, ΣT3, ΣTT3
αT		1_95983327	1	95983327	1.59e-05	0.0203611	0.0661157	0.258323	0.26791	0.00958657	-0.221617	9440	0.0774735	FDR 5%	NAM_JL_4	δT, δT3, γT3, ΣT3, ΣTT3
αT		1_95983357	1	95983357	1.59e-05	0.0203611	0.0661157	0.258323	0.26791	0.00958657	-0.221617	9441	0.0774817	FDR 5%	NAM_JL_4	δT, δT3, γT3, ΣT3, ΣTT3
αT		1_95983403	1	95983403	1.59e-05	0.0203611	0.0661157	0.258323	0.26791	0.00958657	-0.221617	9442	0.07749	FDR 5%	NAM_JL_4	δT, δT3, γT3, ΣT3, ΣTT3
αT		1_95983406	1	95983406	1.59e-05	0.0203611	0.0661157	0.258323	0.26791	0.00958657	-0.221617	9443	0.0774982	FDR 5%	NAM_JL_4	δT, δT3, γT3, ΣT3, ΣTT3
αT		1_95983515	1	95983515	1.59e-05	0.0203611	0.0661157	0.258323	0.26791	0.00958657	-0.221617	9444	0.0775064	FDR 5%	NAM_JL_4	δT, δT3, γT3, ΣT3, ΣTT3
αT		1_95983521	1	95983521	1.59e-05	0.0203611	0.0661157	0.258323	0.26791	0.00958657	-0.221617	9445	0.0775146	FDR 5%	NAM_JL_4	δT, δT3, γT3, ΣT3, ΣTT3
αT		1_95983543	1	95983543	1.59e-05	0.0203611	0.0661157	0.258323	0.26791	0.00958657	-0.221617	9446	0.0775228	FDR 5%	NAM_JL_4	δT, δT3, γT3, ΣT3, ΣTT3
αT		1_95983590	1	95983590	1.59e-05	0.0203611	0.0661157	0.258323	0.26791	0.00958657	-0.221617	9447	0.077531	FDR 5%	NAM_JL_4	δT, δT3, γT3, ΣT3, ΣTT3
αT		1_95983603	1	95983603	1.59e-05	0.0203611	0.0661157	0.258323	0.26791	0.00958657	-0.221617	9448	0.0775392	FDR 5%	NAM_JL_4	δT, δT3, γT3, ΣT3, ΣTT3
αT		1_95984642	1	95984642	1.67e-05	0.0212505	0.0757576	0.258323	0.267859	0.00953545	-0.204738	9592	0.078721	FDR 5%	NAM_JL_4	δT, δT3, γT3, ΣT3, ΣTT3
αT		1_95984668	1	95984668	1.59e-05	0.0203611	0.0661157	0.258323	0.26791	0.00958657	-0.221617	9449	0.0775474	FDR 5%	NAM_JL_4	δT, δT3, γT3, ΣT3, ΣTT3
αT		1_95984867	1	95984867	1.59e-05	0.0203611	0.0661157	0.258323	0.26791	0.00958657	-0.221617	9450	0.0775556	FDR 5%	NAM_JL_4	δT, δT3, γT3, ΣT3, ΣTT3
αT		1_95984976	1	95984976	1.59e-05	0.0203611	0.0661157	0.258323	0.26791	0.00958657	-0.221617	9451	0.0775638	FDR 5%	NAM_JL_4	δT, δT3, γT3, ΣT3, ΣTT3
αT		1_95985889	1	95985889	1.45e-05	0.0188802	0.0702479	0.258323	0.268002	0.00967876	-0.216077	9338	0.0766364	FDR 5%	NAM_JL_4	δT, δT3, γT3, ΣT3, ΣTT3
αT		1_95985908	1	95985908	1.66e-05	0.021069	0.0674931	0.258323	0.267868	0.00954517	-0.220517	9568	0.078524	FDR 5%	NAM_JL_4	δT, δT3, γT3, ΣT3, ΣTT3
αT		1_95985913	1	95985913	1.66e-05	0.021069	0.0674931	0.258323	0.267868	0.00954517	-0.220517	9569	0.0785322	FDR 5%	NAM_JL_4	δT, δT3, γT3, ΣT3, ΣTT3
αT		1_95985949	1	95985949	1.66e-05	0.021069	0.0674931	0.258323	0.267868	0.00954517	-0.220517	9570	0.0785404	FDR 5%	NAM_JL_4	δT, δT3, γT3, ΣT3, ΣTT3
αT		1_95986005	1	95986005	1.66e-05	0.021069	0.0674931	0.258323	0.267868	0.00954517	-0.220517	9571	0.0785487	FDR 5%	NAM_JL_4	δT, δT3, γT3, ΣT3, ΣTT3
αT		1_95986014	1	95986014	4.53e-05	0.0497805	0.0668044	0.258323	0.266878	0.0085547	-0.20821	11088	0.0909986	FDR 5%	NAM_JL_4	δT, δT3, γT3, ΣT3, ΣTT3
αT		1_95986018	1	95986018	4.53e-05	0.0497805	0.0668044	0.258323	0.266878	0.0085547	-0.20821	11089	0.0910068	FDR 5%	NAM_JL_4	δT, δT3, γT3, ΣT3, ΣTT3
αT		1_95986045	1	95986045	1.66e-05	0.021069	0.0674931	0.258323	0.267868	0.00954517	-0.220517	9572	0.0785569	FDR 5%	NAM_JL_4	δT, δT3, γT3, ΣT3, ΣTT3
αT		1_95986677	1	95986677	4.53e-05	0.0497805	0.0668044	0.258323	0.266878	0.0085547	-0.20821	11090	0.091015	FDR 5%	NAM_JL_4	δT, δT3, γT3, ΣT3, ΣTT3
αT		1_95986780	1	95986780	1.66e-05	0.021069	0.0674931	0.258323	0.267868	0.00954517	-0.220517	9573	0.0785651	FDR 5%	NAM_JL_4	δT, δT3, γT3, ΣT3, ΣTT3
αT		1_95986847	1	95986847	1.59e-05	0.0203611	0.0661157	0.258323	0.26791	0.00958657	-0.221617	9452	0.077572	FDR 5%	NAM_JL_4	δT, δT3, γT3, ΣT3, ΣTT3
αT		1_95986867	1	95986867	1.59e-05	0.0203611	0.0661157	0.258323	0.26791	0.00958657	-0.221617	9453	0.0775802	FDR 5%	NAM_JL_4	δT, δT3, γT3, ΣT3, ΣTT3
αT		1_95986873	1	95986873	1.59e-05	0.0203611	0.0661157	0.258323	0.26791	0.00958657	-0.221617	9454	0.0775884	FDR 5%	NAM_JL_4	δT, δT3, γT3, ΣT3, ΣTT3
αT		1_95986890	1	95986890	1.59e-05	0.0203611	0.0661157	0.258323	0.26791	0.00958657	-0.221617	9455	0.0775966	FDR 5%	NAM_JL_4	δT, δT3, γT3, ΣT3, ΣTT3
αT		1_95986949	1	95986949	1.59e-05	0.0203611	0.0661157	0.258323	0.26791	0.00958657	-0.221617	9456	0.0776049	FDR 5%	NAM_JL_4	δT, δT3, γT3, ΣT3, ΣTT3
αT		1_95986968	1	95986968	9e-06	0.0123715	0.0661157	0.258323	0.268472	0.0101487	-0.230547	8862	0.0727299	FDR 5%	NAM_JL_4	δT, δT3, γT3, ΣT3, ΣTT3
αT		1_95986990	1	95986990	1.66e-05	0.021069	0.0674931	0.258323	0.267868	0.00954517	-0.220517	9574	0.0785733	FDR 5%	NAM_JL_4	δT, δT3, γT3, ΣT3, ΣTT3
αT		1_95986992	1	95986992	1.05e-05	0.0142565	0.0681818	0.258323	0.268315	0.00999188	-0.221412	9010	0.0739446	FDR 5%	NAM_JL_4	δT, δT3, γT3, ΣT3, ΣTT3
αT		1_95987229	1	95987229	1.26e-05	0.0166627	0.0592287	0.258323	0.26814	0.00981674	-0.232139	9201	0.0755121	FDR 5%	NAM_JL_4	δT, δT3, γT3, ΣT3, ΣTT3
αT		1_95988600	1	95988600	1.19e-05	0.0158795	0.0750689	0.258323	0.268192	0.00986845	-0.209576	9164	0.0752084	FDR 5%	NAM_JL_4	δT, δT3, γT3, ΣT3, ΣTT3
αT		1_95988620	1	95988620	1.59e-05	0.0203611	0.0661157	0.258323	0.26791	0.00958657	-0.221617	9457	0.0776131	FDR 5%	NAM_JL_4	δT, δT3, γT3, ΣT3, ΣTT3
αT		1_95988637	1	95988637	1.59e-05	0.0203611	0.0661157	0.258323	0.26791	0.00958657	-0.221617	9458	0.0776213	FDR 5%	NAM_JL_4	δT, δT3, γT3, ΣT3, ΣTT3
αT		1_95988697	1	95988697	6.22e-06	0.00894556	0.0599174	0.258323	0.268838	0.0105144	-0.220095	8468	0.0694964	FDR 5%	NAM_JL_4	δT, δT3, γT3, ΣT3, ΣTT3
αT		1_95988723	1	95988723	2.46e-06	0.00399516	0.0606061	0.258323	0.269759	0.0114358	-0.228715	7511	0.0616423	FDR 5%	NAM_JL_4	δT, δT3, γT3, ΣT3, ΣTT3
αT		1_95988724	1	95988724	2.46e-06	0.00399516	0.0606061	0.258323	0.269759	0.0114358	-0.228715	7512	0.0616506	FDR 5%	NAM_JL_4	δT, δT3, γT3, ΣT3, ΣTT3
αT		1_95988750	1	95988750	2.46e-06	0.00399516	0.0606061	0.258323	0.269759	0.0114358	-0.228715	7513	0.0616588	FDR 5%	NAM_JL_4	δT, δT3, γT3, ΣT3, ΣTT3
αT		1_95988815	1	95988815	1.59e-05	0.0203611	0.0661157	0.258323	0.26791	0.00958657	-0.221617	9459	0.0776295	FDR 5%	NAM_JL_4	δT, δT3, γT3, ΣT3, ΣTT3
αT		1_95988863	1	95988863	3.76e-05	0.0426475	0.0991736	0.258323	0.26706	0.00873669	-0.164792	10756	0.0882739	FDR 5%	NAM_JL_4	δT, δT3, γT3, ΣT3, ΣTT3
αT		1_95988908	1	95988908	6.22e-06	0.00894556	0.0599174	0.258323	0.268838	0.0105144	-0.220095	8469	0.0695046	FDR 5%	NAM_JL_4	δT, δT3, γT3, ΣT3, ΣTT3
αT		1_95988920	1	95988920	1.5e-05	0.0195087	0.0606061	0.258323	0.267965	0.00964219	-0.209569	9378	0.0769647	FDR 5%	NAM_JL_4	δT, δT3, γT3, ΣT3, ΣTT3
αT		1_95989626	1	95989626	2.46e-06	0.00399516	0.0606061	0.258323	0.269759	0.0114358	-0.228715	7514	0.061667	FDR 5%	NAM_JL_4	δT, δT3, γT3, ΣT3, ΣTT3
αT		1_95989719	1	95989719	2.46e-06	0.00399516	0.0606061	0.258323	0.269759	0.0114358	-0.228715	7515	0.0616752	FDR 5%	NAM_JL_4	δT, δT3, γT3, ΣT3, ΣTT3
αT		1_95990750	1	95990750	6.05e-06	0.00872501	0.065427	0.258323	0.268866	0.0105424	-0.233911	8448	0.0693323	FDR 5%	NAM_JL_4	δT, δT3, γT3, ΣT3, ΣTT3
αT		1_95990804	1	95990804	1.59e-05	0.0203611	0.0661157	0.258323	0.26791	0.00958657	-0.221617	9460	0.0776377	FDR 5%	NAM_JL_4	δT, δT3, γT3, ΣT3, ΣTT3
αT		1_95990805	1	95990805	2.31e-05	0.0280792	0.0764463	0.258323	0.267539	0.00921593	-0.196057	10037	0.0823731	FDR 5%	NAM_JL_4	δT, δT3, γT3, ΣT3, ΣTT3
αT		1_95990873	1	95990873	4.51e-05	0.0495528	0.0626722	0.258323	0.266884	0.00856034	-0.206876	11078	0.0909165	FDR 5%	NAM_JL_4	δT, δT3, γT3, ΣT3, ΣTT3
αT		1_95990878	1	95990878	4.51e-05	0.0495528	0.0626722	0.258323	0.266884	0.00856034	-0.206876	11079	0.0909247	FDR 5%	NAM_JL_4	δT, δT3, γT3, ΣT3, ΣTT3
αT		1_95991078	1	95991078	8.59e-06	0.0119016	0.0647383	0.258323	0.268518	0.0101947	-0.231739	8794	0.0721719	FDR 5%	NAM_JL_4	δT, δT3, γT3, ΣT3, ΣTT3
αT		1_95991758	1	95991758	1.59e-05	0.0203611	0.0661157	0.258323	0.26791	0.00958657	-0.221617	9461	0.0776459	FDR 5%	NAM_JL_4	δT, δT3, γT3, ΣT3, ΣTT3
αT		1_95991759	1	95991759	1.59e-05	0.0203611	0.0661157	0.258323	0.26791	0.00958657	-0.221617	9462	0.0776541	FDR 5%	NAM_JL_4	δT, δT3, γT3, ΣT3, ΣTT3
αT		1_95992134	1	95992134	1.59e-05	0.0203611	0.0661157	0.258323	0.26791	0.00958657	-0.221617	9463	0.0776623	FDR 5%	NAM_JL_4	δT, δT3, γT3, ΣT3, ΣTT3
αT		1_95992246	1	95992246	3.11e-05	0.0362109	0.0716253	0.258323	0.267247	0.008924	-0.195551	10470	0.0859267	FDR 5%	NAM_JL_4	δT, δT3, γT3, ΣT3, ΣTT3
αT		1_95992271	1	95992271	2.33e-05	0.0282506	0.0674931	0.258323	0.267532	0.00920925	-0.214236	10044	0.0824305	FDR 5%	NAM_JL_4	δT, δT3, γT3, ΣT3, ΣTT3
αT		1_95992473	1	95992473	1.59e-05	0.0203611	0.0661157	0.258323	0.26791	0.00958657	-0.221617	9464	0.0776705	FDR 5%	NAM_JL_4	δT, δT3, γT3, ΣT3, ΣTT3
αT		1_95992535	1	95992535	1.59e-05	0.0203611	0.0661157	0.258323	0.26791	0.00958657	-0.221617	9465	0.0776787	FDR 5%	NAM_JL_4	δT, δT3, γT3, ΣT3, ΣTT3
αT		1_95992574	1	95992574	1.59e-05	0.0203611	0.0661157	0.258323	0.26791	0.00958657	-0.221617	9466	0.0776869	FDR 5%	NAM_JL_4	δT, δT3, γT3, ΣT3, ΣTT3
αT		1_95992677	1	95992677	1.08e-05	0.0145813	0.0668044	0.258323	0.268289	0.00996565	-0.223689	9045	0.0742318	FDR 5%	NAM_JL_4	δT, δT3, γT3, ΣT3, ΣTT3
αT		1_95992978	1	95992978	1.59e-05	0.0203611	0.0661157	0.258323	0.26791	0.00958657	-0.221617	9467	0.0776951	FDR 5%	NAM_JL_4	δT, δT3, γT3, ΣT3, ΣTT3
αT		1_95993088	1	95993088	3.44e-05	0.0393846	0.0674931	0.258323	0.267149	0.00882575	-0.207752	10638	0.0873055	FDR 5%	NAM_JL_4	δT, δT3, γT3, ΣT3, ΣTT3
αT		1_95993093	1	95993093	1.79e-05	0.0224974	0.0702479	0.258323	0.267793	0.00946987	-0.212311	9682	0.0794596	FDR 5%	NAM_JL_4	δT, δT3, γT3, ΣT3, ΣTT3
αT		1_95994096	1	95994096	3.03e-05	0.0354219	0.0764463	0.258323	0.267272	0.00894887	-0.197313	10436	0.0856477	FDR 5%	NAM_JL_4	δT, δT3, γT3, ΣT3, ΣTT3
αT		1_95994151	1	95994151	1.59e-05	0.0203611	0.0661157	0.258323	0.26791	0.00958657	-0.221617	9468	0.0777033	FDR 5%	NAM_JL_4	δT, δT3, γT3, ΣT3, ΣTT3
αT		1_95994163	1	95994163	1.59e-05	0.0203611	0.0661157	0.258323	0.26791	0.00958657	-0.221617	9469	0.0777115	FDR 5%	NAM_JL_4	δT, δT3, γT3, ΣT3, ΣTT3
αT		1_95994187	1	95994187	1.79e-05	0.0224974	0.0702479	0.258323	0.267793	0.00946987	-0.212311	9683	0.0794678	FDR 5%	NAM_JL_4	δT, δT3, γT3, ΣT3, ΣTT3
αT		1_95994192	1	95994192	1.59e-05	0.0203611	0.0661157	0.258323	0.26791	0.00958657	-0.221617	9470	0.0777198	FDR 5%	NAM_JL_4	δT, δT3, γT3, ΣT3, ΣTT3
αT		1_95994200	1	95994200	1.59e-05	0.0203611	0.0661157	0.258323	0.26791	0.00958657	-0.221617	9471	0.077728	FDR 5%	NAM_JL_4	δT, δT3, γT3, ΣT3, ΣTT3
αT		1_95994206	1	95994206	1.59e-05	0.0203611	0.0661157	0.258323	0.26791	0.00958657	-0.221617	9472	0.0777362	FDR 5%	NAM_JL_4	δT, δT3, γT3, ΣT3, ΣTT3
αT		1_95994395	1	95994395	4.44e-06	0.00669902	0.0750689	0.258323	0.269173	0.0108496	-0.21999	8076	0.0662793	FDR 5%	NAM_JL_4	δT, δT3, γT3, ΣT3, ΣTT3
αT		1_95994415	1	95994415	1.59e-05	0.0203611	0.0661157	0.258323	0.26791	0.00958657	-0.221617	9473	0.0777444	FDR 5%	NAM_JL_4	δT, δT3, γT3, ΣT3, ΣTT3
αT		1_95994458	1	95994458	6.79e-06	0.00966981	0.0812672	0.258323	0.268752	0.0104285	-0.205254	8549	0.0701612	FDR 5%	NAM_JL_4	δT, δT3, γT3, ΣT3, ΣTT3
αT		1_95994588	1	95994588	1.59e-05	0.0203611	0.0661157	0.258323	0.26791	0.00958657	-0.221617	9474	0.0777526	FDR 5%	NAM_JL_4	δT, δT3, γT3, ΣT3, ΣTT3
αT		1_95994589	1	95994589	1.08e-05	0.0145813	0.0668044	0.258323	0.268289	0.00996565	-0.223689	9046	0.07424	FDR 5%	NAM_JL_4	δT, δT3, γT3, ΣT3, ΣTT3
αT		1_95994692	1	95994692	1.59e-05	0.0203611	0.0661157	0.258323	0.26791	0.00958657	-0.221617	9475	0.0777608	FDR 5%	NAM_JL_4	δT, δT3, γT3, ΣT3, ΣTT3
αT		1_95994727	1	95994727	1.59e-05	0.0203611	0.0661157	0.258323	0.26791	0.00958657	-0.221617	9476	0.077769	FDR 5%	NAM_JL_4	δT, δT3, γT3, ΣT3, ΣTT3
αT		1_95996869	1	95996869	1.59e-05	0.0203611	0.0661157	0.258323	0.26791	0.00958657	-0.221617	9477	0.0777772	FDR 5%	NAM_JL_4	δT, δT3, γT3, ΣT3, ΣTT3
αT		1_95996897	1	95996897	1.59e-05	0.0203611	0.0661157	0.258323	0.26791	0.00958657	-0.221617	9478	0.0777854	FDR 5%	NAM_JL_4	δT, δT3, γT3, ΣT3, ΣTT3
αT		1_95997056	1	95997056	1.59e-05	0.0203611	0.0661157	0.258323	0.26791	0.00958657	-0.221617	9479	0.0777936	FDR 5%	NAM_JL_4	δT, δT3, γT3, ΣT3, ΣTT3
αT		1_95997058	1	95997058	1.59e-05	0.0203611	0.0661157	0.258323	0.26791	0.00958657	-0.221617	9480	0.0778018	FDR 5%	NAM_JL_4	δT, δT3, γT3, ΣT3, ΣTT3
αT		1_95997101	1	95997101	1.28e-05	0.0169114	0.0736915	0.258323	0.268123	0.00980006	-0.205787	9221	0.0756762	FDR 5%	NAM_JL_4	δT, δT3, γT3, ΣT3, ΣTT3
αT		1_95997127	1	95997127	1.59e-05	0.0203611	0.0661157	0.258323	0.26791	0.00958657	-0.221617	9481	0.07781	FDR 5%	NAM_JL_4	δT, δT3, γT3, ΣT3, ΣTT3
αT		1_95997163	1	95997163	1.59e-05	0.0203611	0.0661157	0.258323	0.26791	0.00958657	-0.221617	9482	0.0778182	FDR 5%	NAM_JL_4	δT, δT3, γT3, ΣT3, ΣTT3
αT		1_95997224	1	95997224	1.59e-05	0.0203611	0.0661157	0.258323	0.26791	0.00958657	-0.221617	9483	0.0778264	FDR 5%	NAM_JL_4	δT, δT3, γT3, ΣT3, ΣTT3
αT		1_95997364	1	95997364	1.59e-05	0.0203611	0.0661157	0.258323	0.26791	0.00958657	-0.221617	9484	0.0778346	FDR 5%	NAM_JL_4	δT, δT3, γT3, ΣT3, ΣTT3
αT		1_95997372	1	95997372	1.59e-05	0.0203611	0.0661157	0.258323	0.26791	0.00958657	-0.221617	9485	0.0778429	FDR 5%	NAM_JL_4	δT, δT3, γT3, ΣT3, ΣTT3
αT		1_95997565	1	95997565	1.42e-05	0.0185603	0.0674931	0.258323	0.268021	0.00969776	-0.219228	9318	0.0764723	FDR 5%	NAM_JL_4	δT, δT3, γT3, ΣT3, ΣTT3
αT		1_95997580	1	95997580	1.59e-05	0.0203611	0.0661157	0.258323	0.26791	0.00958657	-0.221617	9486	0.0778511	FDR 5%	NAM_JL_4	δT, δT3, γT3, ΣT3, ΣTT3
αT		1_95997596	1	95997596	1.59e-05	0.0203611	0.0661157	0.258323	0.26791	0.00958657	-0.221617	9487	0.0778593	FDR 5%	NAM_JL_4	δT, δT3, γT3, ΣT3, ΣTT3
αT		1_95997626	1	95997626	1.59e-05	0.0203611	0.0661157	0.258323	0.26791	0.00958657	-0.221617	9488	0.0778675	FDR 5%	NAM_JL_4	δT, δT3, γT3, ΣT3, ΣTT3
αT		1_95997657	1	95997657	1.59e-05	0.0203611	0.0661157	0.258323	0.26791	0.00958657	-0.221617	9489	0.0778757	FDR 5%	NAM_JL_4	δT, δT3, γT3, ΣT3, ΣTT3
αT		1_95997961	1	95997961	1.59e-05	0.0203611	0.0661157	0.258323	0.26791	0.00958657	-0.221617	9490	0.0778839	FDR 5%	NAM_JL_4	δT, δT3, γT3, ΣT3, ΣTT3
αT		1_95998057	1	95998057	7.61e-06	0.010678	0.0640496	0.258323	0.268638	0.0103151	-0.234986	8671	0.0711624	FDR 5%	NAM_JL_4	δT, δT3, γT3, ΣT3, ΣTT3
αT		1_95998312	1	95998312	6.42e-06	0.0092084	0.077135	0.258323	0.268806	0.0104833	-0.212578	8496	0.0697262	FDR 5%	NAM_JL_4	δT, δT3, γT3, ΣT3, ΣTT3
αT		1_95998488	1	95998488	7.61e-06	0.010678	0.0640496	0.258323	0.268638	0.0103151	-0.234986	8672	0.0711706	FDR 5%	NAM_JL_4	δT, δT3, γT3, ΣT3, ΣTT3
αT		1_95998565	1	95998565	8.82e-06	0.0121535	0.0736915	0.258323	0.268491	0.0101681	-0.215365	8845	0.0725904	FDR 5%	NAM_JL_4	δT, δT3, γT3, ΣT3, ΣTT3
αT		1_95998572	1	95998572	7.61e-06	0.010678	0.0640496	0.258323	0.268638	0.0103151	-0.234986	8673	0.0711788	FDR 5%	NAM_JL_4	δT, δT3, γT3, ΣT3, ΣTT3
αT		1_95998645	1	95998645	8.82e-06	0.0121535	0.0736915	0.258323	0.268491	0.0101681	-0.215365	8846	0.0725986	FDR 5%	NAM_JL_4	δT, δT3, γT3, ΣT3, ΣTT3
αT		1_95998705	1	95998705	7.61e-06	0.010678	0.0640496	0.258323	0.268638	0.0103151	-0.234986	8674	0.071187	FDR 5%	NAM_JL_4	δT, δT3, γT3, ΣT3, ΣTT3
αT		1_95998741	1	95998741	7.61e-06	0.010678	0.0640496	0.258323	0.268638	0.0103151	-0.234986	8675	0.0711952	FDR 5%	NAM_JL_4	δT, δT3, γT3, ΣT3, ΣTT3
αT		1_95998818	1	95998818	7.61e-06	0.010678	0.0640496	0.258323	0.268638	0.0103151	-0.234986	8676	0.0712034	FDR 5%	NAM_JL_4	δT, δT3, γT3, ΣT3, ΣTT3
αT		1_95999077	1	95999077	7.61e-06	0.010678	0.0640496	0.258323	0.268638	0.0103151	-0.234986	8677	0.0712116	FDR 5%	NAM_JL_4	δT, δT3, γT3, ΣT3, ΣTT3
αT		1_95999665	1	95999665	7.61e-06	0.010678	0.0640496	0.258323	0.268638	0.0103151	-0.234986	8678	0.0712199	FDR 5%	NAM_JL_4	δT, δT3, γT3, ΣT3, ΣTT3
αT		1_95999755	1	95999755	7.61e-06	0.010678	0.0640496	0.258323	0.268638	0.0103151	-0.234986	8679	0.0712281	FDR 5%	NAM_JL_4	δT, δT3, γT3, ΣT3, ΣTT3
αT		1_96032305	1	96032305	6.81e-06	0.00970124	0.0633609	0.258323	0.268748	0.0104247	-0.24168	8553	0.070194	FDR 5%	NAM_JL_4	δT, δT3, γT3, ΣT3, ΣTT3
αT		1_96032320	1	96032320	1.03e-05	0.0139865	0.0743802	0.258323	0.268337	0.0100134	-0.214506	8986	0.0737476	FDR 5%	NAM_JL_4	δT, δT3, γT3, ΣT3, ΣTT3
αT		1_96032409	1	96032409	6.81e-06	0.00970124	0.0633609	0.258323	0.268748	0.0104247	-0.24168	8554	0.0702022	FDR 5%	NAM_JL_4	δT, δT3, γT3, ΣT3, ΣTT3
αT		1_96032429	1	96032429	6.81e-06	0.00970124	0.0633609	0.258323	0.268748	0.0104247	-0.24168	8555	0.0702104	FDR 5%	NAM_JL_4	δT, δT3, γT3, ΣT3, ΣTT3
αT		1_96032603	1	96032603	1.7e-06	0.00283516	0.0626722	0.258323	0.270132	0.0118088	-0.258244	7282	0.059763	FDR 5%	NAM_JL_4	δT, δT3, γT3, ΣT3, ΣTT3
αT		1_96032612	1	96032612	1.7e-06	0.00283516	0.0626722	0.258323	0.270132	0.0118088	-0.258244	7283	0.0597712	FDR 5%	NAM_JL_4	δT, δT3, γT3, ΣT3, ΣTT3
αT		1_96032647	1	96032647	1.7e-06	0.00283516	0.0626722	0.258323	0.270132	0.0118088	-0.258244	7284	0.0597794	FDR 5%	NAM_JL_4	δT, δT3, γT3, ΣT3, ΣTT3
αT		1_96041087	1	96041087	1.7e-06	0.00283516	0.0626722	0.258323	0.270132	0.0118088	-0.258244	7285	0.0597876	FDR 5%	NAM_JL_4	δT, δT3, γT3, ΣT3, ΣTT3
αT		1_96041119	1	96041119	1.7e-06	0.00283516	0.0626722	0.258323	0.270132	0.0118088	-0.258244	7286	0.0597958	FDR 5%	NAM_JL_4	δT, δT3, γT3, ΣT3, ΣTT3
αT		1_96041124	1	96041124	1.7e-06	0.00283516	0.0626722	0.258323	0.270132	0.0118088	-0.258244	7287	0.059804	FDR 5%	NAM_JL_4	δT, δT3, γT3, ΣT3, ΣTT3
αT		1_96041153	1	96041153	2.59e-06	0.00418713	0.0619835	0.258323	0.269708	0.0113848	-0.251233	7547	0.0619378	FDR 5%	NAM_JL_4	δT, δT3, γT3, ΣT3, ΣTT3
αT		1_96043200	1	96043200	2.58e-07	0.000487184	0.0571625	0.258323	0.272021	0.0136978	-0.261058	6442	0.0528691	FDR 5%	NAM_JL_4	δT, δT3, γT3, ΣT3, ΣTT3
αT		1_96043405	1	96043405	4.27e-07	0.000783552	0.0564738	0.258323	0.271513	0.0131896	-0.258059	6641	0.0545023	FDR 5%	NAM_JL_4	δT, δT3, γT3, ΣT3, ΣTT3
αT		1_96052350	1	96052350	2.84e-06	0.00454193	0.0619835	0.258323	0.269619	0.011296	-0.2546	7606	0.062422	FDR 5%	NAM_JL_4	δT, δT3, γT3, ΣT3, ΣTT3
αT		1_96052361	1	96052361	2.73e-06	0.00438243	0.0626722	0.258323	0.269658	0.0113349	-0.253125	7576	0.0621758	FDR 5%	NAM_JL_4	δT, δT3, γT3, ΣT3, ΣTT3
αT		1_96052362	1	96052362	2.73e-06	0.00438243	0.0626722	0.258323	0.269658	0.0113349	-0.253125	7577	0.062184	FDR 5%	NAM_JL_4	δT, δT3, γT3, ΣT3, ΣTT3
αT		1_96052363	1	96052363	1.72e-05	0.0217249	0.0633609	0.258323	0.267833	0.00951028	-0.230296	9625	0.0789918	FDR 5%	NAM_JL_4	δT, δT3, γT3, ΣT3, ΣTT3
αT		1_96052411	1	96052411	2.73e-06	0.00438243	0.0626722	0.258323	0.269658	0.0113349	-0.253125	7578	0.0621922	FDR 5%	NAM_JL_4	δT, δT3, γT3, ΣT3, ΣTT3
αT		1_96052439	1	96052439	2.73e-06	0.00438243	0.0626722	0.258323	0.269658	0.0113349	-0.253125	7579	0.0622004	FDR 5%	NAM_JL_4	δT, δT3, γT3, ΣT3, ΣTT3
αT		1_96052480	1	96052480	4.89e-06	0.00727424	0.0633609	0.258323	0.269076	0.010753	-0.243832	8196	0.0672641	FDR 5%	NAM_JL_4	δT, δT3, γT3, ΣT3, ΣTT3
αT		1_96052527	1	96052527	2.73e-06	0.00438243	0.0626722	0.258323	0.269658	0.0113349	-0.253125	7580	0.0622086	FDR 5%	NAM_JL_4	δT, δT3, γT3, ΣT3, ΣTT3
αT		1_96052564	1	96052564	2.73e-06	0.00438243	0.0626722	0.258323	0.269658	0.0113349	-0.253125	7581	0.0622168	FDR 5%	NAM_JL_4	δT, δT3, γT3, ΣT3, ΣTT3
αT		1_96052618	1	96052618	8.99e-06	0.0123682	0.0640496	0.258323	0.268472	0.0101491	-0.235779	8861	0.0727217	FDR 5%	NAM_JL_4	δT, δT3, γT3, ΣT3, ΣTT3
αT		1_96052803	1	96052803	3.31e-05	0.0382334	0.0668044	0.258323	0.267186	0.0088628	-0.206676	10549	0.086575	FDR 5%	NAM_JL_4	δT, δT3, γT3, ΣT3, ΣTT3
αT		1_96052816	1	96052816	3.31e-05	0.0382334	0.0668044	0.258323	0.267186	0.0088628	-0.206676	10550	0.0865832	FDR 5%	NAM_JL_4	δT, δT3, γT3, ΣT3, ΣTT3
αT		1_96052863	1	96052863	3.12e-05	0.0362858	0.0674931	0.258323	0.267245	0.00892178	-0.206071	10472	0.0859431	FDR 5%	NAM_JL_4	δT, δT3, γT3, ΣT3, ΣTT3
αT		1_96052902	1	96052902	2.91e-06	0.00465181	0.0640496	0.258323	0.269592	0.0112687	-0.251488	7633	0.0626436	FDR 5%	NAM_JL_4	δT, δT3, γT3, ΣT3, ΣTT3
αT		1_96053259	1	96053259	1.13e-05	0.0151575	0.0626722	0.258323	0.268245	0.00992174	-0.235902	9097	0.0746586	FDR 5%	NAM_JL_4	δT, δT3, γT3, ΣT3, ΣTT3
αT		1_96053384	1	96053384	1.07e-05	0.0144575	0.0633609	0.258323	0.268299	0.00997537	-0.234876	9027	0.0740841	FDR 5%	NAM_JL_4	δT, δT3, γT3, ΣT3, ΣTT3
αT		1_96053503	1	96053503	1.07e-05	0.0144575	0.0633609	0.258323	0.268299	0.00997537	-0.234876	9028	0.0740923	FDR 5%	NAM_JL_4	δT, δT3, γT3, ΣT3, ΣTT3
αT		1_96053508	1	96053508	1.07e-05	0.0144575	0.0633609	0.258323	0.268299	0.00997537	-0.234876	9029	0.0741005	FDR 5%	NAM_JL_4	δT, δT3, γT3, ΣT3, ΣTT3
αT		1_96053518	1	96053518	1.07e-05	0.0144575	0.0633609	0.258323	0.268299	0.00997537	-0.234876	9030	0.0741087	FDR 5%	NAM_JL_4	δT, δT3, γT3, ΣT3, ΣTT3
αT		1_96053555	1	96053555	1.07e-05	0.0144575	0.0633609	0.258323	0.268299	0.00997537	-0.234876	9031	0.0741169	FDR 5%	NAM_JL_4	δT, δT3, γT3, ΣT3, ΣTT3
αT		1_96053589	1	96053589	1.07e-05	0.0144575	0.0633609	0.258323	0.268299	0.00997537	-0.234876	9032	0.0741251	FDR 5%	NAM_JL_4	δT, δT3, γT3, ΣT3, ΣTT3
αT		1_96081373	1	96081373	3.7e-06	0.00573756	0.0640496	0.258323	0.269353	0.0110301	-0.244444	7855	0.0644655	FDR 5%	NAM_JL_4	δT, δT3, γT3, ΣT3, ΣTT3
αT		1_96081451	1	96081451	3.7e-06	0.00573756	0.0640496	0.258323	0.269353	0.0110301	-0.244444	7856	0.0644737	FDR 5%	NAM_JL_4	δT, δT3, γT3, ΣT3, ΣTT3
αT		1_96081478	1	96081478	3.7e-06	0.00573756	0.0640496	0.258323	0.269353	0.0110301	-0.244444	7857	0.064482	FDR 5%	NAM_JL_4	δT, δT3, γT3, ΣT3, ΣTT3
αT		1_96081490	1	96081490	3.7e-06	0.00573756	0.0640496	0.258323	0.269353	0.0110301	-0.244444	7858	0.0644902	FDR 5%	NAM_JL_4	δT, δT3, γT3, ΣT3, ΣTT3
αT		1_96081521	1	96081521	3.7e-06	0.00573756	0.0640496	0.258323	0.269353	0.0110301	-0.244444	7859	0.0644984	FDR 5%	NAM_JL_4	δT, δT3, γT3, ΣT3, ΣTT3
αT		1_96082411	1	96082411	3.7e-06	0.00573756	0.0640496	0.258323	0.269353	0.0110301	-0.244444	7860	0.0645066	FDR 5%	NAM_JL_4	δT, δT3, γT3, ΣT3, ΣTT3
αT		1_96082476	1	96082476	6.48e-06	0.00928029	0.0647383	0.258323	0.268798	0.0104746	-0.235683	8503	0.0697836	FDR 5%	NAM_JL_4	δT, δT3, γT3, ΣT3, ΣTT3
αT		1_96082633	1	96082633	6.48e-06	0.00928029	0.0647383	0.258323	0.268798	0.0104746	-0.235683	8504	0.0697918	FDR 5%	NAM_JL_4	δT, δT3, γT3, ΣT3, ΣTT3
αT		1_229810153	1	229810153	3.84e-05	0.0433684	0.464876	0.258323	0.26704	0.00871728	0.100079	10788	0.0885365	FDR 5%	NAM_JL_5	αT, δT, γT, ΣT, δT3, γT3, ΣTT3
αT		1_272777936	1	272777936	1.25e-05	0.0166028	0.233471	0.258323	0.268144	0.00982095	-0.120819	9196	0.075471	FDR 5%
αT		1_272785942	1	272785942	1.29e-05	0.0170272	0.230716	0.258323	0.268116	0.00979245	-0.121228	9229	0.0757419	FDR 5%
αT		1_272785950	1	272785950	4.27e-06	0.00649042	0.22314	0.258323	0.269211	0.0108879	-0.127452	8021	0.0658279	FDR 5%
αT		1_272786143	1	272786143	2.84e-05	0.0334781	0.239669	0.258323	0.267337	0.00901368	-0.115219	10338	0.0848434	FDR 5%
αT		1_281230086	1	281230086	1.62e-05	0.0206681	0.0688705	0.258323	0.267891	0.00956795	0.205176	9543	0.0783189	FDR 5%
αT		1_281230092	1	281230092	1.33e-05	0.017535	0.0695592	0.258323	0.268082	0.00975913	0.205279	9269	0.0760702	FDR 5%
αT		1_281230095	1	281230095	2.71e-05	0.032125	0.0695592	0.258323	0.267385	0.00906154	0.198635	10262	0.0842196	FDR 5%
αT		1_306417404	1	306417404	7.89e-06	0.0110239	0.12259	0.258323	0.268602	0.0102789	0.159809	8721	0.0715727	FDR 5%
αT		2_24241988	2	24241988	2.82e-05	0.0332901	0.219697	0.258323	0.267344	0.00902055	-0.116106	10324	0.0847285	FDR 5%	NAM_JL_9	ΣT
αT		2_40891763	2	40891763	3.24e-05	0.0375402	0.379477	0.258323	0.267207	0.00888368	-0.101899	10522	0.0863535	FDR 5%	NAM_JL_10	δT, γT, αT3, γT3, ΣT3
αT		2_40891873	2	40891873	1.93e-05	0.0240835	0.437328	0.258323	0.267717	0.00939343	-0.103498	9774	0.0802147	FDR 5%	NAM_JL_10	δT, γT, αT3, γT3, ΣT3
αT		2_40907216	2	40907216	3.71e-05	0.0420516	0.334022	0.258323	0.267075	0.008752	-0.110584	10737	0.0881179	FDR 5%	NAM_JL_10	δT, γT, αT3, γT3, ΣT3
αT		2_40910889	2	40910889	3.64e-05	0.0414292	0.325758	0.258323	0.267093	0.00876939	-0.112488	10710	0.0878964	FDR 5%	NAM_JL_10	δT, γT, αT3, γT3, ΣT3
αT		2_40911305	2	40911305	1.62e-05	0.0206503	0.396006	0.258323	0.267892	0.00956911	-0.110816	9540	0.0782942	FDR 5%	NAM_JL_10	δT, γT, αT3, γT3, ΣT3
αT		2_45941430	2	45941430	4.66e-06	0.00700052	0.245179	0.258323	0.269124	0.0108013	-0.134427	8113	0.0665829	FDR 5%	NAM_JL_10	δT, γT, αT3, γT3, ΣT3
αT		2_62256935	2	62256935	3.2e-05	0.0370796	0.298209	0.258323	0.267221	0.00889769	-0.114657	10502	0.0861893	FDR 5%	NAM_JL_10	δT, γT, αT3, γT3, ΣT3
αT		2_62257243	2	62257243	3.66e-05	0.0415522	0.292011	0.258323	0.267089	0.00876575	-0.114241	10718	0.087962	FDR 5%	NAM_JL_10	δT, γT, αT3, γT3, ΣT3
αT		2_62259417	2	62259417	1.17e-05	0.0155461	0.0406336	0.258323	0.268215	0.00989149	0.252144	9145	0.0750525	FDR 5%	NAM_JL_10	δT, γT, αT3, γT3, ΣT3
αT		2_135549090	2	135549090	4.48e-05	0.0493088	0.023416	0.258323	0.266889	0.00856581	0.291455	11072	0.0908673	FDR 5%	NAM_JL_10	δT, γT, αT3, γT3, ΣT3
αT		2_190823590	2	190823590	1.34e-05	0.0175508	0.0495868	0.258323	0.268081	0.00975814	-0.206259	9270	0.0760784	FDR 5%	NAM_JL_11	γT, ΣT, ΣTT3
αT		2_219197129	2	219197129	3.71e-05	0.0420769	0.0778237	0.258323	0.267074	0.00875122	-0.17333	10742	0.088159	FDR 5%	NAM_JL_12	αT, δT, γT, ΣT, ΣTT3
αT		2_219197158	2	219197158	3.19e-05	0.0370026	0.0730028	0.258323	0.267224	0.00890048	-0.182144	10494	0.0861237	FDR 5%	NAM_JL_12	αT, δT, γT, ΣT, ΣTT3
αT		3_4748643	3	4748643	3.1e-05	0.0361023	0.109504	0.258323	0.267251	0.00892743	0.148046	10464	0.0858775	FDR 5%
αT		3_128077177	3	128077177	2.76e-05	0.0326397	0.139118	0.258323	0.267366	0.00904264	-0.15905	10296	0.0844987	FDR 5%	NAM_JL_14	αT3, δT3, γT3, ΣT3
αT		3_128270453	3	128270453	4.32e-05	0.0478459	0.0874656	0.258323	0.266924	0.00860051	-0.199494	11014	0.0903913	FDR 5%	NAM_JL_14	αT3, δT3, γT3, ΣT3
αT		3_128288318	3	128288318	1.41e-05	0.0184267	0.0915978	0.258323	0.268028	0.00970522	-0.205771	9315	0.0764477	FDR 5%	NAM_JL_14	αT3, δT3, γT3, ΣT3
αT		3_128317105	3	128317105	2.11e-05	0.0259995	0.0902204	0.258323	0.267629	0.00930541	-0.202574	9899	0.0812405	FDR 5%	NAM_JL_14	αT3, δT3, γT3, ΣT3
αT		3_128335553	3	128335553	2.32e-05	0.0280993	0.0909091	0.258323	0.267538	0.00921503	-0.200456	10039	0.0823895	FDR 5%	NAM_JL_14	αT3, δT3, γT3, ΣT3
αT		3_171347103	3	171347103	4.26e-05	0.047335	0.26584	0.258323	0.266938	0.0086148	-0.10812	10971	0.0900384	FDR 5%	NAM_JL_15	αT
αT		3_181965201	3	181965201	2.45e-05	0.0294793	0.0213499	0.258323	0.267482	0.00915911	-0.352472	10128	0.0831199	FDR 5%	NAM_JL_17	ΣTT3
αT		3_184785497	3	184785497	2.35e-05	0.0284999	0.278926	0.258323	0.267522	0.00919854	0.122821	10065	0.0826029	FDR 5%	NAM_JL_17	ΣTT3
αT		3_184811347	3	184811347	5.82e-06	0.00843405	0.393251	0.258323	0.268904	0.0105807	0.108167	8408	0.069004	FDR 5%	NAM_JL_17	ΣTT3
αT		3_184812298	3	184812298	3.87e-05	0.0435939	0.294077	0.258323	0.267033	0.00871024	0.116711	10810	0.0887171	FDR 5%	NAM_JL_17	ΣTT3
αT		3_189698948	3	189698948	2.81e-05	0.0331843	0.123278	0.258323	0.267347	0.00902397	0.148216	10318	0.0846792	FDR 5%	NAM_JL_18	αT, γT, ΣT, δT3
αT		3_231352240	3	231352240	1.82e-05	0.0228957	0.496556	0.258323	0.267773	0.0094498	-0.100192	9710	0.0796894	FDR 5%
αT		3_231396637	3	231396637	2.31e-05	0.0280688	0.0571625	0.258323	0.26754	0.00921639	0.200885	10036	0.0823649	FDR 5%
αT		3_232290778	3	232290778	2.1e-05	0.0259035	0.0144628	0.258323	0.267633	0.00930936	-0.342854	9893	0.0811913	FDR 5%
αT		3_232290847	3	232290847	2.1e-05	0.0259035	0.0144628	0.258323	0.267633	0.00930936	-0.342854	9894	0.0811995	FDR 5%
αT		3_232290964	3	232290964	2.1e-05	0.0259035	0.0144628	0.258323	0.267633	0.00930936	-0.342854	9895	0.0812077	FDR 5%
αT		3_232291001	3	232291001	2.1e-05	0.0259035	0.0144628	0.258323	0.267633	0.00930936	-0.342854	9896	0.0812159	FDR 5%
αT		3_232291265	3	232291265	3.21e-06	0.0050583	0.0123967	0.258323	0.269495	0.0111717	-0.404972	7736	0.0634889	FDR 5%
αT		3_232298291	3	232298291	2.39e-05	0.02884	0.252755	0.258323	0.267509	0.00918538	-0.122736	10080	0.082726	FDR 5%
αT		3_232298769	3	232298769	1.06e-05	0.0143773	0.25	0.258323	0.268305	0.00998211	-0.129944	9021	0.0740348	FDR 5%
αT		3_232298778	3	232298778	1.06e-05	0.0143773	0.25	0.258323	0.268305	0.00998211	-0.129944	9022	0.074043	FDR 5%
αT		3_232298787	3	232298787	1.06e-05	0.0143773	0.25	0.258323	0.268305	0.00998211	-0.129944	9023	0.0740512	FDR 5%
αT		3_232298826	3	232298826	1.11e-05	0.0148936	0.250689	0.258323	0.268265	0.00994215	-0.129563	9069	0.0744288	FDR 5%
αT		3_232476883	3	232476883	9.09e-06	0.0124856	0.183884	0.258323	0.268462	0.0101385	-0.137316	8871	0.0728038	FDR 5%
αT		3_232486243	3	232486243	3.07e-05	0.0357574	0.21832	0.258323	0.267261	0.00893787	-0.117857	10453	0.0857872	FDR 5%
αT		3_232486427	3	232486427	2.36e-05	0.0285659	0.216253	0.258323	0.267519	0.00919567	-0.119643	10071	0.0826521	FDR 5%
αT		3_232487606	3	232487606	2.17e-05	0.0266465	0.214876	0.258323	0.2676	0.00927672	-0.120298	9944	0.0816098	FDR 5%
αT		3_232488148	3	232488148	3.67e-05	0.0416618	0.214876	0.258323	0.267086	0.0087627	-0.11757	10722	0.0879948	FDR 5%
αT		3_232488209	3	232488209	3.67e-05	0.0416618	0.214876	0.258323	0.267086	0.0087627	-0.11757	10723	0.088003	FDR 5%
αT		3_232489650	3	232489650	9.33e-06	0.0127881	0.168044	0.258323	0.268436	0.0101127	-0.144215	8891	0.0729679	FDR 5%
αT		3_232491748	3	232491748	2.72e-05	0.0322573	0.216253	0.258323	0.26738	0.00905692	-0.118799	10268	0.0842689	FDR 5%
αT		3_232491878	3	232491878	2.1e-05	0.0258383	0.214876	0.258323	0.267636	0.00931254	-0.120558	9889	0.0811585	FDR 5%
αT		3_232494047	3	232494047	3.77e-05	0.0427045	0.216942	0.258323	0.267058	0.00873467	-0.116448	10762	0.0883231	FDR 5%
αT		3_232496554	3	232496554	3.77e-05	0.0427045	0.216942	0.258323	0.267058	0.00873467	-0.116448	10763	0.0883313	FDR 5%
αT		3_232496925	3	232496925	3.77e-05	0.0427045	0.216942	0.258323	0.267058	0.00873467	-0.116448	10764	0.0883395	FDR 5%
αT		3_232499511	3	232499511	2.95e-05	0.0345761	0.217631	0.258323	0.2673	0.00897642	-0.118139	10395	0.0853112	FDR 5%
αT		3_232499903	3	232499903	1.59e-05	0.0203611	0.168044	0.258323	0.267911	0.00958829	-0.140349	9491	0.0778921	FDR 5%
αT		3_232499997	3	232499997	2.16e-05	0.0265043	0.216253	0.258323	0.267607	0.00928387	-0.120553	9923	0.0814375	FDR 5%
αT		3_232500066	3	232500066	2.16e-05	0.0265043	0.216253	0.258323	0.267607	0.00928387	-0.120553	9924	0.0814457	FDR 5%
αT		3_232500072	3	232500072	2.16e-05	0.0265043	0.216253	0.258323	0.267607	0.00928387	-0.120553	9925	0.0814539	FDR 5%
αT		3_232500307	3	232500307	2.95e-05	0.0345761	0.217631	0.258323	0.2673	0.00897642	-0.118139	10396	0.0853194	FDR 5%
αT		3_232516831	3	232516831	2.43e-05	0.0292471	0.215565	0.258323	0.267491	0.00916797	-0.11954	10117	0.0830296	FDR 5%
αT		3_232637697	3	232637697	1.3e-05	0.0171649	0.319559	0.258323	0.268106	0.00978289	0.11012	9244	0.075865	FDR 5%
αT		3_233005755	3	233005755	4.2e-05	0.0467121	0.299587	0.258323	0.266953	0.00863031	0.104111	10944	0.0898168	FDR 5%
αT		4_6609974	4	6609974	1.24e-05	0.0164682	0.346419	0.258323	0.268153	0.00983019	-0.10332	9185	0.0753808	FDR 5%
αT		4_14570471	4	14570471	3.59e-05	0.0408901	0.0199725	0.258323	0.267107	0.00878382	0.317671	10693	0.0877568	FDR 5%	NAM_JL_20	αT
αT		4_23954173	4	23954173	4.22e-05	0.0469392	0.0151515	0.258323	0.266948	0.00862474	-0.353274	10953	0.0898906	FDR 5%
αT		4_38403351	4	38403351	5.69e-06	0.00827083	0.0564738	0.258323	0.268926	0.0106025	0.23008	8385	0.0688152	FDR 5%	NAM_JL_21	δT, γT, ΣT, αT3, δT3, γT3, ΣT3, ΣTT3
αT		4_38403832	4	38403832	2.81e-06	0.00450595	0.0495868	0.258323	0.269628	0.0113045	0.252765	7602	0.0623892	FDR 5%	NAM_JL_21	δT, γT, ΣT, αT3, δT3, γT3, ΣT3, ΣTT3
αT		4_160478556	4	160478556	1.9e-05	0.0237005	0.035124	0.258323	0.267735	0.00941177	0.246405	9749	0.0800095	FDR 5%
αT		4_160479069	4	160479069	1.07e-05	0.0144581	0.0344353	0.258323	0.268298	0.00997493	0.253626	9037	0.0741661	FDR 5%
αT		4_160479087	4	160479087	2.07e-05	0.0255108	0.0330579	0.258323	0.267649	0.00932622	0.257912	9873	0.0810271	FDR 5%
αT		4_160479213	4	160479213	1.76e-05	0.0222078	0.0316804	0.258323	0.267808	0.00948439	0.265885	9666	0.0793283	FDR 5%
αT		4_234797396	4	234797396	3.12e-05	0.0363412	0.230716	0.258323	0.267243	0.00892017	-0.125648	10473	0.0859513	FDR 5%
αT		4_242400711	4	242400711	1.4e-05	0.0183282	0.243802	0.258323	0.268034	0.00971062	0.120096	9314	0.0764395	FDR 5%
αT		4_242525062	4	242525062	2.75e-05	0.0325363	0.289945	0.258323	0.267369	0.00904605	0.10386	10288	0.084433	FDR 5%
αT		4_242525105	4	242525105	2.75e-05	0.0325363	0.289945	0.258323	0.267369	0.00904605	0.10386	10289	0.0844412	FDR 5%
αT		4_242525121	4	242525121	3.85e-05	0.0434222	0.289256	0.258323	0.267038	0.00871457	0.102015	10797	0.0886104	FDR 5%
αT		4_242525142	4	242525142	3.85e-05	0.0434222	0.289256	0.258323	0.267038	0.00871457	0.102015	10798	0.0886186	FDR 5%
αT		4_242525246	4	242525246	3.85e-05	0.0434222	0.289256	0.258323	0.267038	0.00871457	0.102015	10799	0.0886268	FDR 5%
αT		4_242525305	4	242525305	2.75e-05	0.0325363	0.289945	0.258323	0.267369	0.00904605	0.10386	10290	0.0844494	FDR 5%
αT		4_242525369	4	242525369	3.78e-05	0.042824	0.287879	0.258323	0.267055	0.00873156	0.102303	10768	0.0883724	FDR 5%
αT		4_242527426	4	242527426	1.5e-05	0.0194556	0.216253	0.258323	0.267968	0.00964509	0.118937	9376	0.0769483	FDR 5%
αT		4_242528934	4	242528934	2.3e-05	0.0279385	0.245179	0.258323	0.267545	0.00922186	0.110472	10026	0.0822828	FDR 5%
αT		4_242528988	4	242528988	2.3e-05	0.0279385	0.245179	0.258323	0.267545	0.00922186	0.110472	10027	0.082291	FDR 5%
αT		4_242529189	4	242529189	3.31e-05	0.0382104	0.24449	0.258323	0.267187	0.00886386	0.108356	10546	0.0865504	FDR 5%
αT		4_242529191	4	242529191	3.31e-05	0.0382104	0.24449	0.258323	0.267187	0.00886386	0.108356	10547	0.0865586	FDR 5%
αT		4_242529305	4	242529305	3.31e-05	0.0382104	0.24449	0.258323	0.267187	0.00886386	0.108356	10548	0.0865668	FDR 5%
αT		4_242529881	4	242529881	2.17e-05	0.0266132	0.247245	0.258323	0.267601	0.00927824	0.110737	9932	0.0815114	FDR 5%
αT		4_242530081	4	242530081	2.17e-05	0.0266132	0.247245	0.258323	0.267601	0.00927824	0.110737	9933	0.0815196	FDR 5%
αT		4_242530083	4	242530083	2.17e-05	0.0266132	0.247245	0.258323	0.267601	0.00927824	0.110737	9934	0.0815278	FDR 5%
αT		4_242530188	4	242530188	2.65e-05	0.0315943	0.243802	0.258323	0.267404	0.00908111	0.109711	10229	0.0839488	FDR 5%
αT		4_242530277	4	242530277	2.69e-05	0.0319933	0.243802	0.258323	0.26739	0.00906635	0.109508	10253	0.0841458	FDR 5%
αT		4_242530309	4	242530309	2.69e-05	0.0319933	0.243802	0.258323	0.26739	0.00906635	0.109508	10254	0.084154	FDR 5%
αT		4_242530792	4	242530792	1.55e-05	0.0200399	0.241736	0.258323	0.267936	0.00961261	0.112894	9407	0.0772027	FDR 5%
αT		4_242531177	4	242531177	3.44e-05	0.0393794	0.243113	0.258323	0.267149	0.00882598	0.107932	10637	0.0872973	FDR 5%
αT		4_242531428	4	242531428	3.38e-05	0.0388992	0.245868	0.258323	0.267165	0.00884155	0.107985	10599	0.0869854	FDR 5%
αT		4_242531723	4	242531723	2.38e-05	0.0287728	0.242424	0.258323	0.267511	0.00918817	0.110393	10075	0.082685	FDR 5%
αT		4_242532492	4	242532492	1.05e-05	0.0142154	0.243113	0.258323	0.268318	0.00999496	0.115312	9005	0.0739035	FDR 5%
αT		4_242532710	4	242532710	4.03e-05	0.0451632	0.248623	0.258323	0.266994	0.00867055	0.106703	10864	0.0891602	FDR 5%
αT		4_242533950	4	242533950	1.23e-05	0.0163833	0.238292	0.258323	0.268159	0.00983584	0.114079	9180	0.0753397	FDR 5%
αT		4_242533994	4	242533994	2.22e-05	0.0271017	0.239669	0.258323	0.26758	0.00925679	0.111277	9974	0.081856	FDR 5%
αT		4_242548279	4	242548279	3.48e-05	0.0397916	0.13292	0.258323	0.267138	0.00881472	0.138779	10648	0.0873875	FDR 5%
αT		5_8170709	5	8170709	5.16e-06	0.00757867	0.129477	0.258323	0.269023	0.0107001	-0.161141	8290	0.0680356	FDR 5%
αT		5_8170940	5	8170940	1.06e-05	0.0143116	0.197658	0.258323	0.268311	0.00998741	-0.125789	9016	0.0739938	FDR 5%
αT		5_8180315	5	8180315	1.97e-05	0.024505	0.150138	0.258323	0.267697	0.0093738	0.135781	9798	0.0804116	FDR 5%
αT		5_8180324	5	8180324	1.97e-05	0.024505	0.150138	0.258323	0.267697	0.0093738	0.135781	9799	0.0804198	FDR 5%
αT		5_8701399	5	8701399	3e-06	0.0047698	0.371212	0.258323	0.269563	0.0112402	0.110011	7660	0.0628652	FDR 5%
αT		5_25113858	5	25113858	2.98e-05	0.0348903	0.40427	0.258323	0.267289	0.00896582	0.10116	10414	0.0854671	FDR 5%	NAM_JL_24	αT, δT, γT, ΣT, δT3, γT3, ΣTT3
αT		5_25434949	5	25434949	1.69e-05	0.0214307	0.462121	0.258323	0.267849	0.00952558	0.107632	9607	0.0788441	FDR 5%	NAM_JL_24	αT, δT, γT, ΣT, δT3, γT3, ΣTT3
αT		5_25435706	5	25435706	6.2e-06	0.00892547	0.475207	0.258323	0.268841	0.010518	0.113818	8463	0.0694554	FDR 5%	NAM_JL_24	αT, δT, γT, ΣT, δT3, γT3, ΣTT3
αT		5_25435977	5	25435977	6.2e-06	0.00892547	0.475207	0.258323	0.268841	0.010518	0.113818	8464	0.0694636	FDR 5%	NAM_JL_24	αT, δT, γT, ΣT, δT3, γT3, ΣTT3
αT		5_25436360	5	25436360	4.41e-06	0.00666851	0.469697	0.258323	0.26918	0.0108567	0.115587	8053	0.0660905	FDR 5%	NAM_JL_24	αT, δT, γT, ΣT, δT3, γT3, ΣTT3
αT		5_25436629	5	25436629	3.9e-06	0.00600291	0.469008	0.258323	0.269302	0.010979	0.116439	7913	0.0649415	FDR 5%	NAM_JL_24	αT, δT, γT, ΣT, δT3, γT3, ΣTT3
αT		5_25437139	5	25437139	4.04e-06	0.00618898	0.496556	0.258323	0.269266	0.0109426	0.117044	7961	0.0653355	FDR 5%	NAM_JL_24	αT, δT, γT, ΣT, δT3, γT3, ΣTT3
αT		5_25437340	5	25437340	1.26e-06	0.00216124	0.466942	0.258323	0.270426	0.0121027	0.122207	7123	0.0584581	FDR 5%	NAM_JL_24	αT, δT, γT, ΣT, δT3, γT3, ΣTT3
αT		5_25437397	5	25437397	6.42e-07	0.00114916	0.466942	0.258323	0.271103	0.0127798	0.125714	6812	0.0559057	FDR 5%	NAM_JL_24	αT, δT, γT, ΣT, δT3, γT3, ΣTT3
αT		5_25438621	5	25438621	1.15e-05	0.0153496	0.458678	0.258323	0.26823	0.0099071	0.109178	9117	0.0748227	FDR 5%	NAM_JL_24	αT, δT, γT, ΣT, δT3, γT3, ΣTT3
αT		5_25438693	5	25438693	2.08e-06	0.00342696	0.438017	0.258323	0.26993	0.0116063	0.117858	7384	0.0606001	FDR 5%	NAM_JL_24	αT, δT, γT, ΣT, δT3, γT3, ΣTT3
αT		5_25438718	5	25438718	1.06e-06	0.00183013	0.444215	0.258323	0.270604	0.0122805	0.120851	7042	0.0577933	FDR 5%	NAM_JL_24	αT, δT, γT, ΣT, δT3, γT3, ΣTT3
αT		5_25438754	5	25438754	6.56e-06	0.00938736	0.449036	0.258323	0.268785	0.0104616	0.110597	8518	0.0699067	FDR 5%	NAM_JL_24	αT, δT, γT, ΣT, δT3, γT3, ΣTT3
αT		5_25518275	5	25518275	2.14e-05	0.0263258	0.465565	0.258323	0.267615	0.00929143	0.106729	9916	0.08138	FDR 5%	NAM_JL_24	αT, δT, γT, ΣT, δT3, γT3, ΣTT3
αT		5_26064690	5	26064690	3.19e-05	0.0370178	0.472452	0.258323	0.267223	0.0088997	0.10362	10498	0.0861565	FDR 5%	NAM_JL_24	αT, δT, γT, ΣT, δT3, γT3, ΣTT3
αT		5_26785950	5	26785950	4.56e-06	0.00686502	0.0213499	0.258323	0.269147	0.0108234	0.401864	8091	0.0664024	FDR 5%	NAM_JL_24	αT, δT, γT, ΣT, δT3, γT3, ΣTT3
αT		5_26906341	5	26906341	2.7e-05	0.0320233	0.0358127	0.258323	0.267389	0.00906533	0.268042	10255	0.0841622	FDR 5%	NAM_JL_24	αT, δT, γT, ΣT, δT3, γT3, ΣTT3
αT		5_31498299	5	31498299	2.71e-06	0.00436446	0.0550964	0.258323	0.269664	0.0113408	0.226703	7567	0.0621019	FDR 5%
αT		5_40858296	5	40858296	4.28e-05	0.0475496	0.430441	0.258323	0.266933	0.00860964	-0.113371	10980	0.0901122	FDR 5%
αT		5_40859826	5	40859826	2.81e-05	0.033172	0.429752	0.258323	0.267348	0.00902502	-0.115938	10313	0.0846382	FDR 5%
αT		5_40860530	5	40860530	2.32e-05	0.0281797	0.432507	0.258323	0.267535	0.00921202	-0.116344	10041	0.0824059	FDR 5%
αT		5_40861051	5	40861051	2.5e-05	0.030044	0.430441	0.258323	0.267462	0.00913896	-0.116529	10143	0.083243	FDR 5%
αT		5_40861162	5	40861162	2.24e-05	0.0273801	0.431129	0.258323	0.267569	0.00924629	-0.117152	9981	0.0819135	FDR 5%
αT		5_40861727	5	40861727	2.52e-05	0.0302114	0.430441	0.258323	0.267456	0.00913242	-0.11657	10154	0.0833333	FDR 5%
αT		5_40863793	5	40863793	1.71e-05	0.0217027	0.431129	0.258323	0.267835	0.00951163	-0.118304	9621	0.078959	FDR 5%
αT		5_40878197	5	40878197	4.04e-05	0.045226	0.429063	0.258323	0.266991	0.00866826	-0.114181	10871	0.0892177	FDR 5%
αT		5_40878289	5	40878289	4.48e-05	0.0492844	0.429752	0.258323	0.26689	0.00856638	-0.11319	11069	0.0908427	FDR 5%
αT		5_40878350	5	40878350	4.48e-05	0.0492844	0.429752	0.258323	0.26689	0.00856638	-0.11319	11070	0.0908509	FDR 5%
αT		5_40878692	5	40878692	4.48e-05	0.0492844	0.429752	0.258323	0.26689	0.00856638	-0.11319	11071	0.0908591	FDR 5%
αT		5_40878858	5	40878858	2.35e-05	0.0284397	0.433196	0.258323	0.267524	0.00920101	-0.116458	10061	0.0825701	FDR 5%
αT		5_40879324	5	40879324	4.04e-05	0.045226	0.429063	0.258323	0.266991	0.00866826	-0.114181	10872	0.0892259	FDR 5%
αT		5_40879440	5	40879440	4.04e-05	0.045226	0.429063	0.258323	0.266991	0.00866826	-0.114181	10873	0.0892341	FDR 5%
αT		5_40879472	5	40879472	4.04e-05	0.045226	0.429063	0.258323	0.266991	0.00866826	-0.114181	10874	0.0892423	FDR 5%
αT		5_40879478	5	40879478	4.04e-05	0.045226	0.429063	0.258323	0.266991	0.00866826	-0.114181	10875	0.0892505	FDR 5%
αT		5_40891825	5	40891825	1.78e-05	0.0223623	0.426309	0.258323	0.2678	0.00947663	-0.119469	9675	0.0794022	FDR 5%
αT		5_40892242	5	40892242	3.4e-05	0.0390395	0.428375	0.258323	0.26716	0.00883662	-0.115439	10611	0.0870839	FDR 5%
αT		5_40892307	5	40892307	3.4e-05	0.0390395	0.428375	0.258323	0.26716	0.00883662	-0.115439	10612	0.0870921	FDR 5%
αT		5_40892308	5	40892308	3.4e-05	0.0390395	0.428375	0.258323	0.26716	0.00883662	-0.115439	10613	0.0871003	FDR 5%
αT		5_40893436	5	40893436	3.04e-05	0.0354436	0.428375	0.258323	0.267271	0.00894817	-0.116364	10437	0.0856559	FDR 5%
αT		5_40893784	5	40893784	2.26e-05	0.0275477	0.429752	0.258323	0.267562	0.0092385	-0.117837	9999	0.0820612	FDR 5%
αT		5_40893838	5	40893838	4.12e-05	0.045961	0.427686	0.258323	0.266971	0.00864829	-0.114489	10919	0.0896116	FDR 5%
αT		5_40893839	5	40893839	4.12e-05	0.045961	0.427686	0.258323	0.266971	0.00864829	-0.114489	10920	0.0896198	FDR 5%
αT		5_40893843	5	40893843	4.12e-05	0.045961	0.427686	0.258323	0.266971	0.00864829	-0.114489	10921	0.089628	FDR 5%
αT		5_40894776	5	40894776	4.29e-05	0.0475722	0.429752	0.258323	0.266932	0.00860851	-0.113272	10981	0.0901204	FDR 5%
αT		5_40896124	5	40896124	2.95e-05	0.0345995	0.442837	0.258323	0.267299	0.00897566	-0.114904	10397	0.0853276	FDR 5%
αT		5_40897196	5	40897196	3.25e-05	0.037586	0.426997	0.258323	0.267205	0.00888192	-0.115689	10526	0.0863863	FDR 5%
αT		5_40897356	5	40897356	3.25e-05	0.037586	0.426997	0.258323	0.267205	0.00888192	-0.115689	10527	0.0863945	FDR 5%
αT		5_40898530	5	40898530	3.25e-05	0.037586	0.426997	0.258323	0.267205	0.00888192	-0.115689	10528	0.0864027	FDR 5%
αT		5_40899797	5	40899797	2.14e-05	0.0262659	0.431129	0.258323	0.267617	0.00929397	-0.116479	9913	0.0813554	FDR 5%
αT		5_40899890	5	40899890	2.92e-05	0.0342701	0.427686	0.258323	0.267311	0.00898797	-0.116314	10364	0.0850568	FDR 5%
αT		5_40899984	5	40899984	2.92e-05	0.0342701	0.427686	0.258323	0.267311	0.00898797	-0.116314	10365	0.085065	FDR 5%
αT		5_40900513	5	40900513	2.62e-05	0.0313122	0.426997	0.258323	0.267415	0.00909216	-0.117304	10204	0.0837436	FDR 5%
αT		5_40901545	5	40901545	2.62e-05	0.0313122	0.426997	0.258323	0.267415	0.00909216	-0.117304	10205	0.0837519	FDR 5%
αT		5_40902076	5	40902076	6.5e-06	0.00931342	0.429063	0.258323	0.268794	0.0104705	-0.124681	8509	0.0698329	FDR 5%
αT		5_40902908	5	40902908	1.7e-05	0.0215271	0.424931	0.258323	0.267844	0.00952054	-0.120602	9613	0.0788933	FDR 5%
αT		5_40903282	5	40903282	1.38e-05	0.0181413	0.42562	0.258323	0.268045	0.00972203	-0.121471	9302	0.076341	FDR 5%
αT		5_40903726	5	40903726	1.63e-05	0.0207765	0.426997	0.258323	0.267885	0.00956217	-0.119712	9548	0.0783599	FDR 5%
αT		5_40903755	5	40903755	1.63e-05	0.0207765	0.426997	0.258323	0.267885	0.00956217	-0.119712	9549	0.0783681	FDR 5%
αT		5_40903834	5	40903834	3.04e-05	0.0354709	0.426997	0.258323	0.26727	0.00894704	-0.115938	10439	0.0856723	FDR 5%
αT		5_40903884	5	40903884	3.68e-05	0.0418492	0.426309	0.258323	0.267081	0.00875783	-0.114992	10728	0.0880441	FDR 5%
αT		5_40903982	5	40903982	3.04e-05	0.0354709	0.426997	0.258323	0.26727	0.00894704	-0.115938	10440	0.0856805	FDR 5%
αT		5_40904029	5	40904029	2.73e-05	0.0323781	0.427686	0.258323	0.267375	0.00905219	-0.116547	10279	0.0843592	FDR 5%
αT		5_40904115	5	40904115	3.04e-05	0.0354709	0.426997	0.258323	0.26727	0.00894704	-0.115938	10441	0.0856887	FDR 5%
αT		5_40904159	5	40904159	4.05e-05	0.0453733	0.433196	0.258323	0.266987	0.00866398	-0.113402	10887	0.089349	FDR 5%
αT		5_40904319	5	40904319	2.18e-05	0.0266745	0.428375	0.258323	0.267599	0.00927539	-0.117991	9946	0.0816263	FDR 5%
αT		5_40904502	5	40904502	2.62e-05	0.0313122	0.426997	0.258323	0.267415	0.00909216	-0.117304	10206	0.0837601	FDR 5%
αT		5_40904773	5	40904773	3.78e-05	0.0427508	0.439394	0.258323	0.267057	0.00873333	-0.113278	10766	0.0883559	FDR 5%
αT		5_40904780	5	40904780	3.78e-05	0.0427508	0.439394	0.258323	0.267057	0.00873333	-0.113278	10767	0.0883642	FDR 5%
αT		5_40906245	5	40906245	3.65e-05	0.0414714	0.426309	0.258323	0.267091	0.00876802	-0.11508	10713	0.087921	FDR 5%
αT		5_40906289	5	40906289	3.26e-05	0.0377521	0.427686	0.258323	0.267201	0.0088774	-0.115697	10530	0.0864191	FDR 5%
αT		5_40906701	5	40906701	3.57e-05	0.040768	0.427686	0.258323	0.267111	0.00878768	-0.11497	10683	0.0876748	FDR 5%
αT		5_40906712	5	40906712	2.69e-05	0.0319412	0.426997	0.258323	0.267391	0.00906825	-0.116933	10249	0.084113	FDR 5%
αT		5_40917229	5	40917229	2.05e-05	0.0252985	0.368457	0.258323	0.26766	0.00933706	-0.125295	9852	0.0808548	FDR 5%
αT		5_40973478	5	40973478	3.21e-05	0.0372268	0.429752	0.258323	0.267216	0.00889314	-0.115768	10506	0.0862221	FDR 5%
αT		5_40973489	5	40973489	3.21e-05	0.0372268	0.429752	0.258323	0.267216	0.00889314	-0.115768	10507	0.0862304	FDR 5%
αT		5_40973496	5	40973496	3.21e-05	0.0372268	0.429752	0.258323	0.267216	0.00889314	-0.115768	10508	0.0862386	FDR 5%
αT		5_40973502	5	40973502	3.21e-05	0.0372268	0.429752	0.258323	0.267216	0.00889314	-0.115768	10509	0.0862468	FDR 5%
αT		5_40973539	5	40973539	3.28e-05	0.0379524	0.42562	0.258323	0.267195	0.00887145	-0.116078	10537	0.0864766	FDR 5%
αT		5_40973627	5	40973627	3.28e-05	0.0379524	0.42562	0.258323	0.267195	0.00887145	-0.116078	10538	0.0864848	FDR 5%
αT		5_40973640	5	40973640	4.11e-05	0.0458519	0.429063	0.258323	0.266975	0.00865134	-0.114669	10913	0.0895624	FDR 5%
αT		5_40973726	5	40973726	3.31e-05	0.0382334	0.427686	0.258323	0.267186	0.00886286	-0.116086	10551	0.0865915	FDR 5%
αT		5_40973738	5	40973738	3.31e-05	0.0382334	0.427686	0.258323	0.267186	0.00886286	-0.116086	10552	0.0865997	FDR 5%
αT		5_40973748	5	40973748	2.91e-05	0.0342036	0.429063	0.258323	0.267314	0.00899049	-0.116574	10360	0.0850239	FDR 5%
αT		5_40974138	5	40974138	2.92e-05	0.0342701	0.427686	0.258323	0.267311	0.00898797	-0.116314	10366	0.0850732	FDR 5%
αT		5_40974145	5	40974145	3.27e-05	0.0378561	0.426997	0.258323	0.267197	0.00887413	-0.115714	10535	0.0864601	FDR 5%
αT		5_40974254	5	40974254	2.85e-05	0.0336165	0.431818	0.258323	0.267332	0.00900914	-0.116	10343	0.0848844	FDR 5%
αT		5_40974343	5	40974343	2.92e-05	0.0343501	0.426309	0.258323	0.267309	0.00898553	-0.11668	10368	0.0850896	FDR 5%
αT		5_40974450	5	40974450	2.1e-05	0.025891	0.463499	0.258323	0.267633	0.00931024	-0.115918	9892	0.0811831	FDR 5%
αT		5_40974470	5	40974470	2.94e-05	0.0345316	0.426309	0.258323	0.267301	0.00897816	-0.116712	10387	0.0852455	FDR 5%
αT		5_40974490	5	40974490	2.94e-05	0.0345316	0.426309	0.258323	0.267301	0.00897816	-0.116712	10388	0.0852537	FDR 5%
αT		5_40974514	5	40974514	2.94e-05	0.0345316	0.426309	0.258323	0.267301	0.00897816	-0.116712	10389	0.0852619	FDR 5%
αT		5_40974526	5	40974526	2.94e-05	0.0345316	0.426309	0.258323	0.267301	0.00897816	-0.116712	10390	0.0852701	FDR 5%
αT		5_40974559	5	40974559	2.94e-05	0.0345316	0.426309	0.258323	0.267301	0.00897816	-0.116712	10391	0.0852783	FDR 5%
αT		5_40974957	5	40974957	3.27e-05	0.0378561	0.426997	0.258323	0.267197	0.00887413	-0.115714	10536	0.0864684	FDR 5%
αT		5_40975281	5	40975281	2.25e-05	0.0274449	0.426309	0.258323	0.267567	0.00924376	-0.118381	9982	0.0819217	FDR 5%
αT		5_40975291	5	40975291	2.25e-05	0.0274449	0.426309	0.258323	0.267567	0.00924376	-0.118381	9983	0.0819299	FDR 5%
αT		5_40975351	5	40975351	1.67e-05	0.0212557	0.426997	0.258323	0.267858	0.00953481	-0.120051	9596	0.0787538	FDR 5%
αT		5_40975397	5	40975397	1.5e-05	0.0194454	0.427686	0.258323	0.267969	0.00964572	-0.120689	9374	0.0769319	FDR 5%
αT		5_40975401	5	40975401	1.5e-05	0.0194454	0.427686	0.258323	0.267969	0.00964572	-0.120689	9375	0.0769401	FDR 5%
αT		5_40975440	5	40975440	2.2e-05	0.0268945	0.426997	0.258323	0.26759	0.00926639	-0.1184	9955	0.0817001	FDR 5%
αT		5_40975448	5	40975448	2.2e-05	0.0268945	0.426997	0.258323	0.26759	0.00926639	-0.1184	9956	0.0817083	FDR 5%
αT		5_40975587	5	40975587	2.93e-05	0.034412	0.427686	0.258323	0.267307	0.00898338	-0.116444	10372	0.0851224	FDR 5%
αT		5_40976172	5	40976172	2.07e-05	0.0255377	0.417355	0.258323	0.267648	0.00932508	-0.116237	9879	0.0810764	FDR 5%
αT		5_40980145	5	40980145	2.98e-05	0.0348903	0.495179	0.258323	0.267289	0.00896587	-0.111836	10413	0.0854589	FDR 5%
αT		5_40981496	5	40981496	1.95e-05	0.0242807	0.48416	0.258323	0.267707	0.00938418	-0.114952	9786	0.0803131	FDR 5%
αT		5_41037103	5	41037103	2.17e-05	0.0265765	0.485537	0.258323	0.267604	0.009281	-0.112661	9926	0.0814621	FDR 5%
αT		5_44392812	5	44392812	2.31e-06	0.00377975	0.0275482	0.258323	0.269823	0.0115	0.322006	7447	0.0611171	FDR 5%	NAM_JL_25	αT3, ΣT3
αT		5_44392834	5	44392834	2.31e-06	0.00377975	0.0275482	0.258323	0.269823	0.0115	0.322006	7448	0.0611253	FDR 5%	NAM_JL_25	αT3, ΣT3
αT		5_57109153	5	57109153	3.38e-05	0.0388445	0.215565	0.258323	0.267166	0.00884303	0.119227	10598	0.0869772	FDR 5%	NAM_JL_25	αT3, ΣT3
αT		5_57109217	5	57109217	2.59e-05	0.0309747	0.220386	0.258323	0.267427	0.0091043	0.121145	10189	0.0836205	FDR 5%	NAM_JL_25	αT3, ΣT3
αT		5_60958416	5	60958416	4.32e-05	0.0478202	0.258264	0.258323	0.266924	0.00860113	0.110246	11013	0.0903831	FDR 5%	NAM_JL_25	αT3, ΣT3
αT		5_61066967	5	61066967	3e-05	0.0350396	0.245179	0.258323	0.267284	0.00896068	0.119247	10424	0.0855492	FDR 5%	NAM_JL_25	αT3, ΣT3
αT		5_61067289	5	61067289	3.38e-05	0.0388389	0.208678	0.258323	0.267167	0.00884335	0.118303	10596	0.0869608	FDR 5%	NAM_JL_25	αT3, ΣT3
αT		5_61074652	5	61074652	2.02e-05	0.0250634	0.241047	0.258323	0.26767	0.00934716	0.117995	9843	0.0807809	FDR 5%	NAM_JL_25	αT3, ΣT3
αT		5_61074671	5	61074671	2.57e-05	0.0307556	0.25551	0.258323	0.267436	0.00911281	0.113913	10175	0.0835056	FDR 5%	NAM_JL_25	αT3, ΣT3
αT		5_68563192	5	68563192	3.1e-05	0.0361113	0.0606061	0.258323	0.26725	0.00892697	0.202495	10467	0.0859021	FDR 5%	NAM_JL_25	αT3, ΣT3
αT		5_68659494	5	68659494	4.39e-06	0.00665924	0.0323691	0.258323	0.269184	0.0108603	0.282875	8037	0.0659592	FDR 5%	NAM_JL_25	αT3, ΣT3
αT		5_68668951	5	68668951	3.97e-05	0.0445546	0.0282369	0.258323	0.267008	0.00868475	0.261777	10855	0.0890864	FDR 5%	NAM_JL_25	αT3, ΣT3
αT		5_154453395	5	154453395	2.83e-05	0.0333657	0.475895	0.258323	0.267341	0.00901784	-0.107045	10329	0.0847695	FDR 5%	NAM_JL_26	δT, γT, ΣT, δT3, γT3, ΣT3, ΣTT3
αT		5_162585726	5	162585726	9.65e-06	0.0131723	0.0647383	0.258323	0.268403	0.0100795	0.248663	8926	0.0732552	FDR 5%	NAM_JL_26	δT, γT, ΣT, δT3, γT3, ΣT3, ΣTT3
αT		5_178646554	5	178646554	2.02e-05	0.0249931	0.0241047	0.258323	0.267674	0.00935033	0.318444	9839	0.0807481	FDR 5%
αT		5_183182466	5	183182466	1.17e-05	0.0155264	0.488292	0.258323	0.268216	0.00989296	-0.102401	9142	0.0750279	FDR 5%
αT		5_186290434	5	186290434	2.82e-05	0.0333189	0.0874656	0.258323	0.267343	0.00901941	0.17427	10327	0.0847531	FDR 5%
αT		5_186587072	5	186587072	7.54e-06	0.0106081	0.176997	0.258323	0.268647	0.0103239	0.130656	8660	0.0710721	FDR 5%
αT		5_188174941	5	188174941	4.26e-05	0.047335	0.400826	0.258323	0.266938	0.00861486	-0.101941	10972	0.0900466	FDR 5%
αT		5_191246491	5	191246491	4.54e-05	0.049881	0.163223	0.258323	0.266875	0.00855201	0.132892	11100	0.0910971	FDR 5%
αT		5_191246516	5	191246516	3.37e-05	0.0387466	0.161157	0.258323	0.26717	0.00884634	0.135754	10589	0.0869033	FDR 5%
αT		5_191254941	5	191254941	1.89e-05	0.0236604	0.247245	0.258323	0.267737	0.00941364	0.112531	9747	0.0799931	FDR 5%
αT		5_191255079	5	191255079	1.43e-05	0.0186321	0.221763	0.258323	0.268017	0.00969353	0.119201	9322	0.0765051	FDR 5%
αT		5_191255977	5	191255977	3.68e-06	0.00570709	0.221763	0.258323	0.269361	0.0110376	0.128309	7847	0.0643999	FDR 5%
αT		5_191256129	5	191256129	4.37e-06	0.00662661	0.216253	0.258323	0.269189	0.0108656	0.127654	8034	0.0659346	FDR 5%
αT		5_191256222	5	191256222	4.27e-06	0.00648386	0.207989	0.258323	0.269212	0.010889	0.128179	8020	0.0658197	FDR 5%
αT		5_191256231	5	191256231	4.88e-06	0.00727059	0.209366	0.258323	0.269078	0.0107553	0.128003	8162	0.0669851	FDR 5%
αT		5_191256537	5	191256537	3.98e-06	0.00609668	0.210055	0.258323	0.269282	0.0109592	0.129065	7948	0.0652288	FDR 5%
αT		5_191256649	5	191256649	5.01e-06	0.00741274	0.207989	0.258323	0.269054	0.0107306	0.128601	8227	0.0675185	FDR 5%
αT		5_191256825	5	191256825	6.97e-06	0.00989589	0.213499	0.258323	0.268725	0.0104016	0.125289	8584	0.0704484	FDR 5%
αT		5_191256943	5	191256943	5.94e-06	0.00858255	0.211433	0.258323	0.268883	0.0105602	0.125908	8435	0.0692256	FDR 5%
αT		5_191257881	5	191257881	7.51e-06	0.0105716	0.201791	0.258323	0.268651	0.0103278	0.126143	8656	0.0710393	FDR 5%
αT		5_191257961	5	191257961	1.4e-05	0.0183109	0.194904	0.258323	0.268035	0.00971209	0.124435	9309	0.0763984	FDR 5%
αT		5_191257966	5	191257966	1.85e-06	0.0030769	0.197658	0.258323	0.270045	0.011722	0.135991	7323	0.0600994	FDR 5%
αT		5_191258295	5	191258295	1.85e-06	0.0030769	0.197658	0.258323	0.270045	0.011722	0.135991	7324	0.0601077	FDR 5%
αT		5_191258524	5	191258524	3.49e-05	0.0399454	0.173554	0.258323	0.267134	0.00881075	0.123914	10650	0.0874039	FDR 5%
αT		5_191258569	5	191258569	2.74e-05	0.0324852	0.169421	0.258323	0.267372	0.00904846	0.125537	10284	0.0844002	FDR 5%
αT		5_191258792	5	191258792	3.41e-05	0.0390909	0.172865	0.258323	0.267158	0.00883487	0.125385	10619	0.0871495	FDR 5%
αT		5_191259811	5	191259811	1.62e-05	0.020653	0.136364	0.258323	0.267892	0.00956888	0.145711	9541	0.0783024	FDR 5%
αT		5_191260271	5	191260271	1.18e-05	0.0157391	0.137741	0.258323	0.268201	0.00987799	0.147339	9157	0.075151	FDR 5%
αT		5_191260664	5	191260664	2.57e-05	0.0307556	0.145317	0.258323	0.267436	0.00911283	0.138714	10174	0.0834974	FDR 5%
αT		5_191260677	5	191260677	1.69e-05	0.0214582	0.147383	0.258323	0.267847	0.00952411	0.140993	9608	0.0788523	FDR 5%
αT		5_191260694	5	191260694	1.69e-05	0.0214582	0.147383	0.258323	0.267847	0.00952411	0.140993	9609	0.0788605	FDR 5%
αT		5_191260976	5	191260976	3.16e-07	0.000590139	0.152204	0.258323	0.271816	0.0134929	0.163298	6520	0.0535093	FDR 5%
αT		5_191261216	5	191261216	1.92e-05	0.0239573	0.179752	0.258323	0.267723	0.00940013	0.126226	9759	0.0800916	FDR 5%
αT		5_191261271	5	191261271	1.44e-05	0.0188017	0.174242	0.258323	0.268007	0.00968341	0.129139	9333	0.0765954	FDR 5%
αT		5_191279859	5	191279859	2.86e-05	0.0336428	0.141873	0.258323	0.267331	0.00900827	0.138032	10344	0.0848926	FDR 5%
αT		5_191279886	5	191279886	2.86e-05	0.0336527	0.141185	0.258323	0.267331	0.00900789	0.138321	10345	0.0849008	FDR 5%
αT		5_191289317	5	191289317	8.51e-06	0.0118086	0.147383	0.258323	0.268527	0.0102036	0.143602	8784	0.0720898	FDR 5%
αT		5_191304671	5	191304671	2.34e-05	0.0283976	0.141873	0.258323	0.267526	0.00920316	0.14059	10054	0.0825126	FDR 5%
αT		5_191304711	5	191304711	2.08e-06	0.00342696	0.147383	0.258323	0.269929	0.0116062	0.154173	7385	0.0606083	FDR 5%
αT		5_192292813	5	192292813	3.51e-05	0.0401673	0.15427	0.258323	0.267128	0.00880475	-0.13654	10656	0.0874532	FDR 5%
αT		5_192304012	5	192304012	4.15e-05	0.0462774	0.0785124	0.258323	0.266964	0.00864074	-0.19513	10930	0.0897019	FDR 5%
αT		5_192470010	5	192470010	3.01e-05	0.0351536	0.077135	0.258323	0.26728	0.00895695	-0.203154	10428	0.085582	FDR 5%
αT		5_192495516	5	192495516	3.01e-05	0.0351536	0.077135	0.258323	0.26728	0.00895695	-0.203154	10429	0.0855902	FDR 5%
αT		5_192736712	5	192736712	2.72e-05	0.0322227	0.0943526	0.258323	0.267381	0.00905807	-0.185113	10266	0.0842525	FDR 5%
αT		5_192736972	5	192736972	2.72e-05	0.0322227	0.0943526	0.258323	0.267381	0.00905807	-0.185113	10267	0.0842607	FDR 5%
αT		5_192743399	5	192743399	5.66e-06	0.00823409	0.0736915	0.258323	0.268931	0.0106077	-0.216677	8382	0.0687906	FDR 5%
αT		5_192879244	5	192879244	2.35e-05	0.0284974	0.0998623	0.258323	0.267522	0.00919872	-0.177094	10064	0.0825947	FDR 5%
αT		5_192885099	5	192885099	1.92e-05	0.0240055	0.100551	0.258323	0.267721	0.00939774	-0.178416	9763	0.0801244	FDR 5%
αT		5_193490132	5	193490132	3.65e-05	0.0415459	0.158402	0.258323	0.267089	0.00876602	-0.134231	10716	0.0879456	FDR 5%
αT		5_193495326	5	193495326	9.65e-06	0.0131777	0.118457	0.258323	0.268402	0.0100789	-0.164621	8927	0.0732634	FDR 5%
αT		5_193495364	5	193495364	1.2e-05	0.0159517	0.11708	0.258323	0.268187	0.00986364	-0.167356	9167	0.075233	FDR 5%
αT		5_193495366	5	193495366	1.59e-05	0.02043	0.118457	0.258323	0.267906	0.00958271	-0.163506	9511	0.0780562	FDR 5%
αT		5_193495367	5	193495367	9.55e-06	0.0130586	0.118457	0.258323	0.268413	0.01009	-0.168347	8908	0.0731074	FDR 5%
αT		5_193495497	5	193495497	3.56e-06	0.00553874	0.119146	0.258323	0.269393	0.0110702	-0.175447	7825	0.0642193	FDR 5%
αT		5_193495568	5	193495568	1.96e-06	0.00324547	0.133609	0.258323	0.269989	0.0116659	-0.17023	7345	0.06028	FDR 5%
αT		5_193773022	5	193773022	3.1e-05	0.0361023	0.0833333	0.258323	0.267251	0.00892744	0.203556	10465	0.0858857	FDR 5%
αT		5_193879973	5	193879973	2.93e-05	0.0344386	0.265152	0.258323	0.267306	0.00898243	-0.108212	10373	0.0851306	FDR 5%
αT		5_193879982	5	193879982	3.75e-05	0.0425124	0.264463	0.258323	0.267064	0.00874056	-0.106863	10748	0.0882082	FDR 5%
αT		5_193880013	5	193880013	3.44e-05	0.0394185	0.264463	0.258323	0.267148	0.00882482	-0.106999	10639	0.0873137	FDR 5%
αT		5_193881492	5	193881492	2.72e-05	0.032293	0.262397	0.258323	0.267379	0.00905548	-0.109344	10270	0.0842853	FDR 5%
αT		5_193883126	5	193883126	3.93e-05	0.0442165	0.275482	0.258323	0.267018	0.0086944	-0.104534	10831	0.0888894	FDR 5%
αT		5_193883470	5	193883470	4.19e-05	0.0467039	0.264463	0.258323	0.266954	0.00863057	-0.106786	10943	0.0898086	FDR 5%
αT		5_193883570	5	193883570	2.95e-05	0.0346273	0.273416	0.258323	0.267298	0.00897477	-0.106319	10398	0.0853358	FDR 5%
αT		5_193927469	5	193927469	3.66e-05	0.04165	0.483471	0.258323	0.267086	0.00876316	0.0974977	10721	0.0879866	FDR 5%
αT		5_194071192	5	194071192	4.06e-05	0.0454161	0.259642	0.258323	0.266986	0.00866289	-0.106058	10888	0.0893572	FDR 5%
αT		5_194079653	5	194079653	3.56e-05	0.0406283	0.2927	0.258323	0.267115	0.00879225	-0.103136	10670	0.0875681	FDR 5%
αT		5_194301146	5	194301146	1.34e-05	0.0176212	0.386364	0.258323	0.268077	0.00975397	-0.102369	9272	0.0760948	FDR 5%
αT		5_194301304	5	194301304	7.04e-06	0.00998665	0.38292	0.258323	0.268715	0.0103922	-0.106377	8587	0.070473	FDR 5%
αT		5_194304068	5	194304068	4.12e-05	0.0459862	0.477273	0.258323	0.26697	0.00864726	0.0937932	10925	0.0896609	FDR 5%
αT		5_194468741	5	194468741	1.32e-07	0.000260014	0.042011	0.258323	0.272697	0.0143734	-0.329065	6172	0.0506533	FDR 5%
αT		5_194609055	5	194609055	1.13e-05	0.0150979	0.299587	0.258323	0.268249	0.00992629	-0.112636	9091	0.0746093	FDR 5%
αT		5_194705086	5	194705086	5.8e-06	0.0084032	0.457989	0.258323	0.268908	0.0105847	-0.107352	8406	0.0689876	FDR 5%
αT		5_194705206	5	194705206	1.71e-06	0.00286221	0.475895	0.258323	0.270122	0.0117987	-0.111688	7291	0.0598368	FDR 5%
αT		5_194761648	5	194761648	2.15e-05	0.0263652	0.323003	0.258323	0.267613	0.00928976	0.10622	9918	0.0813965	FDR 5%
αT		5_194761659	5	194761659	2.41e-05	0.0290255	0.328512	0.258323	0.2675	0.00917692	0.105263	10102	0.0829065	FDR 5%
αT		5_194761836	5	194761836	3.7e-05	0.0420232	0.326446	0.258323	0.267076	0.00875302	0.10477	10736	0.0881097	FDR 5%
αT		5_194860714	5	194860714	2.93e-06	0.00467923	0.110193	0.258323	0.269585	0.0112623	-0.172281	7637	0.0626764	FDR 5%
αT		5_194864541	5	194864541	3.85e-05	0.0434524	0.0406336	0.258323	0.267037	0.0087137	-0.265488	10807	0.0886924	FDR 5%
αT		5_194926662	5	194926662	2.66e-05	0.0316654	0.0413223	0.258323	0.267401	0.00907832	-0.276392	10234	0.0839899	FDR 5%
αT		5_194926722	5	194926722	2.66e-05	0.0316654	0.0413223	0.258323	0.267401	0.00907832	-0.276392	10235	0.0839981	FDR 5%
αT		5_194928602	5	194928602	3.63e-05	0.0413158	0.230028	0.258323	0.267096	0.00877245	-0.116081	10706	0.0878635	FDR 5%
αT		5_194989550	5	194989550	4.77e-06	0.00713311	0.0316804	0.258323	0.269103	0.0107793	-0.357969	8140	0.0668045	FDR 5%
αT		5_195166653	5	195166653	2.98e-06	0.00473619	0.0158402	0.258323	0.269571	0.011248	-0.356473	7654	0.0628159	FDR 5%
αT		5_195167283	5	195167283	4.44e-08	9.43e-05	0.0309917	0.258323	0.273796	0.0154724	-0.447043	5733	0.0470504	FDR 5%
αT		5_195169511	5	195169511	1.87e-08	4.22e-05	0.030303	0.258323	0.274672	0.0163489	-0.470479	5394	0.0442683	FDR 5%
αT		5_195178696	5	195178696	3.89e-05	0.0438334	0.109504	0.258323	0.267027	0.00870395	0.151391	10820	0.0887991	FDR 5%
αT		5_195324846	5	195324846	2.45e-06	0.00397419	0.0502755	0.258323	0.269765	0.0114421	-0.268183	7507	0.0616095	FDR 5%
αT		5_195362782	5	195362782	7.4e-06	0.0104197	0.0523416	0.258323	0.268666	0.0103431	-0.251408	8647	0.0709654	FDR 5%	NAM_JL_27	δT
αT		5_195394469	5	195394469	4.96e-06	0.00734339	0.480028	0.258323	0.269064	0.0107405	0.109142	8222	0.0674775	FDR 5%	NAM_JL_27	δT
αT		5_195394584	5	195394584	1.93e-05	0.0241149	0.426997	0.258323	0.267715	0.00939204	0.103828	9775	0.0802229	FDR 5%	NAM_JL_27	δT
αT		5_195432758	5	195432758	3.5e-05	0.0400281	0.479339	0.258323	0.267132	0.00880845	0.103144	10652	0.0874204	FDR 5%	NAM_JL_27	δT
αT		5_195432781	5	195432781	2.65e-05	0.0315542	0.429063	0.258323	0.267406	0.00908255	0.106093	10227	0.0839324	FDR 5%	NAM_JL_27	δT
αT		5_195432851	5	195432851	1.99e-05	0.0247266	0.477273	0.258323	0.267686	0.00936285	0.1057	9819	0.080584	FDR 5%	NAM_JL_27	δT
αT		5_195432930	5	195432930	2.27e-05	0.0276284	0.479339	0.258323	0.267558	0.00923512	0.105359	10004	0.0821023	FDR 5%	NAM_JL_27	δT
αT		5_195432956	5	195432956	3.65e-05	0.0414857	0.47865	0.258323	0.267091	0.00876759	0.102767	10715	0.0879374	FDR 5%	NAM_JL_27	δT
αT		5_195432973	5	195432973	4.29e-05	0.0475722	0.480028	0.258323	0.266932	0.00860837	0.102247	10982	0.0901286	FDR 5%	NAM_JL_27	δT
αT		5_195433031	5	195433031	4.29e-05	0.0475722	0.480028	0.258323	0.266932	0.00860837	0.102247	10983	0.0901369	FDR 5%	NAM_JL_27	δT
αT		5_195433035	5	195433035	4.29e-05	0.0475722	0.480028	0.258323	0.266932	0.00860837	0.102247	10984	0.0901451	FDR 5%	NAM_JL_27	δT
αT		5_195433084	5	195433084	3.27e-05	0.0377769	0.429752	0.258323	0.2672	0.00887656	0.10517	10532	0.0864355	FDR 5%	NAM_JL_27	δT
αT		5_195433100	5	195433100	3.93e-05	0.0442248	0.427686	0.258323	0.267017	0.00869413	0.103657	10832	0.0888976	FDR 5%	NAM_JL_27	δT
αT		5_195433102	5	195433102	4.29e-05	0.0475722	0.480028	0.258323	0.266932	0.00860837	0.102247	10985	0.0901533	FDR 5%	NAM_JL_27	δT
αT		5_195433105	5	195433105	4.29e-05	0.0475722	0.480028	0.258323	0.266932	0.00860837	0.102247	10986	0.0901615	FDR 5%	NAM_JL_27	δT
αT		5_195433138	5	195433138	4.29e-05	0.0475722	0.480028	0.258323	0.266932	0.00860837	0.102247	10987	0.0901697	FDR 5%	NAM_JL_27	δT
αT		5_195433148	5	195433148	2.59e-05	0.0309353	0.475895	0.258323	0.267429	0.0091063	0.105652	10183	0.0835713	FDR 5%	NAM_JL_27	δT
αT		5_195433167	5	195433167	4.29e-05	0.0475722	0.480028	0.258323	0.266932	0.00860837	0.102247	10988	0.0901779	FDR 5%	NAM_JL_27	δT
αT		5_195433168	5	195433168	4.29e-05	0.0475722	0.480028	0.258323	0.266932	0.00860837	0.102247	10989	0.0901861	FDR 5%	NAM_JL_27	δT
αT		5_195433229	5	195433229	4.24e-05	0.0471029	0.486226	0.258323	0.266944	0.00862079	0.101888	10959	0.0899399	FDR 5%	NAM_JL_27	δT
αT		5_195433269	5	195433269	3.96e-05	0.0444453	0.486915	0.258323	0.267011	0.00868743	0.102251	10841	0.0889715	FDR 5%	NAM_JL_27	δT
αT		5_195433311	5	195433311	3.96e-05	0.0444453	0.486915	0.258323	0.267011	0.00868743	0.102251	10842	0.0889797	FDR 5%	NAM_JL_27	δT
αT		5_195433331	5	195433331	3.96e-05	0.0444453	0.486915	0.258323	0.267011	0.00868743	0.102251	10843	0.0889879	FDR 5%	NAM_JL_27	δT
αT		5_195433503	5	195433503	3.96e-05	0.0444453	0.486915	0.258323	0.267011	0.00868743	0.102251	10844	0.0889961	FDR 5%	NAM_JL_27	δT
αT		5_195433505	5	195433505	3.96e-05	0.0444453	0.486915	0.258323	0.267011	0.00868743	0.102251	10845	0.0890043	FDR 5%	NAM_JL_27	δT
αT		5_195433617	5	195433617	6.79e-06	0.00966981	0.486915	0.258323	0.268752	0.0104284	0.11184	8550	0.0701694	FDR 5%	NAM_JL_27	δT
αT		5_195433662	5	195433662	7.06e-06	0.0100056	0.488292	0.258323	0.268713	0.0103896	0.11122	8590	0.0704976	FDR 5%	NAM_JL_27	δT
αT		5_195433688	5	195433688	7.06e-06	0.0100056	0.488292	0.258323	0.268713	0.0103896	0.11122	8591	0.0705058	FDR 5%	NAM_JL_27	δT
αT		5_195433706	5	195433706	8.09e-06	0.0112805	0.486915	0.258323	0.268577	0.0102541	0.109978	8737	0.0717041	FDR 5%	NAM_JL_27	δT
αT		5_195433710	5	195433710	7.06e-06	0.0100056	0.488292	0.258323	0.268713	0.0103896	0.11122	8592	0.0705141	FDR 5%	NAM_JL_27	δT
αT		5_195433736	5	195433736	7.06e-06	0.0100056	0.488292	0.258323	0.268713	0.0103896	0.11122	8593	0.0705223	FDR 5%	NAM_JL_27	δT
αT		5_195433762	5	195433762	3.75e-05	0.0425449	0.438017	0.258323	0.267063	0.00873953	0.102482	10751	0.0882328	FDR 5%	NAM_JL_27	δT
αT		5_195433763	5	195433763	4.12e-05	0.045973	0.489669	0.258323	0.266971	0.00864776	0.101445	10924	0.0896526	FDR 5%	NAM_JL_27	δT
αT		5_195433775	5	195433775	1.9e-05	0.0237847	0.490358	0.258323	0.267731	0.00940776	0.105133	9754	0.0800505	FDR 5%	NAM_JL_27	δT
αT		5_195433777	5	195433777	2.26e-06	0.0037103	0.491047	0.258323	0.269844	0.0115207	0.116691	7432	0.060994	FDR 5%	NAM_JL_27	δT
αT		5_195433784	5	195433784	1.67e-05	0.0212507	0.491736	0.258323	0.267858	0.00953514	0.106346	9594	0.0787374	FDR 5%	NAM_JL_27	δT
αT		5_195433787	5	195433787	1.67e-05	0.0212507	0.491736	0.258323	0.267858	0.00953514	0.106346	9595	0.0787456	FDR 5%	NAM_JL_27	δT
αT		5_195433789	5	195433789	3.85e-05	0.0434213	0.490358	0.258323	0.267039	0.0087154	0.101819	10796	0.0886022	FDR 5%	NAM_JL_27	δT
αT		5_195433841	5	195433841	3.13e-05	0.0363487	0.440083	0.258323	0.267243	0.00891961	0.103949	10477	0.0859841	FDR 5%	NAM_JL_27	δT
αT		5_195433963	5	195433963	5e-06	0.0074115	0.440083	0.258323	0.269054	0.0107309	0.114228	8226	0.0675103	FDR 5%	NAM_JL_27	δT
αT		5_195433968	5	195433968	6.39e-06	0.00916776	0.490358	0.258323	0.268811	0.0104882	0.111896	8491	0.0696852	FDR 5%	NAM_JL_27	δT
αT		5_195433987	5	195433987	1.07e-05	0.0144595	0.488981	0.258323	0.268298	0.0099746	0.109181	9039	0.0741826	FDR 5%	NAM_JL_27	δT
αT		5_195434019	5	195434019	1.07e-05	0.0144595	0.488981	0.258323	0.268298	0.0099746	0.109181	9040	0.0741908	FDR 5%	NAM_JL_27	δT
αT		5_195434111	5	195434111	8.85e-06	0.0121819	0.495179	0.258323	0.268489	0.0101655	0.109635	8848	0.072615	FDR 5%	NAM_JL_27	δT
αT		5_195434114	5	195434114	8.85e-06	0.0121819	0.495179	0.258323	0.268489	0.0101655	0.109635	8849	0.0726232	FDR 5%	NAM_JL_27	δT
αT		5_195434263	5	195434263	3.84e-05	0.0433754	0.497245	0.258323	0.26704	0.00871662	0.10253	10792	0.0885693	FDR 5%	NAM_JL_27	δT
αT		5_195434268	5	195434268	3.84e-05	0.0433754	0.497245	0.258323	0.26704	0.00871662	0.10253	10793	0.0885775	FDR 5%	NAM_JL_27	δT
αT		5_195434296	5	195434296	3.84e-05	0.0433754	0.497245	0.258323	0.26704	0.00871662	0.10253	10794	0.0885857	FDR 5%	NAM_JL_27	δT
αT		5_195434340	5	195434340	2.38e-05	0.0288286	0.451791	0.258323	0.267509	0.00918587	0.106489	10079	0.0827178	FDR 5%	NAM_JL_27	δT
αT		5_195434354	5	195434354	1.47e-05	0.0191506	0.488981	0.258323	0.267986	0.00966249	0.107074	9359	0.0768088	FDR 5%	NAM_JL_27	δT
αT		5_195434357	5	195434357	1.56e-05	0.0201808	0.487603	0.258323	0.267928	0.00960485	0.106698	9415	0.0772684	FDR 5%	NAM_JL_27	δT
αT		5_195434405	5	195434405	3.03e-05	0.0354213	0.499311	0.258323	0.267272	0.00894898	0.103996	10435	0.0856395	FDR 5%	NAM_JL_27	δT
αT		5_195434444	5	195434444	6.84e-06	0.0097322	0.487603	0.258323	0.268744	0.010421	0.111491	8558	0.070235	FDR 5%	NAM_JL_27	δT
αT		5_195434464	5	195434464	3.87e-06	0.00595991	0.488292	0.258323	0.26931	0.0109873	0.114155	7904	0.0648677	FDR 5%	NAM_JL_27	δT
αT		5_195434512	5	195434512	6.6e-06	0.00943114	0.495868	0.258323	0.26878	0.0104565	0.110797	8522	0.0699396	FDR 5%	NAM_JL_27	δT
αT		5_195434525	5	195434525	6.84e-06	0.0097322	0.487603	0.258323	0.268744	0.010421	0.111491	8559	0.0702432	FDR 5%	NAM_JL_27	δT
αT		5_195434547	5	195434547	2.05e-05	0.0253161	0.436639	0.258323	0.267659	0.00933565	0.106748	9855	0.0808794	FDR 5%	NAM_JL_27	δT
αT		5_195434599	5	195434599	3.96e-05	0.0444453	0.486915	0.258323	0.267011	0.00868743	0.102251	10846	0.0890125	FDR 5%	NAM_JL_27	δT
αT		5_195434615	5	195434615	3.96e-05	0.0444453	0.486915	0.258323	0.267011	0.00868743	0.102251	10847	0.0890207	FDR 5%	NAM_JL_27	δT
αT		5_195434829	5	195434829	3.36e-05	0.0386717	0.485537	0.258323	0.267172	0.00884834	0.102786	10588	0.0868951	FDR 5%	NAM_JL_27	δT
αT		5_195434857	5	195434857	9.35e-06	0.0128149	0.488981	0.258323	0.268433	0.0101101	0.110376	8895	0.0730008	FDR 5%	NAM_JL_27	δT
αT		5_195434918	5	195434918	3.85e-05	0.0434222	0.487603	0.258323	0.267038	0.0087146	0.102379	10801	0.0886432	FDR 5%	NAM_JL_27	δT
αT		5_195434940	5	195434940	2.98e-05	0.0349067	0.488292	0.258323	0.267288	0.00896526	0.103781	10415	0.0854753	FDR 5%	NAM_JL_27	δT
αT		5_195435019	5	195435019	2.62e-05	0.0313003	0.486226	0.258323	0.267416	0.00909301	0.10461	10201	0.083719	FDR 5%	NAM_JL_27	δT
αT		5_195435047	5	195435047	3.96e-05	0.0444453	0.486915	0.258323	0.267011	0.00868743	0.102251	10848	0.0890289	FDR 5%	NAM_JL_27	δT
αT		5_195435049	5	195435049	3.96e-05	0.0444453	0.486915	0.258323	0.267011	0.00868743	0.102251	10849	0.0890371	FDR 5%	NAM_JL_27	δT
αT		5_195435050	5	195435050	3.96e-05	0.0444453	0.486915	0.258323	0.267011	0.00868743	0.102251	10850	0.0890453	FDR 5%	NAM_JL_27	δT
αT		5_195435109	5	195435109	3.85e-05	0.0434222	0.487603	0.258323	0.267038	0.0087146	0.102379	10802	0.0886514	FDR 5%	NAM_JL_27	δT
αT		5_195435114	5	195435114	3.85e-05	0.0434222	0.487603	0.258323	0.267038	0.0087146	0.102379	10803	0.0886596	FDR 5%	NAM_JL_27	δT
αT		5_195435117	5	195435117	3.85e-05	0.0434222	0.487603	0.258323	0.267038	0.0087146	0.102379	10804	0.0886678	FDR 5%	NAM_JL_27	δT
αT		5_195435125	5	195435125	3.85e-05	0.0434222	0.487603	0.258323	0.267038	0.0087146	0.102379	10805	0.088676	FDR 5%	NAM_JL_27	δT
αT		5_195435129	5	195435129	4.12e-05	0.0459631	0.486915	0.258323	0.266971	0.00864815	0.102019	10922	0.0896362	FDR 5%	NAM_JL_27	δT
αT		5_195435222	5	195435222	3.96e-05	0.0444453	0.486915	0.258323	0.267011	0.00868743	0.102251	10851	0.0890535	FDR 5%	NAM_JL_27	δT
αT		5_195435228	5	195435228	3.96e-05	0.0444453	0.486915	0.258323	0.267011	0.00868743	0.102251	10852	0.0890617	FDR 5%	NAM_JL_27	δT
αT		5_195435236	5	195435236	3.25e-05	0.0375805	0.486226	0.258323	0.267206	0.00888234	0.103081	10525	0.0863781	FDR 5%	NAM_JL_27	δT
αT		5_195435303	5	195435303	4.34e-05	0.0479638	0.488981	0.258323	0.266921	0.00859792	0.101035	11016	0.0904077	FDR 5%	NAM_JL_27	δT
αT		5_195435348	5	195435348	1.44e-05	0.0187589	0.484848	0.258323	0.268009	0.00968597	0.107309	9329	0.0765626	FDR 5%	NAM_JL_27	δT
αT		5_195435399	5	195435399	1.44e-05	0.0187589	0.484848	0.258323	0.268009	0.00968597	0.107309	9330	0.0765708	FDR 5%	NAM_JL_27	δT
αT		5_195435456	5	195435456	1.6e-05	0.0204826	0.486226	0.258323	0.267902	0.00957924	0.105942	9520	0.0781301	FDR 5%	NAM_JL_27	δT
αT		5_195435473	5	195435473	1.75e-05	0.0220972	0.486915	0.258323	0.267813	0.00948987	0.106412	9659	0.0792709	FDR 5%	NAM_JL_27	δT
αT		5_195435478	5	195435478	1.75e-05	0.0220972	0.486915	0.258323	0.267813	0.00948987	0.106412	9660	0.0792791	FDR 5%	NAM_JL_27	δT
αT		5_195452576	5	195452576	3.85e-05	0.0434265	0.49449	0.258323	0.267038	0.00871438	0.101275	10806	0.0886842	FDR 5%	NAM_JL_27	δT
αT		5_195452815	5	195452815	4.19e-05	0.0466929	0.409091	0.258323	0.266954	0.00863089	0.102652	10942	0.0898004	FDR 5%	NAM_JL_27	δT
αT		5_195452876	5	195452876	3e-05	0.0350548	0.486226	0.258323	0.267283	0.00896015	0.103043	10425	0.0855574	FDR 5%	NAM_JL_27	δT
αT		5_195452914	5	195452914	4.04e-05	0.0452469	0.48416	0.258323	0.266991	0.00866744	0.100907	10879	0.0892833	FDR 5%	NAM_JL_27	δT
αT		5_195452918	5	195452918	3.58e-05	0.0408092	0.485537	0.258323	0.267109	0.00878586	0.102076	10687	0.0877076	FDR 5%	NAM_JL_27	δT
αT		5_195452919	5	195452919	3.58e-05	0.0408092	0.485537	0.258323	0.267109	0.00878586	0.102076	10688	0.0877158	FDR 5%	NAM_JL_27	δT
αT		5_195452929	5	195452929	2.31e-05	0.0280635	0.486226	0.258323	0.26754	0.00921668	0.104414	10031	0.0823238	FDR 5%	NAM_JL_27	δT
αT		5_195452935	5	195452935	2.31e-05	0.0280635	0.486226	0.258323	0.26754	0.00921668	0.104414	10032	0.0823321	FDR 5%	NAM_JL_27	δT
αT		5_195452942	5	195452942	2.31e-05	0.0280635	0.486226	0.258323	0.26754	0.00921668	0.104414	10033	0.0823403	FDR 5%	NAM_JL_27	δT
αT		5_195452957	5	195452957	2.31e-05	0.0280635	0.486226	0.258323	0.26754	0.00921668	0.104414	10034	0.0823485	FDR 5%	NAM_JL_27	δT
αT		5_195452959	5	195452959	2.31e-05	0.0280635	0.486226	0.258323	0.26754	0.00921668	0.104414	10035	0.0823567	FDR 5%	NAM_JL_27	δT
αT		5_195452991	5	195452991	3.32e-05	0.038295	0.488292	0.258323	0.267183	0.00886019	0.103098	10558	0.0866489	FDR 5%	NAM_JL_27	δT
αT		5_195452996	5	195452996	3.32e-05	0.038295	0.488292	0.258323	0.267183	0.00886019	0.103098	10559	0.0866571	FDR 5%	NAM_JL_27	δT
αT		5_195453021	5	195453021	3.32e-05	0.038295	0.488292	0.258323	0.267183	0.00886019	0.103098	10560	0.0866653	FDR 5%	NAM_JL_27	δT
αT		5_195453031	5	195453031	3.07e-05	0.035818	0.436639	0.258323	0.267259	0.00893605	0.105023	10456	0.0858118	FDR 5%	NAM_JL_27	δT
αT		5_195453039	5	195453039	3.32e-05	0.038295	0.488292	0.258323	0.267183	0.00886019	0.103098	10561	0.0866735	FDR 5%	NAM_JL_27	δT
αT		5_195453052	5	195453052	3.32e-05	0.038295	0.488292	0.258323	0.267183	0.00886019	0.103098	10562	0.0866817	FDR 5%	NAM_JL_27	δT
αT		5_195453058	5	195453058	3.32e-05	0.038295	0.488292	0.258323	0.267183	0.00886019	0.103098	10563	0.0866899	FDR 5%	NAM_JL_27	δT
αT		5_195453074	5	195453074	3.32e-05	0.038295	0.488292	0.258323	0.267183	0.00886019	0.103098	10564	0.0866981	FDR 5%	NAM_JL_27	δT
αT		5_195453125	5	195453125	3.58e-05	0.0408092	0.485537	0.258323	0.267109	0.00878586	0.102076	10689	0.087724	FDR 5%	NAM_JL_27	δT
αT		5_195453151	5	195453151	3.58e-05	0.0408092	0.485537	0.258323	0.267109	0.00878586	0.102076	10690	0.0877322	FDR 5%	NAM_JL_27	δT
αT		5_195453154	5	195453154	3.58e-05	0.0408092	0.485537	0.258323	0.267109	0.00878586	0.102076	10691	0.0877404	FDR 5%	NAM_JL_27	δT
αT		5_195453187	5	195453187	3.58e-05	0.0408092	0.485537	0.258323	0.267109	0.00878586	0.102076	10692	0.0877486	FDR 5%	NAM_JL_27	δT
αT		5_195453227	5	195453227	4.44e-05	0.0489791	0.433884	0.258323	0.266897	0.00857408	0.102172	11052	0.0907031	FDR 5%	NAM_JL_27	δT
αT		5_195453233	5	195453233	4.44e-05	0.0489791	0.433884	0.258323	0.266897	0.00857408	0.102172	11053	0.0907113	FDR 5%	NAM_JL_27	δT
αT		5_195453408	5	195453408	4.22e-05	0.0469355	0.486915	0.258323	0.266948	0.00862491	0.101531	10950	0.089866	FDR 5%	NAM_JL_27	δT
αT		5_195453421	5	195453421	4.22e-05	0.0469355	0.486915	0.258323	0.266948	0.00862491	0.101531	10951	0.0898742	FDR 5%	NAM_JL_27	δT
αT		5_195453472	5	195453472	4.22e-05	0.0469355	0.486915	0.258323	0.266948	0.00862491	0.101531	10952	0.0898824	FDR 5%	NAM_JL_27	δT
αT		5_195453532	5	195453532	4.36e-05	0.0482156	0.486226	0.258323	0.266915	0.0085918	0.101241	11023	0.0904651	FDR 5%	NAM_JL_27	δT
αT		5_195453541	5	195453541	4.36e-05	0.0482156	0.486226	0.258323	0.266915	0.0085918	0.101241	11024	0.0904733	FDR 5%	NAM_JL_27	δT
αT		5_195453627	5	195453627	3.39e-05	0.038982	0.480716	0.258323	0.267162	0.00883854	0.103187	10609	0.0870675	FDR 5%	NAM_JL_27	δT
αT		5_195453889	5	195453889	4.1e-05	0.0458349	0.487603	0.258323	0.266975	0.00865179	0.101656	10912	0.0895542	FDR 5%	NAM_JL_27	δT
αT		5_195454151	5	195454151	3.39e-05	0.038947	0.488292	0.258323	0.267163	0.00883985	0.102431	10604	0.0870264	FDR 5%	NAM_JL_27	δT
αT		5_195454236	5	195454236	4.36e-05	0.0482156	0.486226	0.258323	0.266915	0.0085918	0.101241	11025	0.0904815	FDR 5%	NAM_JL_27	δT
αT		5_195454237	5	195454237	4.36e-05	0.0482156	0.486226	0.258323	0.266915	0.0085918	0.101241	11026	0.0904898	FDR 5%	NAM_JL_27	δT
αT		5_195454259	5	195454259	4.36e-05	0.0482156	0.486226	0.258323	0.266915	0.0085918	0.101241	11027	0.090498	FDR 5%	NAM_JL_27	δT
αT		5_195454337	5	195454337	2.73e-05	0.0323599	0.438017	0.258323	0.267376	0.00905284	0.105083	10278	0.084351	FDR 5%	NAM_JL_27	δT
αT		5_195454342	5	195454342	3.29e-05	0.0380629	0.43595	0.258323	0.267191	0.00886822	0.103575	10542	0.0865176	FDR 5%	NAM_JL_27	δT
αT		5_195454380	5	195454380	2.91e-05	0.0342452	0.437328	0.258323	0.267312	0.00898901	0.104769	10363	0.0850486	FDR 5%	NAM_JL_27	δT
αT		5_195454413	5	195454413	3.86e-05	0.0435553	0.489669	0.258323	0.267034	0.0087112	0.101952	10809	0.0887088	FDR 5%	NAM_JL_27	δT
αT		5_195454423	5	195454423	3.57e-05	0.0407117	0.438017	0.258323	0.267112	0.00878922	0.103903	10681	0.0876584	FDR 5%	NAM_JL_27	δT
αT		5_195644765	5	195644765	1.14e-05	0.0152786	0.160468	0.258323	0.268236	0.00991267	0.140306	9108	0.0747488	FDR 5%	NAM_JL_27	δT
αT		5_195644794	5	195644794	1.56e-05	0.0201808	0.161157	0.258323	0.267928	0.00960495	0.137363	9414	0.0772602	FDR 5%	NAM_JL_27	δT
αT		5_195645300	5	195645300	8.81e-06	0.0121363	0.161846	0.258323	0.268493	0.0101701	0.141101	8830	0.0724673	FDR 5%	NAM_JL_27	δT
αT		5_195645575	5	195645575	8.09e-06	0.0112805	0.302342	0.258323	0.268577	0.0102541	0.112125	8738	0.0717123	FDR 5%	NAM_JL_27	δT
αT		5_195645688	5	195645688	6.39e-06	0.00916761	0.161157	0.258323	0.268812	0.0104884	0.144064	8489	0.0696687	FDR 5%	NAM_JL_27	δT
αT		5_195646169	5	195646169	8.81e-06	0.0121363	0.161846	0.258323	0.268493	0.0101701	0.141101	8831	0.0724755	FDR 5%	NAM_JL_27	δT
αT		5_195646317	5	195646317	8.81e-06	0.0121363	0.161846	0.258323	0.268493	0.0101701	0.141101	8832	0.0724837	FDR 5%	NAM_JL_27	δT
αT		5_195646397	5	195646397	8.81e-06	0.0121363	0.161846	0.258323	0.268493	0.0101701	0.141101	8833	0.0724919	FDR 5%	NAM_JL_27	δT
αT		5_195646435	5	195646435	8.81e-06	0.0121363	0.161846	0.258323	0.268493	0.0101701	0.141101	8834	0.0725001	FDR 5%	NAM_JL_27	δT
αT		5_195646480	5	195646480	8.81e-06	0.0121363	0.161846	0.258323	0.268493	0.0101701	0.141101	8835	0.0725083	FDR 5%	NAM_JL_27	δT
αT		5_195646550	5	195646550	8.81e-06	0.0121363	0.161846	0.258323	0.268493	0.0101701	0.141101	8836	0.0725165	FDR 5%	NAM_JL_27	δT
αT		5_195646639	5	195646639	8.81e-06	0.0121363	0.161846	0.258323	0.268493	0.0101701	0.141101	8837	0.0725248	FDR 5%	NAM_JL_27	δT
αT		5_195646792	5	195646792	1.9e-05	0.0237686	0.165978	0.258323	0.267732	0.00940873	0.133205	9751	0.0800259	FDR 5%	NAM_JL_27	δT
αT		5_195646850	5	195646850	6.39e-06	0.00916761	0.161157	0.258323	0.268812	0.0104884	0.144064	8490	0.0696769	FDR 5%	NAM_JL_27	δT
αT		5_195646873	5	195646873	1.13e-05	0.0151124	0.172176	0.258323	0.268248	0.00992501	0.135473	9094	0.0746339	FDR 5%	NAM_JL_27	δT
αT		5_195713888	5	195713888	4.22e-05	0.0469812	0.166667	0.258323	0.266947	0.0086236	0.128514	10956	0.0899153	FDR 5%	NAM_JL_27	δT
αT		5_195806368	5	195806368	3.5e-05	0.0400039	0.428375	0.258323	0.267132	0.00880922	0.0942033	10651	0.0874121	FDR 5%	NAM_JL_27	δT
αT		5_195806388	5	195806388	4.44e-05	0.0489461	0.440083	0.258323	0.266898	0.00857527	0.0915533	11047	0.0906621	FDR 5%	NAM_JL_27	δT
αT		5_196072160	5	196072160	4.49e-05	0.0493566	0.289945	0.258323	0.266888	0.00856477	0.106881	11073	0.0908755	FDR 5%	NAM_JL_27	δT
αT		5_196085103	5	196085103	3.08e-05	0.0358881	0.30303	0.258323	0.267257	0.00893384	0.112135	10459	0.0858364	FDR 5%	NAM_JL_27	δT
αT		5_196090049	5	196090049	1.39e-05	0.0182403	0.318871	0.258323	0.268039	0.00971601	0.114377	9308	0.0763902	FDR 5%	NAM_JL_27	δT
αT		5_196091155	5	196091155	2.89e-05	0.034046	0.334022	0.258323	0.267319	0.00899551	0.105947	10355	0.0849829	FDR 5%	NAM_JL_27	δT
αT		5_196091432	5	196091432	3.89e-05	0.0438563	0.315427	0.258323	0.267027	0.00870334	0.108908	10821	0.0888073	FDR 5%	NAM_JL_27	δT
αT		5_196091435	5	196091435	4.09e-05	0.0456985	0.310606	0.258323	0.266978	0.00865526	0.109063	10906	0.0895049	FDR 5%	NAM_JL_27	δT
αT		5_196091501	5	196091501	1.86e-05	0.0233329	0.306474	0.258323	0.267752	0.00942861	0.114534	9735	0.0798946	FDR 5%	NAM_JL_27	δT
αT		5_196733148	5	196733148	7.53e-06	0.0105951	0.128099	0.258323	0.268648	0.0103253	-0.153867	8659	0.0710639	FDR 5%	NAM_JL_27	δT
αT		5_196734997	5	196734997	4.09e-05	0.0456573	0.152893	0.258323	0.266979	0.00865623	0.148126	10905	0.0894967	FDR 5%	NAM_JL_27	δT
αT		5_196741262	5	196741262	2.61e-08	5.76e-05	0.371901	0.258323	0.274334	0.0160104	0.134168	5524	0.0453352	FDR 5%	NAM_JL_27	δT
αT		5_196741818	5	196741818	3.88e-05	0.0437467	0.411846	0.258323	0.26703	0.00870653	0.0951614	10813	0.0887417	FDR 5%	NAM_JL_27	δT
αT		5_196741831	5	196741831	1.15e-05	0.0153214	0.444904	0.258323	0.268232	0.00990914	0.101036	9115	0.0748063	FDR 5%	NAM_JL_27	δT
αT		5_196741842	5	196741842	5.01e-07	0.000910673	0.355372	0.258323	0.271352	0.0130293	0.124814	6703	0.0550111	FDR 5%	NAM_JL_27	δT
αT		5_196742073	5	196742073	8.96e-07	0.00157164	0.378099	0.258323	0.270769	0.0124462	0.117678	6949	0.05703	FDR 5%	NAM_JL_27	δT
αT		5_196742623	5	196742623	3.69e-05	0.041918	0.172176	0.258323	0.267079	0.00875585	0.138364	10729	0.0880523	FDR 5%	NAM_JL_27	δT
αT		5_196742647	5	196742647	3.69e-05	0.041918	0.172176	0.258323	0.267079	0.00875585	0.138364	10730	0.0880605	FDR 5%	NAM_JL_27	δT
αT		5_196742761	5	196742761	3.69e-05	0.041918	0.172176	0.258323	0.267079	0.00875585	0.138364	10731	0.0880687	FDR 5%	NAM_JL_27	δT
αT		5_196742769	5	196742769	3.69e-05	0.041918	0.172176	0.258323	0.267079	0.00875585	0.138364	10732	0.0880769	FDR 5%	NAM_JL_27	δT
αT		5_196747857	5	196747857	2.58e-05	0.0309305	0.129477	0.258323	0.26743	0.00910659	0.159943	10181	0.0835549	FDR 5%	NAM_JL_27	δT
αT		5_196747862	5	196747862	2.82e-05	0.0333001	0.128788	0.258323	0.267343	0.00902014	0.160967	10325	0.0847367	FDR 5%	NAM_JL_27	δT
αT		5_196749744	5	196749744	2.85e-05	0.0335974	0.141185	0.258323	0.267333	0.00900979	0.15261	10341	0.084868	FDR 5%	NAM_JL_27	δT
αT		5_196749872	5	196749872	2.85e-05	0.0335974	0.141185	0.258323	0.267333	0.00900979	0.15261	10342	0.0848762	FDR 5%	NAM_JL_27	δT
αT		5_196751118	5	196751118	3.74e-05	0.0423808	0.141185	0.258323	0.267067	0.00874379	0.150478	10746	0.0881918	FDR 5%	NAM_JL_27	δT
αT		5_196751464	5	196751464	2.63e-05	0.0314132	0.140496	0.258323	0.267412	0.00908845	0.153694	10208	0.0837765	FDR 5%	NAM_JL_27	δT
αT		5_196751584	5	196751584	2.63e-05	0.0314132	0.140496	0.258323	0.267412	0.00908845	0.153694	10209	0.0837847	FDR 5%	NAM_JL_27	δT
αT		5_196751706	5	196751706	2.63e-05	0.0314132	0.140496	0.258323	0.267412	0.00908845	0.153694	10210	0.0837929	FDR 5%	NAM_JL_27	δT
αT		5_196752630	5	196752630	2.63e-05	0.0314132	0.140496	0.258323	0.267412	0.00908845	0.153694	10211	0.0838011	FDR 5%	NAM_JL_27	δT
αT		5_196931960	5	196931960	3.07e-05	0.0357574	0.202479	0.258323	0.267261	0.00893797	0.126476	10454	0.0857954	FDR 5%	NAM_JL_27	δT
αT		5_196933671	5	196933671	9.09e-06	0.0124866	0.178375	0.258323	0.268461	0.0101383	0.143566	8873	0.0728202	FDR 5%	NAM_JL_27	δT
αT		5_196933894	5	196933894	8.05e-06	0.0112294	0.169421	0.258323	0.268582	0.0102589	0.151259	8736	0.0716959	FDR 5%	NAM_JL_27	δT
αT		5_196934338	5	196934338	4.19e-06	0.00638326	0.197658	0.258323	0.26923	0.0109069	0.144392	8001	0.0656638	FDR 5%	NAM_JL_27	δT
αT		5_196937174	5	196937174	3.46e-05	0.0396407	0.139118	0.258323	0.267142	0.00881874	0.1572	10645	0.0873629	FDR 5%	NAM_JL_27	δT
αT		5_196953062	5	196953062	1.61e-05	0.0205607	0.135675	0.258323	0.267898	0.00957472	0.171538	9526	0.0781793	FDR 5%	NAM_JL_27	δT
αT		5_196953357	5	196953357	2.06e-05	0.0254541	0.136364	0.258323	0.267652	0.00932921	0.167684	9870	0.0810025	FDR 5%	NAM_JL_27	δT
αT		5_196961432	5	196961432	3.13e-05	0.0364035	0.171488	0.258323	0.267241	0.00891785	0.138261	10480	0.0860088	FDR 5%	NAM_JL_27	δT
αT		5_196961517	5	196961517	5.35e-06	0.00782491	0.381543	0.258323	0.268987	0.0106639	0.111613	8335	0.0684049	FDR 5%	NAM_JL_27	δT
αT		5_196961647	5	196961647	1.06e-05	0.0143301	0.341598	0.258323	0.268309	0.00998599	0.109567	9017	0.074002	FDR 5%	NAM_JL_27	δT
αT		5_196961705	5	196961705	9.38e-06	0.0128473	0.34573	0.258323	0.268431	0.0101075	0.109948	8896	0.073009	FDR 5%	NAM_JL_27	δT
αT		5_196961815	5	196961815	1.58e-05	0.0203611	0.34573	0.258323	0.267917	0.00959399	0.106255	9492	0.0779003	FDR 5%	NAM_JL_27	δT
αT		5_196962121	5	196962121	3.27e-06	0.00514216	0.347107	0.258323	0.269476	0.0111526	0.115631	7759	0.0636777	FDR 5%	NAM_JL_27	δT
αT		5_196962215	5	196962215	6.62e-06	0.00945454	0.350551	0.258323	0.268777	0.0104534	0.111253	8528	0.0699888	FDR 5%	NAM_JL_27	δT
αT		5_196962245	5	196962245	1.77e-05	0.022343	0.349862	0.258323	0.267801	0.00947768	0.105892	9673	0.0793858	FDR 5%	NAM_JL_27	δT
αT		5_196962256	5	196962256	6.46e-06	0.00926321	0.342975	0.258323	0.2688	0.0104769	0.111859	8500	0.069759	FDR 5%	NAM_JL_27	δT
αT		5_196962297	5	196962297	9.02e-06	0.012394	0.35124	0.258323	0.26847	0.0101468	0.109433	8863	0.0727381	FDR 5%	NAM_JL_27	δT
αT		5_196962598	5	196962598	1.28e-05	0.0169087	0.348485	0.258323	0.268124	0.00980033	0.107503	9220	0.075668	FDR 5%	NAM_JL_27	δT
αT		5_196962604	5	196962604	4.77e-06	0.00713311	0.342975	0.258323	0.269102	0.0107792	0.113446	8141	0.0668127	FDR 5%	NAM_JL_27	δT
αT		5_196962613	5	196962613	3.86e-06	0.00595096	0.343664	0.258323	0.269312	0.0109889	0.114075	7903	0.0648595	FDR 5%	NAM_JL_27	δT
αT		5_196962637	5	196962637	2.07e-06	0.00342077	0.345041	0.258323	0.269931	0.0116083	0.117526	7383	0.0605919	FDR 5%	NAM_JL_27	δT
αT		5_196962685	5	196962685	2.35e-06	0.0038391	0.344353	0.258323	0.269807	0.0114837	0.116917	7454	0.0611746	FDR 5%	NAM_JL_27	δT
αT		5_196962712	5	196962712	9.54e-06	0.0130477	0.34022	0.258323	0.268414	0.010091	0.109482	8907	0.0730992	FDR 5%	NAM_JL_27	δT
αT		5_196964129	5	196964129	7.69e-06	0.0107823	0.34573	0.258323	0.268628	0.0103047	0.110371	8687	0.0712937	FDR 5%	NAM_JL_27	δT
αT		5_196994000	5	196994000	2.53e-07	0.000479751	0.330579	0.258323	0.272037	0.0137139	0.127627	6438	0.0528363	FDR 5%	NAM_JL_27	δT
αT		5_196994071	5	196994071	2.83e-05	0.0334136	0.133609	0.258323	0.267339	0.00901586	0.16325	10335	0.0848188	FDR 5%	NAM_JL_27	δT
αT		5_196994167	5	196994167	3.35e-05	0.0385542	0.128788	0.258323	0.267175	0.00885189	0.168263	10581	0.0868377	FDR 5%	NAM_JL_27	δT
αT		5_196994406	5	196994406	2.83e-05	0.0334138	0.149449	0.258323	0.267339	0.00901576	0.148055	10336	0.084827	FDR 5%	NAM_JL_27	δT
αT		5_196994517	5	196994517	3.35e-05	0.0385542	0.128788	0.258323	0.267175	0.00885189	0.168263	10582	0.0868459	FDR 5%	NAM_JL_27	δT
αT		5_196994946	5	196994946	1.68e-05	0.0213622	0.152204	0.258323	0.267853	0.00952946	0.149299	9600	0.0787867	FDR 5%	NAM_JL_27	δT
αT		5_196995347	5	196995347	3.31e-05	0.0382334	0.129477	0.258323	0.267186	0.00886283	0.167648	10553	0.0866079	FDR 5%	NAM_JL_27	δT
αT		5_196996239	5	196996239	1.37e-07	0.000269746	0.316804	0.258323	0.272658	0.0143347	0.132383	6182	0.0507353	FDR 5%	NAM_JL_27	δT
αT		5_197000036	5	197000036	1.57e-06	0.00263552	0.263774	0.258323	0.270211	0.0118877	0.130387	7243	0.0594429	FDR 5%	NAM_JL_27	δT
αT		5_197000126	5	197000126	1.49e-06	0.00251238	0.294077	0.258323	0.270264	0.0119409	0.121789	7204	0.0591228	FDR 5%	NAM_JL_27	δT
αT		5_197000184	5	197000184	6.45e-10	2.1e-06	0.31405	0.258323	0.278105	0.0197821	0.159291	3736	0.0306611	FDR 5%	NAM_JL_27	δT
αT		5_197001921	5	197001921	1.82e-05	0.0228749	0.258953	0.258323	0.267774	0.0094509	0.119878	9708	0.079673	FDR 5%	NAM_JL_27	δT
αT		5_197002070	5	197002070	4.05e-05	0.0453408	0.241047	0.258323	0.266988	0.00866487	0.112709	10885	0.0893326	FDR 5%	NAM_JL_27	δT
αT		5_197007202	5	197007202	1.32e-05	0.0173322	0.137741	0.258323	0.268095	0.00977183	0.164843	9257	0.0759717	FDR 5%	NAM_JL_27	δT
αT		5_197045518	5	197045518	2.06e-05	0.0254424	0.144628	0.258323	0.267653	0.00932976	-0.141632	9869	0.0809943	FDR 5%	NAM_JL_27	δT
αT		5_197049669	5	197049669	1.26e-05	0.0166969	0.13292	0.258323	0.268137	0.00981418	0.170589	9207	0.0755613	FDR 5%	NAM_JL_27	δT
αT		5_197227619	5	197227619	5.55e-09	1.41e-05	0.0475207	0.258323	0.275907	0.0175843	-0.323788	4778	0.0392128	FDR 5%	NAM_JL_27	δT
αT		5_197228113	5	197228113	1.89e-09	5.63e-06	0.0447658	0.258323	0.277007	0.0186836	-0.348735	4082	0.0335007	FDR 5%	NAM_JL_27	δT
αT		5_197229210	5	197229210	1.49e-06	0.00252325	0.126033	0.258323	0.27026	0.0119363	-0.179888	7206	0.0591392	FDR 5%	NAM_JL_27	δT
αT		5_197241299	5	197241299	5.98e-11	2.32e-07	0.0833333	0.258323	0.280549	0.0222259	-0.330367	3136	0.025737	FDR 5%	NAM_JL_27	δT
αT		5_197247356	5	197247356	6.2e-10	2.03e-06	0.0812672	0.258323	0.278146	0.0198226	-0.312148	3726	0.0305791	FDR 5%	NAM_JL_27	δT
αT		5_197251891	5	197251891	1.16e-05	0.0154998	0.126722	0.258323	0.268219	0.00989541	-0.159231	9133	0.074954	FDR 5%	NAM_JL_27	δT
αT		5_197256796	5	197256796	4.19e-05	0.0466148	0.0998623	0.258323	0.266956	0.00863277	-0.173143	10938	0.0897675	FDR 5%	NAM_JL_27	δT
αT		5_197271066	5	197271066	2.73e-05	0.0323347	0.247934	0.258323	0.267377	0.0090538	0.109242	10275	0.0843263	FDR 5%	NAM_JL_27	δT
αT		5_197271081	5	197271081	2.43e-05	0.029258	0.248623	0.258323	0.267491	0.00916741	0.11027	10119	0.0830461	FDR 5%	NAM_JL_27	δT
αT		5_197271164	5	197271164	2.73e-05	0.0323347	0.247934	0.258323	0.267377	0.0090538	0.109242	10276	0.0843345	FDR 5%	NAM_JL_27	δT
αT		5_197271667	5	197271667	3.66e-05	0.0415921	0.496556	0.258323	0.267088	0.00876462	-0.0986109	10720	0.0879784	FDR 5%	NAM_JL_27	δT
αT		5_197276907	5	197276907	1.55e-05	0.0200574	0.491047	0.258323	0.267935	0.00961153	-0.104134	9409	0.0772191	FDR 5%	NAM_JL_27	δT
αT		5_197359759	5	197359759	4.23e-05	0.0470822	0.184573	0.258323	0.266944	0.00862131	-0.125747	10958	0.0899317	FDR 5%	NAM_JL_27	δT
αT		5_197359771	5	197359771	7.28e-10	2.36e-06	0.0736915	0.258323	0.277981	0.0196579	-0.315092	3759	0.0308499	FDR 5%	NAM_JL_27	δT
αT		5_197359840	5	197359840	2.3e-09	6.58e-06	0.121901	0.258323	0.276806	0.0184826	-0.232439	4256	0.0349287	FDR 5%	NAM_JL_27	δT
αT		5_197360010	5	197360010	3.71e-05	0.0420516	0.181818	0.258323	0.267075	0.00875198	-0.127214	10739	0.0881344	FDR 5%	NAM_JL_27	δT
αT		5_197360602	5	197360602	3.39e-05	0.0389817	0.183196	0.258323	0.267162	0.00883863	-0.12792	10607	0.087051	FDR 5%	NAM_JL_27	δT
αT		5_197360641	5	197360641	3.39e-05	0.0389817	0.183196	0.258323	0.267162	0.00883863	-0.12792	10608	0.0870593	FDR 5%	NAM_JL_27	δT
αT		5_197360939	5	197360939	2.07e-05	0.0255032	0.182507	0.258323	0.26765	0.00932711	-0.130713	9872	0.0810189	FDR 5%	NAM_JL_27	δT
αT		5_197361503	5	197361503	2.08e-05	0.02564	0.192837	0.258323	0.267644	0.00932074	-0.130159	9883	0.0811092	FDR 5%	NAM_JL_27	δT
αT		5_197370918	5	197370918	1.61e-05	0.0205607	0.19146	0.258323	0.267897	0.00957393	-0.131584	9530	0.0782122	FDR 5%	NAM_JL_27	δT
αT		5_197370933	5	197370933	1.61e-05	0.0205607	0.19146	0.258323	0.267897	0.00957393	-0.131584	9531	0.0782204	FDR 5%	NAM_JL_27	δT
αT		5_197371036	5	197371036	1.61e-05	0.0205607	0.19146	0.258323	0.267897	0.00957393	-0.131584	9532	0.0782286	FDR 5%	NAM_JL_27	δT
αT		5_197371038	5	197371038	1.61e-05	0.0205607	0.19146	0.258323	0.267897	0.00957393	-0.131584	9533	0.0782368	FDR 5%	NAM_JL_27	δT
αT		5_197371325	5	197371325	1.61e-05	0.0205607	0.19146	0.258323	0.267897	0.00957393	-0.131584	9534	0.078245	FDR 5%	NAM_JL_27	δT
αT		5_197371377	5	197371377	1.61e-05	0.0205607	0.19146	0.258323	0.267897	0.00957393	-0.131584	9535	0.0782532	FDR 5%	NAM_JL_27	δT
αT		5_197431827	5	197431827	6.96e-06	0.00988514	0.186639	0.258323	0.268726	0.0104028	-0.135972	8583	0.0704402	FDR 5%	NAM_JL_27	δT
αT		5_197517119	5	197517119	1.16e-05	0.0155027	0.224518	0.258323	0.268218	0.0098948	-0.122122	9140	0.0750115	FDR 5%	NAM_JL_27	δT
αT		5_197517647	5	197517647	4.06e-05	0.0454343	0.206612	0.258323	0.266985	0.0086623	-0.117	10891	0.0893818	FDR 5%	NAM_JL_27	δT
αT		5_197519300	5	197519300	4.5e-05	0.049515	0.209366	0.258323	0.266884	0.00856127	-0.115992	11077	0.0909083	FDR 5%	NAM_JL_27	δT
αT		5_197519400	5	197519400	2.4e-05	0.0290002	0.2073	0.258323	0.267501	0.00917818	-0.120647	10094	0.0828409	FDR 5%	NAM_JL_27	δT
αT		5_197519401	5	197519401	9.73e-06	0.0132638	0.194904	0.258323	0.268394	0.0100711	-0.130931	8940	0.0733701	FDR 5%	NAM_JL_27	δT
αT		5_197519402	5	197519402	2.4e-05	0.0290002	0.2073	0.258323	0.267501	0.00917818	-0.120647	10095	0.0828491	FDR 5%	NAM_JL_27	δT
αT		5_197519787	5	197519787	4.85e-06	0.00724302	0.201102	0.258323	0.269086	0.0107627	-0.131574	8152	0.066903	FDR 5%	NAM_JL_27	δT
αT		5_197519986	5	197519986	2.75e-05	0.0325363	0.210744	0.258323	0.267369	0.00904629	-0.119686	10292	0.0844659	FDR 5%	NAM_JL_27	δT
αT		5_197519997	5	197519997	2.75e-05	0.0325363	0.210744	0.258323	0.267369	0.00904629	-0.119686	10293	0.0844741	FDR 5%	NAM_JL_27	δT
αT		5_197520770	5	197520770	2.34e-05	0.0283344	0.210055	0.258323	0.267529	0.00920565	-0.121151	10051	0.082488	FDR 5%	NAM_JL_27	δT
αT		5_197521049	5	197521049	1.73e-05	0.0218556	0.209366	0.258323	0.267826	0.00950293	-0.123194	9638	0.0790985	FDR 5%	NAM_JL_27	δT
αT		5_197521649	5	197521649	1.63e-05	0.0208281	0.207989	0.258323	0.267882	0.00955931	-0.123672	9553	0.0784009	FDR 5%	NAM_JL_27	δT
αT		5_197521843	5	197521843	1.57e-05	0.020308	0.204545	0.258323	0.26792	0.00959718	-0.126454	9429	0.0773833	FDR 5%	NAM_JL_27	δT
αT		5_197524021	5	197524021	7.77e-07	0.00137212	0.163912	0.258323	0.270912	0.0125888	-0.160138	6903	0.0566525	FDR 5%	NAM_JL_27	δT
αT		5_197524116	5	197524116	7.83e-07	0.0013818	0.164601	0.258323	0.270904	0.0125813	-0.159849	6905	0.0566689	FDR 5%	NAM_JL_27	δT
αT		5_197524312	5	197524312	7.83e-07	0.0013818	0.164601	0.258323	0.270904	0.0125813	-0.159849	6906	0.0566771	FDR 5%	NAM_JL_27	δT
αT		5_197524562	5	197524562	8.08e-08	0.000165087	0.162534	0.258323	0.27319	0.0148667	-0.175763	5963	0.048938	FDR 5%	NAM_JL_27	δT
αT		5_197524565	5	197524565	6.56e-08	0.000135782	0.159091	0.258323	0.2734	0.0150766	-0.179334	5890	0.0483389	FDR 5%	NAM_JL_27	δT
αT		5_197524865	5	197524865	2.25e-05	0.0274802	0.0860882	0.258323	0.267565	0.009242	0.186785	9988	0.0819709	FDR 5%	NAM_JL_27	δT
αT		5_197524946	5	197524946	2.58e-06	0.00417447	0.214187	0.258323	0.269711	0.0113881	-0.135973	7545	0.0619214	FDR 5%	NAM_JL_27	δT
αT		5_197532824	5	197532824	2.84e-07	0.000534584	0.201102	0.258323	0.271922	0.0135991	-0.15189	6476	0.0531482	FDR 5%	NAM_JL_27	δT
αT		5_197533168	5	197533168	1.33e-07	0.000262363	0.197658	0.258323	0.272687	0.0143638	-0.157192	6175	0.0506779	FDR 5%	NAM_JL_27	δT
αT		5_197533813	5	197533813	2.41e-05	0.0290924	0.389118	0.258323	0.267497	0.00917416	-0.0976073	10107	0.0829476	FDR 5%	NAM_JL_27	δT
αT		5_197534183	5	197534183	2.11e-10	7.58e-07	0.203857	0.258323	0.279253	0.02093	-0.179512	3385	0.0277805	FDR 5%	NAM_JL_27	δT
αT		5_197534241	5	197534241	1.18e-07	0.00023403	0.182507	0.258323	0.27281	0.0144871	-0.161805	6126	0.0502757	FDR 5%	NAM_JL_27	δT
αT		5_197534267	5	197534267	4.01e-09	1.08e-05	0.178375	0.258323	0.276238	0.0179146	-0.182601	4531	0.0371857	FDR 5%	NAM_JL_27	δT
αT		5_197536607	5	197536607	8.83e-08	0.000179375	0.172176	0.258323	0.2731	0.0147764	-0.168553	6001	0.0492499	FDR 5%	NAM_JL_27	δT
αT		5_197538143	5	197538143	9.64e-06	0.0131566	0.280992	0.258323	0.268404	0.0100808	-0.115255	8925	0.073247	FDR 5%	NAM_JL_27	δT
αT		5_197538921	5	197538921	3.02e-05	0.0352236	0.300964	0.258323	0.267278	0.00895486	-0.105201	10431	0.0856066	FDR 5%	NAM_JL_27	δT
αT		5_197540901	5	197540901	6.22e-06	0.00894556	0.065427	0.258323	0.268838	0.0105145	0.250762	8472	0.0695292	FDR 5%	NAM_JL_27	δT
αT		5_197541304	5	197541304	5.33e-06	0.00779394	0.0668044	0.258323	0.268991	0.0106683	0.240009	8331	0.068372	FDR 5%	NAM_JL_27	δT
αT		5_197541345	5	197541345	4.47e-06	0.0067476	0.0661157	0.258323	0.269165	0.0108419	0.252345	8080	0.0663121	FDR 5%	NAM_JL_27	δT
αT		5_197541409	5	197541409	4.27e-05	0.0473714	0.0695592	0.258323	0.266937	0.00861387	0.219145	10974	0.090063	FDR 5%	NAM_JL_27	δT
αT		5_197586316	5	197586316	3.55e-08	7.67e-05	0.09573	0.258323	0.274022	0.0156991	-0.24208	5634	0.0462379	FDR 5%	NAM_JL_27	δT
αT		5_197587113	5	197587113	1.4e-06	0.00237612	0.172865	0.258323	0.270324	0.012001	-0.157203	7173	0.0588684	FDR 5%	NAM_JL_27	δT
αT		5_197587137	5	197587137	8.11e-08	0.000165593	0.257576	0.258323	0.273186	0.0148631	-0.146722	5966	0.0489626	FDR 5%	NAM_JL_27	δT
αT		5_197587142	5	197587142	3.49e-07	0.000648376	0.162534	0.258323	0.271715	0.0133915	-0.17001	6564	0.0538704	FDR 5%	NAM_JL_27	δT
αT		5_197587148	5	197587148	3.5e-08	7.58e-05	0.256198	0.258323	0.274035	0.0157123	-0.151591	5629	0.0461969	FDR 5%	NAM_JL_27	δT
αT		5_197587436	5	197587436	3.76e-07	0.000695332	0.161846	0.258323	0.271641	0.013318	-0.169782	6585	0.0540427	FDR 5%	NAM_JL_27	δT
αT		5_197587501	5	197587501	2.7e-07	0.000509991	0.163223	0.258323	0.271974	0.0136503	-0.17138	6451	0.052943	FDR 5%	NAM_JL_27	δT
αT		5_197587860	5	197587860	2.86e-05	0.0337187	0.0668044	0.258323	0.267329	0.00900577	0.223689	10347	0.0849172	FDR 5%	NAM_JL_27	δT
αT		5_197588888	5	197588888	2.03e-06	0.00335246	0.245868	0.258323	0.269954	0.011631	-0.129774	7364	0.0604359	FDR 5%	NAM_JL_27	δT
αT		5_197589261	5	197589261	2e-08	4.51e-05	0.139118	0.258323	0.274602	0.0162788	-0.202233	5416	0.0444488	FDR 5%	NAM_JL_27	δT
αT		5_197589442	5	197589442	5.72e-06	0.00830329	0.162534	0.258323	0.268921	0.0105979	-0.149863	8394	0.0688891	FDR 5%	NAM_JL_27	δT
αT		5_197589450	5	197589450	7.2e-06	0.0101703	0.163223	0.258323	0.268693	0.0103699	-0.149438	8624	0.0707767	FDR 5%	NAM_JL_27	δT
αT		5_197589491	5	197589491	1.16e-08	2.72e-05	0.137741	0.258323	0.275154	0.0168308	-0.209341	5211	0.0427664	FDR 5%	NAM_JL_27	δT
αT		5_197589595	5	197589595	5.63e-07	0.00101406	0.15978	0.258323	0.271236	0.0129128	-0.170039	6761	0.0554871	FDR 5%	NAM_JL_27	δT
αT		5_197590980	5	197590980	6.37e-08	0.000132094	0.140496	0.258323	0.27343	0.0151065	-0.19163	5877	0.0482322	FDR 5%	NAM_JL_27	δT
αT		5_197590999	5	197590999	6.37e-08	0.000132094	0.140496	0.258323	0.27343	0.0151065	-0.19163	5878	0.0482404	FDR 5%	NAM_JL_27	δT
αT		5_197591005	5	197591005	7.8e-08	0.000159746	0.141185	0.258323	0.273225	0.0149017	-0.189469	5952	0.0488477	FDR 5%	NAM_JL_27	δT
αT		5_197591131	5	197591131	3.43e-05	0.0393259	0.360193	0.258323	0.267151	0.00882787	-0.1012	10631	0.087248	FDR 5%	NAM_JL_27	δT
αT		5_197609615	5	197609615	4.75e-09	1.23e-05	0.128788	0.258323	0.276064	0.0177411	-0.229517	4711	0.0386629	FDR 5%	NAM_JL_27	δT
αT		5_197609666	5	197609666	3.05e-10	1.08e-06	0.124656	0.258323	0.278874	0.0205507	-0.254076	3453	0.0283386	FDR 5%	NAM_JL_27	δT
αT		5_197609721	5	197609721	1.33e-10	4.92e-07	0.139118	0.258323	0.279722	0.0213989	-0.230553	3304	0.0271157	FDR 5%	NAM_JL_27	δT
αT		5_197609852	5	197609852	1.89e-09	5.63e-06	0.130165	0.258323	0.277007	0.0186835	-0.231091	4083	0.0335089	FDR 5%	NAM_JL_27	δT
αT		5_197609853	5	197609853	7.86e-10	2.53e-06	0.128788	0.258323	0.277903	0.0195797	-0.240727	3787	0.0310797	FDR 5%	NAM_JL_27	δT
αT		5_197610657	5	197610657	1.3e-05	0.0171475	0.208678	0.258323	0.268108	0.00978494	0.134029	9234	0.0757829	FDR 5%	NAM_JL_27	δT
αT		5_197610805	5	197610805	2.74e-09	7.64e-06	0.134986	0.258323	0.276627	0.0183042	-0.225544	4363	0.0358069	FDR 5%	NAM_JL_27	δT
αT		5_197611771	5	197611771	4.46e-09	1.16e-05	0.132231	0.258323	0.27613	0.0178065	-0.226034	4686	0.0384577	FDR 5%	NAM_JL_27	δT
αT		5_197612138	5	197612138	5.03e-08	0.00010615	0.132231	0.258323	0.273668	0.0153448	-0.208628	5778	0.0474197	FDR 5%	NAM_JL_27	δT
αT		5_197612182	5	197612182	5.03e-08	0.00010615	0.132231	0.258323	0.273668	0.0153448	-0.208628	5779	0.0474279	FDR 5%	NAM_JL_27	δT
αT		5_197612210	5	197612210	2.13e-07	0.000409065	0.117769	0.258323	0.272211	0.0138873	-0.217174	6355	0.0521551	FDR 5%	NAM_JL_27	δT
αT		5_197612212	5	197612212	2.63e-08	5.79e-05	0.131543	0.258323	0.274327	0.0160035	-0.213678	5527	0.0453598	FDR 5%	NAM_JL_27	δT
αT		5_197612434	5	197612434	2.63e-08	5.79e-05	0.131543	0.258323	0.274327	0.0160035	-0.213678	5528	0.045368	FDR 5%	NAM_JL_27	δT
αT		5_197640558	5	197640558	1.15e-06	0.00197776	0.106749	0.258323	0.270521	0.0121978	-0.212658	7078	0.0580887	FDR 5%	NAM_JL_27	δT
αT		5_197649858	5	197649858	1.68e-05	0.0213631	0.118457	0.258323	0.267852	0.00952932	-0.174194	9601	0.0787949	FDR 5%	NAM_JL_27	δT
αT		5_197724414	5	197724414	2.8e-05	0.0330721	0.110193	0.258323	0.267351	0.00902826	-0.173794	10311	0.0846218	FDR 5%	NAM_JL_27	δT
αT		5_197731528	5	197731528	4.2e-05	0.0467123	0.387741	0.258323	0.266953	0.00863021	-0.0971546	10945	0.089825	FDR 5%	NAM_JL_27	δT
αT		5_197732940	5	197732940	8.01e-06	0.0111818	0.403581	0.258323	0.268587	0.010264	-0.105047	8727	0.071622	FDR 5%	NAM_JL_27	δT
αT		5_197732967	5	197732967	8.01e-06	0.0111818	0.403581	0.258323	0.268587	0.010264	-0.105047	8728	0.0716302	FDR 5%	NAM_JL_27	δT
αT		5_197733127	5	197733127	7.48e-06	0.0105332	0.402893	0.258323	0.268655	0.0103315	-0.105386	8655	0.0710311	FDR 5%	NAM_JL_27	δT
αT		5_197733783	5	197733783	1.27e-05	0.0167902	0.402204	0.258323	0.268131	0.00980824	-0.102789	9211	0.0755942	FDR 5%	NAM_JL_27	δT
αT		5_197733996	5	197733996	1.03e-05	0.0139622	0.400826	0.258323	0.268339	0.0100154	-0.103981	8983	0.073723	FDR 5%	NAM_JL_27	δT
αT		5_197734212	5	197734212	1.03e-05	0.0139622	0.400826	0.258323	0.268339	0.0100154	-0.103981	8984	0.0737312	FDR 5%	NAM_JL_27	δT
αT		5_197778743	5	197778743	1.29e-05	0.0169997	0.100551	0.258323	0.268118	0.00979447	-0.19331	9224	0.0757008	FDR 5%	NAM_JL_27	δT
αT		5_197785871	5	197785871	7.32e-06	0.0103201	0.0998623	0.258323	0.268676	0.0103532	-0.199791	8643	0.0709326	FDR 5%	NAM_JL_27	δT
αT		5_197786600	5	197786600	1.29e-05	0.0169997	0.100551	0.258323	0.268118	0.00979447	-0.19331	9225	0.075709	FDR 5%	NAM_JL_27	δT
αT		5_197790117	5	197790117	3.7e-08	7.98e-05	0.0984848	0.258323	0.27398	0.0156568	-0.245312	5649	0.046361	FDR 5%	NAM_JL_27	δT
αT		5_197791480	5	197791480	1.42e-08	3.27e-05	0.0867769	0.258323	0.274949	0.0166256	-0.276138	5295	0.0434558	FDR 5%	NAM_JL_27	δT
αT		5_197791969	5	197791969	9.18e-09	2.19e-05	0.0929752	0.258323	0.275395	0.0170716	-0.265068	5094	0.0418062	FDR 5%	NAM_JL_27	δT
αT		5_197791973	5	197791973	9.58e-09	2.28e-05	0.0929752	0.258323	0.275351	0.0170278	-0.269183	5111	0.0419457	FDR 5%	NAM_JL_27	δT
αT		5_197813237	5	197813237	6.29e-10	2.05e-06	0.0915978	0.258323	0.27813	0.0198073	-0.294252	3731	0.0306201	FDR 5%	NAM_JL_27	δT
αT		5_197813543	5	197813543	2.76e-09	7.71e-06	0.115702	0.258323	0.276618	0.0182947	-0.235586	4364	0.0358151	FDR 5%	NAM_JL_27	δT
αT		5_197813545	5	197813545	2.76e-09	7.71e-06	0.115702	0.258323	0.276618	0.0182947	-0.235586	4365	0.0358233	FDR 5%	NAM_JL_27	δT
αT		5_197813825	5	197813825	2.53e-10	9.05e-07	0.0909091	0.258323	0.279064	0.0207408	-0.302932	3409	0.0279775	FDR 5%	NAM_JL_27	δT
αT		5_197813827	5	197813827	2.53e-10	9.05e-07	0.0909091	0.258323	0.279064	0.0207408	-0.302932	3410	0.0279857	FDR 5%	NAM_JL_27	δT
αT		5_197814031	5	197814031	1.05e-05	0.0141851	0.152893	0.258323	0.268321	0.00999751	-0.154478	9004	0.0738953	FDR 5%	NAM_JL_27	δT
αT		5_197817676	5	197817676	1.88e-10	6.79e-07	0.0977961	0.258323	0.279371	0.0210478	-0.288965	3365	0.0276164	FDR 5%	NAM_JL_27	δT
αT		5_197819133	5	197819133	1.88e-10	6.79e-07	0.0977961	0.258323	0.279371	0.0210478	-0.288965	3366	0.0276246	FDR 5%	NAM_JL_27	δT
αT		5_197819279	5	197819279	1.16e-10	4.33e-07	0.0977961	0.258323	0.279864	0.0215408	-0.291375	3274	0.0268695	FDR 5%	NAM_JL_27	δT
αT		5_197819376	5	197819376	1.88e-10	6.79e-07	0.0977961	0.258323	0.279371	0.0210478	-0.288965	3367	0.0276328	FDR 5%	NAM_JL_27	δT
αT		5_197819389	5	197819389	1.88e-10	6.79e-07	0.0977961	0.258323	0.279371	0.0210478	-0.288965	3368	0.027641	FDR 5%	NAM_JL_27	δT
αT		5_197829338	5	197829338	2.68e-07	0.000506126	0.0695592	0.258323	0.271981	0.0136583	-0.233711	6449	0.0529266	FDR 5%	NAM_JL_27	δT
αT		5_197831792	5	197831792	4.83e-10	1.6e-06	0.0971074	0.258323	0.278401	0.0200775	-0.278352	3677	0.0301769	FDR 5%	NAM_JL_27	δT
αT		5_197834254	5	197834254	1.73e-08	3.91e-05	0.108815	0.258323	0.274753	0.01643	-0.226998	5371	0.0440795	FDR 5%	NAM_JL_27	δT
αT		5_197834533	5	197834533	1.36e-10	5.01e-07	0.0984848	0.258323	0.279701	0.021378	-0.288744	3307	0.0271404	FDR 5%	NAM_JL_27	δT
αT		5_197834550	5	197834550	1.36e-10	5.01e-07	0.0984848	0.258323	0.279701	0.021378	-0.288744	3308	0.0271486	FDR 5%	NAM_JL_27	δT
αT		5_197834827	5	197834827	1.36e-10	5.01e-07	0.0984848	0.258323	0.279701	0.021378	-0.288744	3309	0.0271568	FDR 5%	NAM_JL_27	δT
αT		5_197836183	5	197836183	1.36e-10	5.01e-07	0.0984848	0.258323	0.279701	0.021378	-0.288744	3310	0.027165	FDR 5%	NAM_JL_27	δT
αT		5_197858949	5	197858949	3.9e-10	1.35e-06	0.0998623	0.258323	0.27862	0.0202971	-0.278098	3526	0.0289377	FDR 5%	NAM_JL_27	δT
αT		5_197859351	5	197859351	1.17e-09	3.67e-06	0.102617	0.258323	0.277494	0.0191709	-0.265192	3893	0.0319496	FDR 5%	NAM_JL_27	δT
αT		5_197859590	5	197859590	1.4e-10	5.14e-07	0.102617	0.258323	0.279674	0.0213507	-0.27385	3316	0.0272142	FDR 5%	NAM_JL_27	δT
αT		5_197859610	5	197859610	1.4e-10	5.14e-07	0.102617	0.258323	0.279674	0.0213507	-0.27385	3317	0.0272224	FDR 5%	NAM_JL_27	δT
αT		5_197859746	5	197859746	6.55e-10	2.13e-06	0.103306	0.258323	0.27809	0.0197669	-0.260676	3738	0.0306776	FDR 5%	NAM_JL_27	δT
αT		5_197859959	5	197859959	1.33e-10	4.92e-07	0.103306	0.258323	0.279723	0.0214001	-0.273337	3300	0.0270829	FDR 5%	NAM_JL_27	δT
αT		5_197860119	5	197860119	1.33e-10	4.92e-07	0.103306	0.258323	0.279723	0.0214001	-0.273337	3301	0.0270911	FDR 5%	NAM_JL_27	δT
αT		5_197860153	5	197860153	1.33e-10	4.92e-07	0.103306	0.258323	0.279723	0.0214001	-0.273337	3302	0.0270993	FDR 5%	NAM_JL_27	δT
αT		5_197860160	5	197860160	1.33e-10	4.92e-07	0.103306	0.258323	0.279723	0.0214001	-0.273337	3303	0.0271075	FDR 5%	NAM_JL_27	δT
αT		5_197860219	5	197860219	1.16e-10	4.32e-07	0.102617	0.258323	0.279867	0.0215441	-0.275398	3272	0.0268531	FDR 5%	NAM_JL_27	δT
αT		5_197860383	5	197860383	1.53e-09	4.68e-06	0.104683	0.258323	0.277219	0.0188953	-0.25293	3992	0.0327621	FDR 5%	NAM_JL_27	δT
αT		5_197861606	5	197861606	5.58e-09	1.42e-05	0.10124	0.258323	0.275901	0.0175777	-0.253182	4789	0.039303	FDR 5%	NAM_JL_27	δT
αT		5_197862615	5	197862615	2.03e-10	7.3e-07	0.0977961	0.258323	0.279293	0.0209703	-0.282655	3379	0.0277313	FDR 5%	NAM_JL_27	δT
αT		5_197862636	5	197862636	7.42e-11	2.84e-07	0.0991736	0.258323	0.280326	0.0220031	-0.286148	3182	0.0261145	FDR 5%	NAM_JL_27	δT
αT		5_197862671	5	197862671	2.03e-10	7.3e-07	0.0977961	0.258323	0.279293	0.0209703	-0.282655	3380	0.0277395	FDR 5%	NAM_JL_27	δT
αT		5_197862673	5	197862673	2.03e-10	7.3e-07	0.0977961	0.258323	0.279293	0.0209703	-0.282655	3381	0.0277477	FDR 5%	NAM_JL_27	δT
αT		5_197863740	5	197863740	1.38e-07	0.000272149	0.0943526	0.258323	0.272648	0.0143245	-0.220626	6190	0.050801	FDR 5%	NAM_JL_27	δT
αT		5_197863782	5	197863782	3.32e-10	1.16e-06	0.10124	0.258323	0.278787	0.0204635	-0.276881	3466	0.0284453	FDR 5%	NAM_JL_27	δT
αT		5_197864122	5	197864122	2.99e-10	1.06e-06	0.0998623	0.258323	0.278893	0.0205703	-0.279801	3449	0.0283057	FDR 5%	NAM_JL_27	δT
αT		5_197864792	5	197864792	3.32e-10	1.16e-06	0.10124	0.258323	0.278787	0.0204635	-0.276881	3467	0.0284535	FDR 5%	NAM_JL_27	δT
αT		5_197864875	5	197864875	3.32e-10	1.16e-06	0.10124	0.258323	0.278787	0.0204635	-0.276881	3468	0.0284617	FDR 5%	NAM_JL_27	δT
αT		5_197865166	5	197865166	3.32e-10	1.16e-06	0.10124	0.258323	0.278787	0.0204635	-0.276881	3469	0.0284699	FDR 5%	NAM_JL_27	δT
αT		5_197865311	5	197865311	3.32e-10	1.16e-06	0.10124	0.258323	0.278787	0.0204635	-0.276881	3470	0.0284781	FDR 5%	NAM_JL_27	δT
αT		5_197865612	5	197865612	3.55e-10	1.23e-06	0.0971074	0.258323	0.278717	0.0203937	-0.283261	3508	0.02879	FDR 5%	NAM_JL_27	δT
αT		5_197865877	5	197865877	3.32e-10	1.16e-06	0.10124	0.258323	0.278787	0.0204635	-0.276881	3471	0.0284863	FDR 5%	NAM_JL_27	δT
αT		5_197865921	5	197865921	3.32e-10	1.16e-06	0.10124	0.258323	0.278787	0.0204635	-0.276881	3472	0.0284945	FDR 5%	NAM_JL_27	δT
αT		5_197866091	5	197866091	3.32e-10	1.16e-06	0.10124	0.258323	0.278787	0.0204635	-0.276881	3473	0.0285027	FDR 5%	NAM_JL_27	δT
αT		5_197866232	5	197866232	3.33e-10	1.16e-06	0.102617	0.258323	0.278783	0.0204599	-0.273521	3484	0.028593	FDR 5%	NAM_JL_27	δT
αT		5_197866420	5	197866420	3.46e-10	1.2e-06	0.101928	0.258323	0.278745	0.0204219	-0.27421	3503	0.0287489	FDR 5%	NAM_JL_27	δT
αT		5_197866481	5	197866481	3.32e-10	1.16e-06	0.10124	0.258323	0.278787	0.0204635	-0.276881	3474	0.0285109	FDR 5%	NAM_JL_27	δT
αT		5_197866834	5	197866834	2.13e-09	6.19e-06	0.0860882	0.258323	0.276886	0.0185623	-0.279049	4184	0.0343378	FDR 5%	NAM_JL_27	δT
αT		5_197867050	5	197867050	7.01e-09	1.72e-05	0.084022	0.258323	0.275669	0.0173461	-0.268396	4957	0.0406818	FDR 5%	NAM_JL_27	δT
αT		5_197867636	5	197867636	3.32e-10	1.16e-06	0.10124	0.258323	0.278787	0.0204635	-0.276881	3475	0.0285191	FDR 5%	NAM_JL_27	δT
αT		5_197868038	5	197868038	1.53e-09	4.67e-06	0.0874656	0.258323	0.277224	0.0189012	-0.277714	3984	0.0326965	FDR 5%	NAM_JL_27	δT
αT		5_197868773	5	197868773	3.32e-10	1.16e-06	0.10124	0.258323	0.278787	0.0204635	-0.276881	3476	0.0285273	FDR 5%	NAM_JL_27	δT
αT		5_197869541	5	197869541	3.32e-10	1.16e-06	0.10124	0.258323	0.278787	0.0204635	-0.276881	3477	0.0285355	FDR 5%	NAM_JL_27	δT
αT		5_197869890	5	197869890	3.32e-10	1.16e-06	0.10124	0.258323	0.278787	0.0204635	-0.276881	3478	0.0285437	FDR 5%	NAM_JL_27	δT
αT		5_197870488	5	197870488	3.32e-10	1.16e-06	0.10124	0.258323	0.278787	0.0204635	-0.276881	3479	0.028552	FDR 5%	NAM_JL_27	δT
αT		5_197870772	5	197870772	3.32e-10	1.16e-06	0.10124	0.258323	0.278787	0.0204635	-0.276881	3480	0.0285602	FDR 5%	NAM_JL_27	δT
αT		5_197871565	5	197871565	1.38e-08	3.18e-05	0.0909091	0.258323	0.27498	0.0166565	-0.233356	5286	0.0433819	FDR 5%	NAM_JL_27	δT
αT		5_197872406	5	197872406	3.32e-10	1.16e-06	0.10124	0.258323	0.278787	0.0204635	-0.276881	3481	0.0285684	FDR 5%	NAM_JL_27	δT
αT		5_197873196	5	197873196	2.78e-10	9.89e-07	0.0971074	0.258323	0.278967	0.0206436	-0.282825	3430	0.0281498	FDR 5%	NAM_JL_27	δT
αT		5_197873458	5	197873458	3.32e-10	1.16e-06	0.10124	0.258323	0.278787	0.0204635	-0.276881	3482	0.0285766	FDR 5%	NAM_JL_27	δT
αT		5_197873480	5	197873480	3.43e-10	1.19e-06	0.0922865	0.258323	0.278753	0.0204297	-0.297048	3502	0.0287407	FDR 5%	NAM_JL_27	δT
αT		5_197876885	5	197876885	1.48e-10	5.44e-07	0.104683	0.258323	0.279613	0.0212893	-0.27488	3324	0.0272799	FDR 5%	NAM_JL_27	δT
αT		5_197877171	5	197877171	3.32e-10	1.16e-06	0.10124	0.258323	0.278787	0.0204635	-0.276881	3483	0.0285848	FDR 5%	NAM_JL_27	δT
αT		5_197877810	5	197877810	1.15e-10	4.28e-07	0.0895317	0.258323	0.279877	0.0215534	-0.30325	3271	0.0268449	FDR 5%	NAM_JL_27	δT
αT		5_197878312	5	197878312	4.66e-11	1.84e-07	0.0998623	0.258323	0.280804	0.0224812	-0.288285	3082	0.0252938	FDR 5%	NAM_JL_27	δT
αT		5_197878382	5	197878382	4.66e-11	1.84e-07	0.0998623	0.258323	0.280804	0.0224812	-0.288285	3083	0.025302	FDR 5%	NAM_JL_27	δT
αT		5_197878624	5	197878624	4.46e-11	1.77e-07	0.100551	0.258323	0.28085	0.0225273	-0.287671	3062	0.0251297	FDR 5%	NAM_JL_27	δT
αT		5_197878728	5	197878728	4.46e-11	1.77e-07	0.100551	0.258323	0.28085	0.0225273	-0.287671	3063	0.0251379	FDR 5%	NAM_JL_27	δT
αT		5_197878739	5	197878739	1.01e-10	3.77e-07	0.105372	0.258323	0.280013	0.0216894	-0.27114	3249	0.0266644	FDR 5%	NAM_JL_27	δT
αT		5_197879022	5	197879022	4.46e-11	1.77e-07	0.100551	0.258323	0.28085	0.0225273	-0.287671	3064	0.0251461	FDR 5%	NAM_JL_27	δT
αT		5_197879030	5	197879030	4.46e-11	1.77e-07	0.100551	0.258323	0.28085	0.0225273	-0.287671	3065	0.0251543	FDR 5%	NAM_JL_27	δT
αT		5_197879120	5	197879120	4.1e-11	1.63e-07	0.0915978	0.258323	0.280937	0.0226142	-0.309032	3056	0.0250804	FDR 5%	NAM_JL_27	δT
αT		5_197879187	5	197879187	4.46e-11	1.77e-07	0.100551	0.258323	0.28085	0.0225273	-0.287671	3066	0.0251625	FDR 5%	NAM_JL_27	δT
αT		5_197879192	5	197879192	4.46e-11	1.77e-07	0.100551	0.258323	0.28085	0.0225273	-0.287671	3067	0.0251707	FDR 5%	NAM_JL_27	δT
αT		5_197879198	5	197879198	4.46e-11	1.77e-07	0.100551	0.258323	0.28085	0.0225273	-0.287671	3068	0.0251789	FDR 5%	NAM_JL_27	δT
αT		5_197879308	5	197879308	1.65e-09	4.99e-06	0.0792011	0.258323	0.277145	0.0188215	-0.27344	4028	0.0330576	FDR 5%	NAM_JL_27	δT
αT		5_197879432	5	197879432	4.46e-11	1.77e-07	0.100551	0.258323	0.28085	0.0225273	-0.287671	3069	0.0251871	FDR 5%	NAM_JL_27	δT
αT		5_197879437	5	197879437	4.46e-11	1.77e-07	0.100551	0.258323	0.28085	0.0225273	-0.287671	3070	0.0251953	FDR 5%	NAM_JL_27	δT
αT		5_197879623	5	197879623	9.28e-08	0.000187582	0.115702	0.258323	0.27305	0.014727	-0.207056	6026	0.049455	FDR 5%	NAM_JL_27	δT
αT		5_197879877	5	197879877	4.46e-11	1.77e-07	0.100551	0.258323	0.28085	0.0225273	-0.287671	3071	0.0252035	FDR 5%	NAM_JL_27	δT
αT		5_197880048	5	197880048	4.46e-11	1.77e-07	0.100551	0.258323	0.28085	0.0225273	-0.287671	3072	0.0252117	FDR 5%	NAM_JL_27	δT
αT		5_197880925	5	197880925	1.22e-11	5.09e-08	0.103994	0.258323	0.282186	0.0238624	-0.28373	2930	0.0240463	FDR 5%	NAM_JL_27	δT
αT		5_197880957	5	197880957	1.22e-11	5.09e-08	0.103994	0.258323	0.282186	0.0238624	-0.28373	2931	0.0240545	FDR 5%	NAM_JL_27	δT
αT		5_197881021	5	197881021	9.59e-11	3.6e-07	0.103994	0.258323	0.280062	0.0217392	-0.269977	3244	0.0266233	FDR 5%	NAM_JL_27	δT
αT		5_197881260	5	197881260	8.32e-11	3.16e-07	0.100551	0.258323	0.280208	0.0218853	-0.280111	3211	0.0263525	FDR 5%	NAM_JL_27	δT
αT		5_197881402	5	197881402	4.66e-11	1.84e-07	0.0998623	0.258323	0.280804	0.0224812	-0.288285	3084	0.0253102	FDR 5%	NAM_JL_27	δT
αT		5_197881682	5	197881682	4.46e-11	1.77e-07	0.100551	0.258323	0.28085	0.0225273	-0.287671	3073	0.0252199	FDR 5%	NAM_JL_27	δT
αT		5_197881684	5	197881684	4.46e-11	1.77e-07	0.100551	0.258323	0.28085	0.0225273	-0.287671	3074	0.0252281	FDR 5%	NAM_JL_27	δT
αT		5_197881685	5	197881685	4.46e-11	1.77e-07	0.100551	0.258323	0.28085	0.0225273	-0.287671	3075	0.0252363	FDR 5%	NAM_JL_27	δT
αT		5_197881829	5	197881829	4.46e-11	1.77e-07	0.100551	0.258323	0.28085	0.0225273	-0.287671	3076	0.0252446	FDR 5%	NAM_JL_27	δT
αT		5_197882023	5	197882023	6.77e-11	2.62e-07	0.103306	0.258323	0.280421	0.0220982	-0.278442	3152	0.0258683	FDR 5%	NAM_JL_27	δT
αT		5_197882168	5	197882168	4.46e-11	1.77e-07	0.100551	0.258323	0.28085	0.0225273	-0.287671	3077	0.0252528	FDR 5%	NAM_JL_27	δT
αT		5_197885252	5	197885252	2.77e-10	9.84e-07	0.0847107	0.258323	0.278972	0.020649	-0.290844	3428	0.0281334	FDR 5%	NAM_JL_27	δT
αT		5_197885755	5	197885755	3.15e-10	1.11e-06	0.0909091	0.258323	0.27884	0.0205169	-0.290425	3457	0.0283714	FDR 5%	NAM_JL_27	δT
αT		5_197885776	5	197885776	3.15e-10	1.11e-06	0.0909091	0.258323	0.27884	0.0205169	-0.290425	3458	0.0283796	FDR 5%	NAM_JL_27	δT
αT		5_197885793	5	197885793	3.15e-10	1.11e-06	0.0909091	0.258323	0.27884	0.0205169	-0.290425	3459	0.0283878	FDR 5%	NAM_JL_27	δT
αT		5_197885966	5	197885966	1.8e-10	6.53e-07	0.0943526	0.258323	0.279417	0.0210934	-0.285607	3354	0.0275261	FDR 5%	NAM_JL_27	δT
αT		5_197886339	5	197886339	4.46e-11	1.77e-07	0.100551	0.258323	0.28085	0.0225273	-0.287671	3078	0.025261	FDR 5%	NAM_JL_27	δT
αT		5_197886515	5	197886515	3.41e-06	0.00533222	0.065427	0.258323	0.269436	0.0111123	-0.235391	7791	0.0639403	FDR 5%	NAM_JL_27	δT
αT		5_197889788	5	197889788	1.19e-10	4.43e-07	0.10124	0.258323	0.279838	0.0215147	-0.279323	3277	0.0268942	FDR 5%	NAM_JL_27	δT
αT		5_197902265	5	197902265	1.23e-10	4.56e-07	0.0964187	0.258323	0.279805	0.0214821	-0.282371	3286	0.026968	FDR 5%	NAM_JL_27	δT
αT		5_197902322	5	197902322	4.82e-11	1.9e-07	0.0991736	0.258323	0.28077	0.0224467	-0.286772	3087	0.0253348	FDR 5%	NAM_JL_27	δT
αT		5_197902323	5	197902323	4.82e-11	1.9e-07	0.0991736	0.258323	0.28077	0.0224467	-0.286772	3088	0.025343	FDR 5%	NAM_JL_27	δT
αT		5_197902598	5	197902598	4.82e-11	1.9e-07	0.0991736	0.258323	0.28077	0.0224467	-0.286772	3089	0.0253512	FDR 5%	NAM_JL_27	δT
αT		5_197903051	5	197903051	5.07e-11	1.99e-07	0.0984848	0.258323	0.280719	0.0223959	-0.287323	3100	0.0254415	FDR 5%	NAM_JL_27	δT
αT		5_197904859	5	197904859	5.75e-11	2.24e-07	0.102617	0.258323	0.280589	0.0222662	-0.281596	3126	0.0256549	FDR 5%	NAM_JL_27	δT
αT		5_197905363	5	197905363	5.65e-11	2.2e-07	0.10124	0.258323	0.280607	0.022284	-0.285046	3116	0.0255728	FDR 5%	NAM_JL_27	δT
αT		5_197905840	5	197905840	5.75e-11	2.24e-07	0.102617	0.258323	0.280589	0.0222662	-0.281596	3127	0.0256631	FDR 5%	NAM_JL_27	δT
αT		5_197906097	5	197906097	5.97e-11	2.32e-07	0.101928	0.258323	0.28055	0.0222268	-0.282264	3135	0.0257288	FDR 5%	NAM_JL_27	δT
αT		5_197906330	5	197906330	1.96e-10	7.09e-07	0.0971074	0.258323	0.279325	0.0210019	-0.281494	3375	0.0276984	FDR 5%	NAM_JL_27	δT
αT		5_197906568	5	197906568	5.28e-10	1.74e-06	0.0984848	0.258323	0.278311	0.0199874	-0.272955	3687	0.030259	FDR 5%	NAM_JL_27	δT
αT		5_197906834	5	197906834	1.21e-10	4.48e-07	0.100551	0.258323	0.279825	0.0215023	-0.27829	3279	0.0269106	FDR 5%	NAM_JL_27	δT
αT		5_197907983	5	197907983	5.65e-11	2.2e-07	0.10124	0.258323	0.280607	0.022284	-0.285046	3117	0.025581	FDR 5%	NAM_JL_27	δT
αT		5_197908068	5	197908068	5.65e-11	2.2e-07	0.10124	0.258323	0.280607	0.022284	-0.285046	3118	0.0255892	FDR 5%	NAM_JL_27	δT
αT		5_197908414	5	197908414	5.65e-11	2.2e-07	0.10124	0.258323	0.280607	0.022284	-0.285046	3119	0.0255975	FDR 5%	NAM_JL_27	δT
αT		5_197908449	5	197908449	5.65e-11	2.2e-07	0.10124	0.258323	0.280607	0.022284	-0.285046	3120	0.0256057	FDR 5%	NAM_JL_27	δT
αT		5_197909124	5	197909124	5.65e-11	2.2e-07	0.10124	0.258323	0.280607	0.022284	-0.285046	3121	0.0256139	FDR 5%	NAM_JL_27	δT
αT		5_197909391	5	197909391	1.21e-10	4.48e-07	0.100551	0.258323	0.279825	0.0215023	-0.27829	3280	0.0269188	FDR 5%	NAM_JL_27	δT
αT		5_197909404	5	197909404	1.21e-10	4.48e-07	0.100551	0.258323	0.279825	0.0215023	-0.27829	3281	0.026927	FDR 5%	NAM_JL_27	δT
αT		5_197909844	5	197909844	4.82e-11	1.9e-07	0.0991736	0.258323	0.28077	0.0224467	-0.286772	3090	0.0253595	FDR 5%	NAM_JL_27	δT
αT		5_197909949	5	197909949	5.65e-11	2.2e-07	0.10124	0.258323	0.280607	0.022284	-0.285046	3122	0.0256221	FDR 5%	NAM_JL_27	δT
αT		5_197910067	5	197910067	2.79e-10	9.92e-07	0.102617	0.258323	0.278963	0.02064	-0.270445	3432	0.0281662	FDR 5%	NAM_JL_27	δT
αT		5_197910265	5	197910265	5.65e-11	2.2e-07	0.10124	0.258323	0.280607	0.022284	-0.285046	3123	0.0256303	FDR 5%	NAM_JL_27	δT
αT		5_197910594	5	197910594	5.65e-11	2.2e-07	0.10124	0.258323	0.280607	0.022284	-0.285046	3124	0.0256385	FDR 5%	NAM_JL_27	δT
αT		5_197910769	5	197910769	5.94e-11	2.31e-07	0.100551	0.258323	0.280556	0.0222328	-0.285586	3133	0.0257124	FDR 5%	NAM_JL_27	δT
αT		5_197910969	5	197910969	5.94e-11	2.31e-07	0.100551	0.258323	0.280556	0.0222328	-0.285586	3134	0.0257206	FDR 5%	NAM_JL_27	δT
αT		5_197911059	5	197911059	5.65e-11	2.2e-07	0.10124	0.258323	0.280607	0.022284	-0.285046	3125	0.0256467	FDR 5%	NAM_JL_27	δT
αT		5_197911293	5	197911293	8.76e-11	3.32e-07	0.104683	0.258323	0.280156	0.0218326	-0.273111	3217	0.0264017	FDR 5%	NAM_JL_27	δT
αT		5_197941102	5	197941102	3.48e-09	9.44e-06	0.106061	0.258323	0.276382	0.0180584	-0.244163	4490	0.0368492	FDR 5%	NAM_JL_27	δT
αT		5_197941156	5	197941156	3.48e-09	9.44e-06	0.106061	0.258323	0.276382	0.0180584	-0.244163	4491	0.0368574	FDR 5%	NAM_JL_27	δT
αT		5_197941171	5	197941171	3.48e-09	9.44e-06	0.106061	0.258323	0.276382	0.0180584	-0.244163	4492	0.0368656	FDR 5%	NAM_JL_27	δT
αT		5_197941263	5	197941263	3.48e-09	9.44e-06	0.106061	0.258323	0.276382	0.0180584	-0.244163	4493	0.0368738	FDR 5%	NAM_JL_27	δT
αT		5_197941520	5	197941520	3.48e-09	9.44e-06	0.106061	0.258323	0.276382	0.0180584	-0.244163	4494	0.036882	FDR 5%	NAM_JL_27	δT
αT		5_197941759	5	197941759	6.8e-09	1.67e-05	0.106749	0.258323	0.2757	0.0173767	-0.23859	4950	0.0406244	FDR 5%	NAM_JL_27	δT
αT		5_197942232	5	197942232	3.48e-09	9.44e-06	0.106061	0.258323	0.276382	0.0180584	-0.244163	4495	0.0368902	FDR 5%	NAM_JL_27	δT
αT		5_197942319	5	197942319	1.83e-09	5.47e-06	0.106749	0.258323	0.277038	0.0187147	-0.249958	4054	0.0332709	FDR 5%	NAM_JL_27	δT
αT		5_197942442	5	197942442	1.83e-09	5.47e-06	0.106749	0.258323	0.277038	0.0187147	-0.249958	4055	0.0332792	FDR 5%	NAM_JL_27	δT
αT		5_197942468	5	197942468	1.83e-09	5.47e-06	0.106749	0.258323	0.277038	0.0187147	-0.249958	4056	0.0332874	FDR 5%	NAM_JL_27	δT
αT		5_197942518	5	197942518	1.83e-09	5.47e-06	0.106749	0.258323	0.277038	0.0187147	-0.249958	4057	0.0332956	FDR 5%	NAM_JL_27	δT
αT		5_197942719	5	197942719	1.83e-09	5.47e-06	0.106749	0.258323	0.277038	0.0187147	-0.249958	4058	0.0333038	FDR 5%	NAM_JL_27	δT
αT		5_197942859	5	197942859	1.83e-09	5.47e-06	0.106749	0.258323	0.277038	0.0187147	-0.249958	4059	0.033312	FDR 5%	NAM_JL_27	δT
αT		5_197942894	5	197942894	1.83e-09	5.47e-06	0.106749	0.258323	0.277038	0.0187147	-0.249958	4060	0.0333202	FDR 5%	NAM_JL_27	δT
αT		5_197942954	5	197942954	1.83e-09	5.47e-06	0.106749	0.258323	0.277038	0.0187147	-0.249958	4061	0.0333284	FDR 5%	NAM_JL_27	δT
αT		5_197953406	5	197953406	1.83e-09	5.47e-06	0.106749	0.258323	0.277038	0.0187147	-0.249958	4062	0.0333366	FDR 5%	NAM_JL_27	δT
αT		5_197953407	5	197953407	1.83e-09	5.47e-06	0.106749	0.258323	0.277038	0.0187147	-0.249958	4063	0.0333448	FDR 5%	NAM_JL_27	δT
αT		5_197955052	5	197955052	1.83e-09	5.47e-06	0.106749	0.258323	0.277038	0.0187147	-0.249958	4064	0.033353	FDR 5%	NAM_JL_27	δT
αT		5_197955106	5	197955106	7.18e-09	1.76e-05	0.108127	0.258323	0.275644	0.0173213	-0.237234	4967	0.0407639	FDR 5%	NAM_JL_27	δT
αT		5_197955185	5	197955185	8.19e-10	2.63e-06	0.109504	0.258323	0.277861	0.0195379	-0.250878	3794	0.0311371	FDR 5%	NAM_JL_27	δT
αT		5_197955250	5	197955250	3.55e-09	9.61e-06	0.109504	0.258323	0.276362	0.0180384	-0.237618	4505	0.0369723	FDR 5%	NAM_JL_27	δT
αT		5_197955315	5	197955315	1.83e-09	5.47e-06	0.106749	0.258323	0.277038	0.0187147	-0.249958	4065	0.0333612	FDR 5%	NAM_JL_27	δT
αT		5_197955361	5	197955361	1.83e-09	5.47e-06	0.106749	0.258323	0.277038	0.0187147	-0.249958	4066	0.0333694	FDR 5%	NAM_JL_27	δT
αT		5_197955366	5	197955366	1.83e-09	5.47e-06	0.106749	0.258323	0.277038	0.0187147	-0.249958	4067	0.0333776	FDR 5%	NAM_JL_27	δT
αT		5_197955436	5	197955436	2.26e-08	5.04e-05	0.0943526	0.258323	0.27448	0.0161564	-0.241561	5467	0.0448674	FDR 5%	NAM_JL_27	δT
αT		5_197955574	5	197955574	9.5e-09	2.27e-05	0.0929752	0.258323	0.275359	0.0170361	-0.246814	5100	0.0418554	FDR 5%	NAM_JL_27	δT
αT		5_197955634	5	197955634	1.25e-08	2.91e-05	0.0936639	0.258323	0.275079	0.0167557	-0.243858	5238	0.042988	FDR 5%	NAM_JL_27	δT
αT		5_197956660	5	197956660	1.25e-05	0.016546	0.0647383	0.258323	0.268148	0.00982509	-0.202974	9189	0.0754136	FDR 5%	NAM_JL_27	δT
αT		5_197956690	5	197956690	7.74e-08	0.00015855	0.0812672	0.258323	0.273233	0.0149101	-0.248911	5947	0.0488067	FDR 5%	NAM_JL_27	δT
αT		5_197956776	5	197956776	4.08e-09	1.09e-05	0.0922865	0.258323	0.276221	0.017898	-0.254081	4541	0.0372677	FDR 5%	NAM_JL_27	δT
αT		5_197959174	5	197959174	2.14e-09	6.22e-06	0.109504	0.258323	0.27688	0.0185564	-0.245932	4187	0.0343625	FDR 5%	NAM_JL_27	δT
αT		5_197959225	5	197959225	5.57e-09	1.42e-05	0.103306	0.258323	0.275902	0.0175793	-0.245265	4788	0.0392948	FDR 5%	NAM_JL_27	δT
αT		5_197959853	5	197959853	4.47e-09	1.16e-05	0.0922865	0.258323	0.276127	0.0178041	-0.26081	4687	0.0384659	FDR 5%	NAM_JL_27	δT
αT		5_197959909	5	197959909	6.29e-07	0.00112728	0.0495868	0.258323	0.271124	0.0128008	-0.257284	6800	0.0558072	FDR 5%	NAM_JL_27	δT
αT		5_197960048	5	197960048	1.3e-06	0.00222098	0.0853994	0.258323	0.270397	0.0120736	-0.205972	7136	0.0585647	FDR 5%	NAM_JL_27	δT
αT		5_197960071	5	197960071	1.6e-06	0.00269723	0.077135	0.258323	0.270187	0.0118638	-0.217634	7249	0.0594921	FDR 5%	NAM_JL_27	δT
αT		5_197960360	5	197960360	9.15e-07	0.0016004	0.0819559	0.258323	0.270749	0.0124254	-0.208581	6967	0.0571778	FDR 5%	NAM_JL_27	δT
αT		5_197960672	5	197960672	3.48e-09	9.44e-06	0.106061	0.258323	0.276382	0.0180584	-0.244163	4496	0.0368984	FDR 5%	NAM_JL_27	δT
αT		5_197960675	5	197960675	1.83e-09	5.47e-06	0.106749	0.258323	0.277038	0.0187147	-0.249958	4068	0.0333858	FDR 5%	NAM_JL_27	δT
αT		5_197964133	5	197964133	4.56e-09	1.18e-05	0.108127	0.258323	0.276107	0.0177834	-0.240317	4695	0.0385316	FDR 5%	NAM_JL_27	δT
αT		5_197964236	5	197964236	1.83e-09	5.47e-06	0.106749	0.258323	0.277038	0.0187147	-0.249958	4069	0.0333941	FDR 5%	NAM_JL_27	δT
αT		5_197964540	5	197964540	1.83e-09	5.47e-06	0.106749	0.258323	0.277038	0.0187147	-0.249958	4070	0.0334023	FDR 5%	NAM_JL_27	δT
αT		5_197964966	5	197964966	2.55e-07	0.000482274	0.0826446	0.258323	0.272031	0.0137081	-0.215192	6441	0.0528609	FDR 5%	NAM_JL_27	δT
αT		5_197965469	5	197965469	3.28e-10	1.15e-06	0.0936639	0.258323	0.2788	0.0204766	-0.286155	3465	0.0284371	FDR 5%	NAM_JL_27	δT
αT		5_197965782	5	197965782	1.29e-05	0.0170254	0.0984848	0.258323	0.268116	0.00979267	-0.180941	9228	0.0757337	FDR 5%	NAM_JL_27	δT
αT		5_197966916	5	197966916	1.15e-08	2.68e-05	0.107438	0.258323	0.275168	0.0168452	-0.235859	5206	0.0427253	FDR 5%	NAM_JL_27	δT
αT		5_197966984	5	197966984	1.15e-08	2.68e-05	0.107438	0.258323	0.275168	0.0168452	-0.235859	5207	0.0427336	FDR 5%	NAM_JL_27	δT
αT		5_197967110	5	197967110	1.15e-08	2.68e-05	0.107438	0.258323	0.275168	0.0168452	-0.235859	5208	0.0427418	FDR 5%	NAM_JL_27	δT
αT		5_197967125	5	197967125	1.15e-08	2.68e-05	0.107438	0.258323	0.275168	0.0168452	-0.235859	5209	0.04275	FDR 5%	NAM_JL_27	δT
αT		5_197967139	5	197967139	1.15e-08	2.68e-05	0.107438	0.258323	0.275168	0.0168452	-0.235859	5210	0.0427582	FDR 5%	NAM_JL_27	δT
αT		5_197967375	5	197967375	1.83e-09	5.47e-06	0.106749	0.258323	0.277038	0.0187147	-0.249958	4071	0.0334105	FDR 5%	NAM_JL_27	δT
αT		5_197967421	5	197967421	1.83e-09	5.47e-06	0.106749	0.258323	0.277038	0.0187147	-0.249958	4072	0.0334187	FDR 5%	NAM_JL_27	δT
αT		5_197967861	5	197967861	1.83e-09	5.47e-06	0.106749	0.258323	0.277038	0.0187147	-0.249958	4073	0.0334269	FDR 5%	NAM_JL_27	δT
αT		5_197967940	5	197967940	1.83e-09	5.47e-06	0.106749	0.258323	0.277038	0.0187147	-0.249958	4074	0.0334351	FDR 5%	NAM_JL_27	δT
αT		5_197968519	5	197968519	1.83e-09	5.47e-06	0.106749	0.258323	0.277038	0.0187147	-0.249958	4075	0.0334433	FDR 5%	NAM_JL_27	δT
αT		5_197968870	5	197968870	1.83e-09	5.47e-06	0.106749	0.258323	0.277038	0.0187147	-0.249958	4076	0.0334515	FDR 5%	NAM_JL_27	δT
αT		5_197969892	5	197969892	5.82e-09	1.47e-05	0.107438	0.258323	0.275858	0.0175345	-0.240975	4825	0.0395985	FDR 5%	NAM_JL_27	δT
αT		5_197969894	5	197969894	5.82e-09	1.47e-05	0.107438	0.258323	0.275858	0.0175345	-0.240975	4826	0.0396067	FDR 5%	NAM_JL_27	δT
αT		5_197969899	5	197969899	5.82e-09	1.47e-05	0.107438	0.258323	0.275858	0.0175345	-0.240975	4827	0.0396149	FDR 5%	NAM_JL_27	δT
αT		5_197969909	5	197969909	5.82e-09	1.47e-05	0.107438	0.258323	0.275858	0.0175345	-0.240975	4828	0.0396231	FDR 5%	NAM_JL_27	δT
αT		5_197970094	5	197970094	1.83e-09	5.47e-06	0.106749	0.258323	0.277038	0.0187147	-0.249958	4077	0.0334597	FDR 5%	NAM_JL_27	δT
αT		5_197970158	5	197970158	1.83e-09	5.47e-06	0.106749	0.258323	0.277038	0.0187147	-0.249958	4078	0.0334679	FDR 5%	NAM_JL_27	δT
αT		5_197970189	5	197970189	5.82e-09	1.47e-05	0.107438	0.258323	0.275858	0.0175345	-0.240975	4829	0.0396313	FDR 5%	NAM_JL_27	δT
αT		5_197985843	5	197985843	5.82e-09	1.47e-05	0.107438	0.258323	0.275858	0.0175345	-0.240975	4830	0.0396395	FDR 5%	NAM_JL_27	δT
αT		5_197985956	5	197985956	5.82e-09	1.47e-05	0.107438	0.258323	0.275858	0.0175345	-0.240975	4831	0.0396477	FDR 5%	NAM_JL_27	δT
αT		5_197987432	5	197987432	2.13e-08	4.77e-05	0.108815	0.258323	0.274537	0.0162143	-0.22867	5446	0.044695	FDR 5%	NAM_JL_27	δT
αT		5_197987474	5	197987474	5.82e-09	1.47e-05	0.107438	0.258323	0.275858	0.0175345	-0.240975	4832	0.0396559	FDR 5%	NAM_JL_27	δT
αT		5_197987506	5	197987506	4.11e-09	1.1e-05	0.109504	0.258323	0.276213	0.0178898	-0.240261	4548	0.0373252	FDR 5%	NAM_JL_27	δT
αT		5_197987640	5	197987640	5.82e-09	1.47e-05	0.107438	0.258323	0.275858	0.0175345	-0.240975	4833	0.0396642	FDR 5%	NAM_JL_27	δT
αT		5_197987850	5	197987850	5.82e-09	1.47e-05	0.107438	0.258323	0.275858	0.0175345	-0.240975	4834	0.0396724	FDR 5%	NAM_JL_27	δT
αT		5_197987911	5	197987911	5.82e-09	1.47e-05	0.107438	0.258323	0.275858	0.0175345	-0.240975	4835	0.0396806	FDR 5%	NAM_JL_27	δT
αT		5_197987915	5	197987915	5.82e-09	1.47e-05	0.107438	0.258323	0.275858	0.0175345	-0.240975	4836	0.0396888	FDR 5%	NAM_JL_27	δT
αT		5_197987995	5	197987995	5.82e-09	1.47e-05	0.107438	0.258323	0.275858	0.0175345	-0.240975	4837	0.039697	FDR 5%	NAM_JL_27	δT
αT		5_197988061	5	197988061	5.82e-09	1.47e-05	0.107438	0.258323	0.275858	0.0175345	-0.240975	4838	0.0397052	FDR 5%	NAM_JL_27	δT
αT		5_197988344	5	197988344	5.82e-09	1.47e-05	0.107438	0.258323	0.275858	0.0175345	-0.240975	4839	0.0397134	FDR 5%	NAM_JL_27	δT
αT		5_197988441	5	197988441	5.82e-09	1.47e-05	0.107438	0.258323	0.275858	0.0175345	-0.240975	4840	0.0397216	FDR 5%	NAM_JL_27	δT
αT		5_197988687	5	197988687	5.82e-09	1.47e-05	0.107438	0.258323	0.275858	0.0175345	-0.240975	4841	0.0397298	FDR 5%	NAM_JL_27	δT
αT		5_197995774	5	197995774	3.26e-09	8.88e-06	0.103306	0.258323	0.276448	0.0181246	-0.252293	4452	0.0365373	FDR 5%	NAM_JL_27	δT
αT		5_197996086	5	197996086	1.06e-07	0.000212477	0.109504	0.258323	0.272915	0.0145919	-0.212659	6082	0.0499146	FDR 5%	NAM_JL_27	δT
αT		5_197996288	5	197996288	3.26e-09	8.88e-06	0.103306	0.258323	0.276448	0.0181246	-0.252293	4453	0.0365455	FDR 5%	NAM_JL_27	δT
αT		5_197996332	5	197996332	3.26e-09	8.88e-06	0.103306	0.258323	0.276448	0.0181246	-0.252293	4454	0.0365537	FDR 5%	NAM_JL_27	δT
αT		5_197996447	5	197996447	3.26e-09	8.88e-06	0.103306	0.258323	0.276448	0.0181246	-0.252293	4455	0.0365619	FDR 5%	NAM_JL_27	δT
αT		5_197996451	5	197996451	1.29e-08	2.99e-05	0.104683	0.258323	0.275049	0.0167256	-0.239001	5257	0.0431439	FDR 5%	NAM_JL_27	δT
αT		5_197996900	5	197996900	4.12e-09	1.1e-05	0.105372	0.258323	0.276211	0.0178882	-0.246082	4550	0.0373416	FDR 5%	NAM_JL_27	δT
αT		5_197996937	5	197996937	3.26e-09	8.88e-06	0.103306	0.258323	0.276448	0.0181246	-0.252293	4456	0.0365701	FDR 5%	NAM_JL_27	δT
αT		5_197997480	5	197997480	1.29e-08	2.99e-05	0.104683	0.258323	0.275049	0.0167256	-0.239001	5258	0.0431521	FDR 5%	NAM_JL_27	δT
αT		5_197997622	5	197997622	3.26e-09	8.88e-06	0.103306	0.258323	0.276448	0.0181246	-0.252293	4457	0.0365783	FDR 5%	NAM_JL_27	δT
αT		5_197997735	5	197997735	3.26e-09	8.88e-06	0.103306	0.258323	0.276448	0.0181246	-0.252293	4458	0.0365866	FDR 5%	NAM_JL_27	δT
αT		5_197997904	5	197997904	3.26e-09	8.88e-06	0.103306	0.258323	0.276448	0.0181246	-0.252293	4459	0.0365948	FDR 5%	NAM_JL_27	δT
αT		5_197997915	5	197997915	3.26e-09	8.88e-06	0.103306	0.258323	0.276448	0.0181246	-0.252293	4460	0.036603	FDR 5%	NAM_JL_27	δT
αT		5_197997990	5	197997990	1.29e-08	2.99e-05	0.104683	0.258323	0.275049	0.0167256	-0.239001	5259	0.0431603	FDR 5%	NAM_JL_27	δT
αT		5_197998018	5	197998018	1.29e-08	2.99e-05	0.104683	0.258323	0.275049	0.0167256	-0.239001	5260	0.0431685	FDR 5%	NAM_JL_27	δT
αT		5_197998145	5	197998145	1.29e-08	2.99e-05	0.104683	0.258323	0.275049	0.0167256	-0.239001	5261	0.0431767	FDR 5%	NAM_JL_27	δT
αT		5_197998162	5	197998162	3.26e-09	8.88e-06	0.103306	0.258323	0.276448	0.0181246	-0.252293	4461	0.0366112	FDR 5%	NAM_JL_27	δT
αT		5_197998207	5	197998207	2.64e-09	7.39e-06	0.105372	0.258323	0.276665	0.0183423	-0.25017	4347	0.0356756	FDR 5%	NAM_JL_27	δT
αT		5_197998507	5	197998507	2.8e-09	7.82e-06	0.103994	0.258323	0.276603	0.0182802	-0.250315	4367	0.0358397	FDR 5%	NAM_JL_27	δT
αT		5_197998766	5	197998766	3.26e-09	8.88e-06	0.103306	0.258323	0.276448	0.0181246	-0.252293	4462	0.0366194	FDR 5%	NAM_JL_27	δT
αT		5_197999013	5	197999013	2.2e-09	6.38e-06	0.101928	0.258323	0.276851	0.0185278	-0.25718	4197	0.0344445	FDR 5%	NAM_JL_27	δT
αT		5_197999037	5	197999037	3.26e-09	8.88e-06	0.103306	0.258323	0.276448	0.0181246	-0.252293	4463	0.0366276	FDR 5%	NAM_JL_27	δT
αT		5_197999152	5	197999152	1.29e-08	2.99e-05	0.104683	0.258323	0.275049	0.0167256	-0.239001	5262	0.0431849	FDR 5%	NAM_JL_27	δT
αT		5_197999181	5	197999181	1.29e-08	2.99e-05	0.104683	0.258323	0.275049	0.0167256	-0.239001	5263	0.0431931	FDR 5%	NAM_JL_27	δT
αT		5_197999209	5	197999209	3.26e-09	8.88e-06	0.103306	0.258323	0.276448	0.0181246	-0.252293	4464	0.0366358	FDR 5%	NAM_JL_27	δT
αT		5_197999210	5	197999210	7.84e-09	1.91e-05	0.108127	0.258323	0.275555	0.0172315	-0.238846	4990	0.0409526	FDR 5%	NAM_JL_27	δT
αT		5_197999249	5	197999249	1.29e-08	2.99e-05	0.104683	0.258323	0.275049	0.0167256	-0.239001	5264	0.0432013	FDR 5%	NAM_JL_27	δT
αT		5_197999299	5	197999299	5.12e-09	1.31e-05	0.102617	0.258323	0.275989	0.0176657	-0.249183	4744	0.0389337	FDR 5%	NAM_JL_27	δT
αT		5_197999344	5	197999344	5.76e-07	0.00103737	0.0867769	0.258323	0.271212	0.0128889	-0.210637	6768	0.0555446	FDR 5%	NAM_JL_27	δT
αT		5_197999439	5	197999439	3.26e-09	8.88e-06	0.103306	0.258323	0.276448	0.0181246	-0.252293	4465	0.036644	FDR 5%	NAM_JL_27	δT
αT		5_197999514	5	197999514	3.26e-09	8.88e-06	0.103306	0.258323	0.276448	0.0181246	-0.252293	4466	0.0366522	FDR 5%	NAM_JL_27	δT
αT		5_197999523	5	197999523	3.26e-09	8.88e-06	0.103306	0.258323	0.276448	0.0181246	-0.252293	4467	0.0366604	FDR 5%	NAM_JL_27	δT
αT		5_197999617	5	197999617	3.26e-09	8.88e-06	0.103306	0.258323	0.276448	0.0181246	-0.252293	4468	0.0366686	FDR 5%	NAM_JL_27	δT
αT		5_197999737	5	197999737	3.26e-09	8.88e-06	0.103306	0.258323	0.276448	0.0181246	-0.252293	4469	0.0366768	FDR 5%	NAM_JL_27	δT
αT		5_197999752	5	197999752	7.12e-10	2.31e-06	0.110193	0.258323	0.278004	0.0196805	-0.248589	3756	0.0308253	FDR 5%	NAM_JL_27	δT
αT		5_197999823	5	197999823	3.26e-09	8.88e-06	0.103306	0.258323	0.276448	0.0181246	-0.252293	4470	0.036685	FDR 5%	NAM_JL_27	δT
αT		5_198000262	5	198000262	1e-08	2.38e-05	0.106749	0.258323	0.275302	0.0169793	-0.237601	5141	0.0421919	FDR 5%	NAM_JL_27	δT
αT		5_198000585	5	198000585	3.13e-09	8.61e-06	0.0943526	0.258323	0.276492	0.0181685	-0.266893	4423	0.0362993	FDR 5%	NAM_JL_27	δT
αT		5_198003224	5	198003224	3.26e-09	8.88e-06	0.103306	0.258323	0.276448	0.0181246	-0.252293	4471	0.0366932	FDR 5%	NAM_JL_27	δT
αT		5_198003290	5	198003290	3.36e-08	7.29e-05	0.102617	0.258323	0.274077	0.0157534	-0.231595	5617	0.0460984	FDR 5%	NAM_JL_27	δT
αT		5_198003366	5	198003366	3.26e-09	8.88e-06	0.103306	0.258323	0.276448	0.0181246	-0.252293	4472	0.0367014	FDR 5%	NAM_JL_27	δT
αT		5_198003387	5	198003387	1.36e-09	4.21e-06	0.102617	0.258323	0.277342	0.0190186	-0.259614	3932	0.0322697	FDR 5%	NAM_JL_27	δT
αT		5_198003511	5	198003511	3.36e-08	7.29e-05	0.102617	0.258323	0.274077	0.0157534	-0.231595	5618	0.0461066	FDR 5%	NAM_JL_27	δT
αT		5_198003542	5	198003542	8.96e-09	2.15e-05	0.10124	0.258323	0.275419	0.017096	-0.244649	5081	0.0416995	FDR 5%	NAM_JL_27	δT
αT		5_198003588	5	198003588	6.38e-09	1.58e-05	0.103306	0.258323	0.275765	0.0174419	-0.243689	4921	0.0403864	FDR 5%	NAM_JL_27	δT
αT		5_198003593	5	198003593	2.37e-08	5.26e-05	0.104683	0.258323	0.274431	0.0161078	-0.231048	5489	0.0450479	FDR 5%	NAM_JL_27	δT
αT		5_198003644	5	198003644	2.37e-08	5.26e-05	0.104683	0.258323	0.274431	0.0161078	-0.231048	5490	0.0450561	FDR 5%	NAM_JL_27	δT
αT		5_198003664	5	198003664	8.96e-09	2.15e-05	0.10124	0.258323	0.275419	0.017096	-0.244649	5082	0.0417077	FDR 5%	NAM_JL_27	δT
αT		5_198003988	5	198003988	3.7e-08	7.97e-05	0.106061	0.258323	0.273981	0.0156578	-0.229417	5648	0.0463528	FDR 5%	NAM_JL_27	δT
αT		5_198003992	5	198003992	3.26e-09	8.88e-06	0.103306	0.258323	0.276448	0.0181246	-0.252293	4473	0.0367097	FDR 5%	NAM_JL_27	δT
αT		5_198003997	5	198003997	3.26e-09	8.88e-06	0.103306	0.258323	0.276448	0.0181246	-0.252293	4474	0.0367179	FDR 5%	NAM_JL_27	δT
αT		5_198004154	5	198004154	3.26e-09	8.88e-06	0.103306	0.258323	0.276448	0.0181246	-0.252293	4475	0.0367261	FDR 5%	NAM_JL_27	δT
αT		5_198004160	5	198004160	3.26e-09	8.88e-06	0.103306	0.258323	0.276448	0.0181246	-0.252293	4476	0.0367343	FDR 5%	NAM_JL_27	δT
αT		5_198034159	5	198034159	1.97e-09	5.79e-06	0.102617	0.258323	0.276964	0.0186408	-0.252993	4090	0.0335664	FDR 5%	NAM_JL_27	δT
αT		5_198034405	5	198034405	1.97e-09	5.79e-06	0.102617	0.258323	0.276964	0.0186408	-0.252993	4091	0.0335746	FDR 5%	NAM_JL_27	δT
αT		5_198037526	5	198037526	3.27e-10	1.15e-06	0.105372	0.258323	0.278802	0.0204784	-0.264467	3463	0.0284206	FDR 5%	NAM_JL_27	δT
αT		5_198037634	5	198037634	3.27e-10	1.15e-06	0.105372	0.258323	0.278802	0.0204784	-0.264467	3464	0.0284289	FDR 5%	NAM_JL_27	δT
αT		5_198037696	5	198037696	1.42e-09	4.38e-06	0.106749	0.258323	0.277301	0.0189774	-0.251108	3942	0.0323518	FDR 5%	NAM_JL_27	δT
αT		5_198037804	5	198037804	5.11e-10	1.69e-06	0.103994	0.258323	0.278344	0.0200209	-0.263463	3686	0.0302508	FDR 5%	NAM_JL_27	δT
αT		5_198037850	5	198037850	4.5e-10	1.5e-06	0.103306	0.258323	0.278474	0.0201508	-0.266059	3556	0.0291839	FDR 5%	NAM_JL_27	δT
αT		5_198037998	5	198037998	4.5e-10	1.5e-06	0.103306	0.258323	0.278474	0.0201508	-0.266059	3557	0.0291921	FDR 5%	NAM_JL_27	δT
αT		5_198038012	5	198038012	1.98e-09	5.79e-06	0.104683	0.258323	0.276959	0.0186356	-0.252242	4092	0.0335828	FDR 5%	NAM_JL_27	δT
αT		5_198038186	5	198038186	4.5e-10	1.5e-06	0.103306	0.258323	0.278474	0.0201508	-0.266059	3558	0.0292003	FDR 5%	NAM_JL_27	δT
αT		5_198038229	5	198038229	1.98e-09	5.79e-06	0.104683	0.258323	0.276959	0.0186356	-0.252242	4093	0.033591	FDR 5%	NAM_JL_27	δT
αT		5_198038306	5	198038306	1.98e-09	5.79e-06	0.104683	0.258323	0.276959	0.0186356	-0.252242	4094	0.0335992	FDR 5%	NAM_JL_27	δT
αT		5_198038324	5	198038324	2.41e-09	6.86e-06	0.105372	0.258323	0.276758	0.0184351	-0.249047	4274	0.0350765	FDR 5%	NAM_JL_27	δT
αT		5_198038452	5	198038452	9.8e-09	2.33e-05	0.0909091	0.258323	0.275328	0.0170047	-0.238185	5119	0.0420113	FDR 5%	NAM_JL_27	δT
αT		5_198038461	5	198038461	9.8e-09	2.33e-05	0.0909091	0.258323	0.275328	0.0170047	-0.238185	5120	0.0420195	FDR 5%	NAM_JL_27	δT
αT		5_198038488	5	198038488	7.07e-09	1.73e-05	0.0929752	0.258323	0.275661	0.0173374	-0.237215	4963	0.0407311	FDR 5%	NAM_JL_27	δT
αT		5_198039944	5	198039944	2.35e-08	5.23e-05	0.0922865	0.258323	0.274438	0.0161152	-0.24457	5485	0.0450151	FDR 5%	NAM_JL_27	δT
αT		5_198040212	5	198040212	5.4e-09	1.38e-05	0.0909091	0.258323	0.275934	0.0176109	-0.25994	4761	0.0390733	FDR 5%	NAM_JL_27	δT
αT		5_198040251	5	198040251	5.4e-09	1.38e-05	0.0909091	0.258323	0.275934	0.0176109	-0.25994	4762	0.0390815	FDR 5%	NAM_JL_27	δT
αT		5_198040303	5	198040303	5.4e-09	1.38e-05	0.0909091	0.258323	0.275934	0.0176109	-0.25994	4763	0.0390897	FDR 5%	NAM_JL_27	δT
αT		5_198040308	5	198040308	2.35e-08	5.23e-05	0.0922865	0.258323	0.274438	0.0161152	-0.24457	5486	0.0450233	FDR 5%	NAM_JL_27	δT
αT		5_198040552	5	198040552	1.98e-09	5.79e-06	0.104683	0.258323	0.276959	0.0186356	-0.252242	4095	0.0336074	FDR 5%	NAM_JL_27	δT
αT		5_198040723	5	198040723	4.5e-10	1.5e-06	0.103306	0.258323	0.278474	0.0201508	-0.266059	3559	0.0292085	FDR 5%	NAM_JL_27	δT
αT		5_198040760	5	198040760	1.17e-08	2.73e-05	0.107438	0.258323	0.27515	0.0168267	-0.236373	5218	0.0428238	FDR 5%	NAM_JL_27	δT
αT		5_198040766	5	198040766	4.5e-10	1.5e-06	0.103306	0.258323	0.278474	0.0201508	-0.266059	3560	0.0292167	FDR 5%	NAM_JL_27	δT
αT		5_198040810	5	198040810	4.5e-10	1.5e-06	0.103306	0.258323	0.278474	0.0201508	-0.266059	3561	0.0292249	FDR 5%	NAM_JL_27	δT
αT		5_198040830	5	198040830	1.98e-09	5.79e-06	0.104683	0.258323	0.276959	0.0186356	-0.252242	4096	0.0336156	FDR 5%	NAM_JL_27	δT
αT		5_198040836	5	198040836	4.5e-10	1.5e-06	0.103306	0.258323	0.278474	0.0201508	-0.266059	3562	0.0292331	FDR 5%	NAM_JL_27	δT
αT		5_198040902	5	198040902	4.5e-10	1.5e-06	0.103306	0.258323	0.278474	0.0201508	-0.266059	3563	0.0292413	FDR 5%	NAM_JL_27	δT
αT		5_198040952	5	198040952	4.5e-10	1.5e-06	0.103306	0.258323	0.278474	0.0201508	-0.266059	3564	0.0292495	FDR 5%	NAM_JL_27	δT
αT		5_198040970	5	198040970	4.5e-10	1.5e-06	0.103306	0.258323	0.278474	0.0201508	-0.266059	3565	0.0292578	FDR 5%	NAM_JL_27	δT
αT		5_198040980	5	198040980	1.98e-09	5.79e-06	0.104683	0.258323	0.276959	0.0186356	-0.252242	4097	0.0336238	FDR 5%	NAM_JL_27	δT
αT		5_198040992	5	198040992	1.98e-09	5.79e-06	0.104683	0.258323	0.276959	0.0186356	-0.252242	4098	0.0336321	FDR 5%	NAM_JL_27	δT
αT		5_198041128	5	198041128	1.98e-09	5.79e-06	0.104683	0.258323	0.276959	0.0186356	-0.252242	4099	0.0336403	FDR 5%	NAM_JL_27	δT
αT		5_198041176	5	198041176	4.5e-10	1.5e-06	0.103306	0.258323	0.278474	0.0201508	-0.266059	3566	0.029266	FDR 5%	NAM_JL_27	δT
αT		5_198041259	5	198041259	4.5e-10	1.5e-06	0.103306	0.258323	0.278474	0.0201508	-0.266059	3567	0.0292742	FDR 5%	NAM_JL_27	δT
αT		5_198041339	5	198041339	4.5e-10	1.5e-06	0.103306	0.258323	0.278474	0.0201508	-0.266059	3568	0.0292824	FDR 5%	NAM_JL_27	δT
αT		5_198041561	5	198041561	4.5e-10	1.5e-06	0.103306	0.258323	0.278474	0.0201508	-0.266059	3569	0.0292906	FDR 5%	NAM_JL_27	δT
αT		5_198041588	5	198041588	4.5e-10	1.5e-06	0.103306	0.258323	0.278474	0.0201508	-0.266059	3570	0.0292988	FDR 5%	NAM_JL_27	δT
αT		5_198041641	5	198041641	1.98e-09	5.79e-06	0.104683	0.258323	0.276959	0.0186356	-0.252242	4100	0.0336485	FDR 5%	NAM_JL_27	δT
αT		5_198041644	5	198041644	4.5e-10	1.5e-06	0.103306	0.258323	0.278474	0.0201508	-0.266059	3571	0.029307	FDR 5%	NAM_JL_27	δT
αT		5_198042114	5	198042114	4.5e-10	1.5e-06	0.103306	0.258323	0.278474	0.0201508	-0.266059	3572	0.0293152	FDR 5%	NAM_JL_27	δT
αT		5_198042140	5	198042140	4.5e-10	1.5e-06	0.103306	0.258323	0.278474	0.0201508	-0.266059	3573	0.0293234	FDR 5%	NAM_JL_27	δT
αT		5_198042144	5	198042144	1.53e-09	4.68e-06	0.143251	0.258323	0.277221	0.0188983	-0.215706	3985	0.0327047	FDR 5%	NAM_JL_27	δT
αT		5_198042225	5	198042225	4.5e-10	1.5e-06	0.103306	0.258323	0.278474	0.0201508	-0.266059	3574	0.0293316	FDR 5%	NAM_JL_27	δT
αT		5_198042274	5	198042274	4.5e-10	1.5e-06	0.103306	0.258323	0.278474	0.0201508	-0.266059	3575	0.0293398	FDR 5%	NAM_JL_27	δT
αT		5_198042282	5	198042282	1.98e-09	5.79e-06	0.104683	0.258323	0.276959	0.0186356	-0.252242	4101	0.0336567	FDR 5%	NAM_JL_27	δT
αT		5_198042302	5	198042302	1.98e-09	5.79e-06	0.104683	0.258323	0.276959	0.0186356	-0.252242	4102	0.0336649	FDR 5%	NAM_JL_27	δT
αT		5_198042350	5	198042350	4.5e-10	1.5e-06	0.103306	0.258323	0.278474	0.0201508	-0.266059	3576	0.029348	FDR 5%	NAM_JL_27	δT
αT		5_198042389	5	198042389	3.77e-05	0.0426475	0.30303	0.258323	0.26706	0.00873662	-0.10705	10757	0.0882821	FDR 5%	NAM_JL_27	δT
αT		5_198042691	5	198042691	4.5e-10	1.5e-06	0.103306	0.258323	0.278474	0.0201508	-0.266059	3577	0.0293562	FDR 5%	NAM_JL_27	δT
αT		5_198042712	5	198042712	4.5e-10	1.5e-06	0.103306	0.258323	0.278474	0.0201508	-0.266059	3578	0.0293644	FDR 5%	NAM_JL_27	δT
αT		5_198042738	5	198042738	4.5e-10	1.5e-06	0.103306	0.258323	0.278474	0.0201508	-0.266059	3579	0.0293726	FDR 5%	NAM_JL_27	δT
αT		5_198042740	5	198042740	4.5e-10	1.5e-06	0.103306	0.258323	0.278474	0.0201508	-0.266059	3580	0.0293809	FDR 5%	NAM_JL_27	δT
αT		5_198042806	5	198042806	4.5e-10	1.5e-06	0.103306	0.258323	0.278474	0.0201508	-0.266059	3581	0.0293891	FDR 5%	NAM_JL_27	δT
αT		5_198042847	5	198042847	4.5e-10	1.5e-06	0.103306	0.258323	0.278474	0.0201508	-0.266059	3582	0.0293973	FDR 5%	NAM_JL_27	δT
αT		5_198042849	5	198042849	4.5e-10	1.5e-06	0.103306	0.258323	0.278474	0.0201508	-0.266059	3583	0.0294055	FDR 5%	NAM_JL_27	δT
αT		5_198043190	5	198043190	1.98e-09	5.79e-06	0.104683	0.258323	0.276959	0.0186356	-0.252242	4103	0.0336731	FDR 5%	NAM_JL_27	δT
αT		5_198043334	5	198043334	4.5e-10	1.5e-06	0.103306	0.258323	0.278474	0.0201508	-0.266059	3584	0.0294137	FDR 5%	NAM_JL_27	δT
αT		5_198043347	5	198043347	1.17e-08	2.73e-05	0.107438	0.258323	0.27515	0.0168267	-0.236373	5219	0.042832	FDR 5%	NAM_JL_27	δT
αT		5_198043354	5	198043354	1.98e-09	5.79e-06	0.104683	0.258323	0.276959	0.0186356	-0.252242	4104	0.0336813	FDR 5%	NAM_JL_27	δT
αT		5_198043390	5	198043390	3.79e-11	1.52e-07	0.0915978	0.258323	0.281018	0.0226952	-0.308227	3044	0.0249819	FDR 5%	NAM_JL_27	δT
αT		5_198043467	5	198043467	4.5e-10	1.5e-06	0.103306	0.258323	0.278474	0.0201508	-0.266059	3585	0.0294219	FDR 5%	NAM_JL_27	δT
αT		5_198043561	5	198043561	4.5e-10	1.5e-06	0.103306	0.258323	0.278474	0.0201508	-0.266059	3586	0.0294301	FDR 5%	NAM_JL_27	δT
αT		5_198043611	5	198043611	4.5e-10	1.5e-06	0.103306	0.258323	0.278474	0.0201508	-0.266059	3587	0.0294383	FDR 5%	NAM_JL_27	δT
αT		5_198043645	5	198043645	4.12e-09	1.1e-05	0.103994	0.258323	0.27621	0.0178869	-0.248127	4559	0.0374155	FDR 5%	NAM_JL_27	δT
αT		5_198043751	5	198043751	2.89e-10	1.02e-06	0.101928	0.258323	0.278927	0.0206042	-0.27132	3436	0.0281991	FDR 5%	NAM_JL_27	δT
αT		5_198043780	5	198043780	2.54e-09	7.2e-06	0.106061	0.258323	0.276702	0.0183785	-0.247946	4309	0.0353637	FDR 5%	NAM_JL_27	δT
αT		5_198044077	5	198044077	1.98e-09	5.79e-06	0.104683	0.258323	0.276959	0.0186356	-0.252242	4105	0.0336895	FDR 5%	NAM_JL_27	δT
αT		5_198044280	5	198044280	8.11e-10	2.6e-06	0.103994	0.258323	0.277871	0.0195475	-0.260316	3793	0.0311289	FDR 5%	NAM_JL_27	δT
αT		5_198044572	5	198044572	4.5e-10	1.5e-06	0.103306	0.258323	0.278474	0.0201508	-0.266059	3588	0.0294465	FDR 5%	NAM_JL_27	δT
αT		5_198044773	5	198044773	1.98e-09	5.79e-06	0.104683	0.258323	0.276959	0.0186356	-0.252242	4106	0.0336977	FDR 5%	NAM_JL_27	δT
αT		5_198044804	5	198044804	1.98e-09	5.79e-06	0.104683	0.258323	0.276959	0.0186356	-0.252242	4107	0.0337059	FDR 5%	NAM_JL_27	δT
αT		5_198044854	5	198044854	4.5e-10	1.5e-06	0.103306	0.258323	0.278474	0.0201508	-0.266059	3589	0.0294547	FDR 5%	NAM_JL_27	δT
αT		5_198045088	5	198045088	4.5e-10	1.5e-06	0.103306	0.258323	0.278474	0.0201508	-0.266059	3590	0.0294629	FDR 5%	NAM_JL_27	δT
αT		5_198045147	5	198045147	4.5e-10	1.5e-06	0.103306	0.258323	0.278474	0.0201508	-0.266059	3591	0.0294711	FDR 5%	NAM_JL_27	δT
αT		5_198045287	5	198045287	4.5e-10	1.5e-06	0.103306	0.258323	0.278474	0.0201508	-0.266059	3592	0.0294793	FDR 5%	NAM_JL_27	δT
αT		5_198045312	5	198045312	4.5e-10	1.5e-06	0.103306	0.258323	0.278474	0.0201508	-0.266059	3593	0.0294875	FDR 5%	NAM_JL_27	δT
αT		5_198045563	5	198045563	7.43e-07	0.00131567	0.119835	0.258323	0.270957	0.0126342	-0.189762	6880	0.0564638	FDR 5%	NAM_JL_27	δT
αT		5_198045676	5	198045676	4.5e-10	1.5e-06	0.103306	0.258323	0.278474	0.0201508	-0.266059	3594	0.0294958	FDR 5%	NAM_JL_27	δT
αT		5_198045855	5	198045855	4.5e-10	1.5e-06	0.103306	0.258323	0.278474	0.0201508	-0.266059	3595	0.029504	FDR 5%	NAM_JL_27	δT
αT		5_198045931	5	198045931	4.5e-10	1.5e-06	0.103306	0.258323	0.278474	0.0201508	-0.266059	3596	0.0295122	FDR 5%	NAM_JL_27	δT
αT		5_198046118	5	198046118	4.5e-10	1.5e-06	0.103306	0.258323	0.278474	0.0201508	-0.266059	3597	0.0295204	FDR 5%	NAM_JL_27	δT
αT		5_198046146	5	198046146	4.5e-10	1.5e-06	0.103306	0.258323	0.278474	0.0201508	-0.266059	3598	0.0295286	FDR 5%	NAM_JL_27	δT
αT		5_198046666	5	198046666	1.98e-09	5.79e-06	0.104683	0.258323	0.276959	0.0186356	-0.252242	4108	0.0337141	FDR 5%	NAM_JL_27	δT
αT		5_198046773	5	198046773	4.5e-10	1.5e-06	0.103306	0.258323	0.278474	0.0201508	-0.266059	3599	0.0295368	FDR 5%	NAM_JL_27	δT
αT		5_198046813	5	198046813	4.5e-10	1.5e-06	0.103306	0.258323	0.278474	0.0201508	-0.266059	3600	0.029545	FDR 5%	NAM_JL_27	δT
αT		5_198046985	5	198046985	4.5e-10	1.5e-06	0.103306	0.258323	0.278474	0.0201508	-0.266059	3601	0.0295532	FDR 5%	NAM_JL_27	δT
αT		5_198046990	5	198046990	4.5e-10	1.5e-06	0.103306	0.258323	0.278474	0.0201508	-0.266059	3602	0.0295614	FDR 5%	NAM_JL_27	δT
αT		5_198047421	5	198047421	5.4e-09	1.38e-05	0.0909091	0.258323	0.275934	0.0176109	-0.25994	4764	0.0390979	FDR 5%	NAM_JL_27	δT
αT		5_198047459	5	198047459	1.3e-08	3e-05	0.0895317	0.258323	0.275045	0.0167215	-0.253455	5267	0.043226	FDR 5%	NAM_JL_27	δT
αT		5_198047478	5	198047478	1.3e-08	3e-05	0.0895317	0.258323	0.275045	0.0167215	-0.253455	5268	0.0432342	FDR 5%	NAM_JL_27	δT
αT		5_198047532	5	198047532	3.39e-07	0.000631182	0.0998623	0.258323	0.271744	0.013421	-0.214794	6548	0.0537391	FDR 5%	NAM_JL_27	δT
αT		5_198047618	5	198047618	5.4e-09	1.38e-05	0.0909091	0.258323	0.275934	0.0176109	-0.25994	4765	0.0391061	FDR 5%	NAM_JL_27	δT
αT		5_198047806	5	198047806	1.31e-06	0.00224208	0.0847107	0.258323	0.270386	0.0120632	-0.21982	7143	0.0586222	FDR 5%	NAM_JL_27	δT
αT		5_198048267	5	198048267	4.5e-10	1.5e-06	0.103306	0.258323	0.278474	0.0201508	-0.266059	3603	0.0295696	FDR 5%	NAM_JL_27	δT
αT		5_198048272	5	198048272	1.49e-08	3.41e-05	0.107438	0.258323	0.274903	0.0165794	-0.229216	5317	0.0436363	FDR 5%	NAM_JL_27	δT
αT		5_198048318	5	198048318	4.5e-10	1.5e-06	0.103306	0.258323	0.278474	0.0201508	-0.266059	3604	0.0295778	FDR 5%	NAM_JL_27	δT
αT		5_198048936	5	198048936	1.98e-09	5.79e-06	0.104683	0.258323	0.276959	0.0186356	-0.252242	4109	0.0337223	FDR 5%	NAM_JL_27	δT
αT		5_198048942	5	198048942	1.98e-09	5.79e-06	0.104683	0.258323	0.276959	0.0186356	-0.252242	4110	0.0337305	FDR 5%	NAM_JL_27	δT
αT		5_198049049	5	198049049	1.98e-09	5.79e-06	0.104683	0.258323	0.276959	0.0186356	-0.252242	4111	0.0337387	FDR 5%	NAM_JL_27	δT
αT		5_198049069	5	198049069	4.5e-10	1.5e-06	0.103306	0.258323	0.278474	0.0201508	-0.266059	3605	0.029586	FDR 5%	NAM_JL_27	δT
αT		5_198049188	5	198049188	4.5e-10	1.5e-06	0.103306	0.258323	0.278474	0.0201508	-0.266059	3606	0.0295942	FDR 5%	NAM_JL_27	δT
αT		5_198049204	5	198049204	1.98e-09	5.79e-06	0.104683	0.258323	0.276959	0.0186356	-0.252242	4112	0.0337469	FDR 5%	NAM_JL_27	δT
αT		5_198049209	5	198049209	1.98e-09	5.79e-06	0.104683	0.258323	0.276959	0.0186356	-0.252242	4113	0.0337552	FDR 5%	NAM_JL_27	δT
αT		5_198049230	5	198049230	4.5e-10	1.5e-06	0.103306	0.258323	0.278474	0.0201508	-0.266059	3607	0.0296024	FDR 5%	NAM_JL_27	δT
αT		5_198049232	5	198049232	4.5e-10	1.5e-06	0.103306	0.258323	0.278474	0.0201508	-0.266059	3608	0.0296107	FDR 5%	NAM_JL_27	δT
αT		5_198049240	5	198049240	4.5e-10	1.5e-06	0.103306	0.258323	0.278474	0.0201508	-0.266059	3609	0.0296189	FDR 5%	NAM_JL_27	δT
αT		5_198049317	5	198049317	2.29e-06	0.00375559	0.13843	0.258323	0.269831	0.011508	-0.168591	7436	0.0610268	FDR 5%	NAM_JL_27	δT
αT		5_198049433	5	198049433	1.98e-09	5.79e-06	0.104683	0.258323	0.276959	0.0186356	-0.252242	4114	0.0337634	FDR 5%	NAM_JL_27	δT
αT		5_198049482	5	198049482	4.5e-10	1.5e-06	0.103306	0.258323	0.278474	0.0201508	-0.266059	3610	0.0296271	FDR 5%	NAM_JL_27	δT
αT		5_198049661	5	198049661	1.89e-09	5.65e-06	0.104683	0.258323	0.277003	0.0186799	-0.253139	4084	0.0335172	FDR 5%	NAM_JL_27	δT
αT		5_198049762	5	198049762	4.5e-10	1.5e-06	0.103306	0.258323	0.278474	0.0201508	-0.266059	3611	0.0296353	FDR 5%	NAM_JL_27	δT
αT		5_198049786	5	198049786	4.5e-10	1.5e-06	0.103306	0.258323	0.278474	0.0201508	-0.266059	3612	0.0296435	FDR 5%	NAM_JL_27	δT
αT		5_198049822	5	198049822	6.94e-08	0.000143274	0.141185	0.258323	0.273343	0.0150201	-0.195033	5903	0.0484456	FDR 5%	NAM_JL_27	δT
αT		5_198049825	5	198049825	2.89e-10	1.02e-06	0.101928	0.258323	0.278927	0.0206042	-0.27132	3437	0.0282073	FDR 5%	NAM_JL_27	δT
αT		5_198049902	5	198049902	5.16e-09	1.32e-05	0.106749	0.258323	0.275981	0.0176575	-0.242884	4748	0.0389666	FDR 5%	NAM_JL_27	δT
αT		5_198049904	5	198049904	1.26e-09	3.92e-06	0.105372	0.258323	0.27742	0.0190968	-0.256135	3919	0.032163	FDR 5%	NAM_JL_27	δT
αT		5_198049993	5	198049993	5.16e-09	1.32e-05	0.106749	0.258323	0.275981	0.0176575	-0.242884	4749	0.0389748	FDR 5%	NAM_JL_27	δT
αT		5_198050071	5	198050071	3.15e-09	8.66e-06	0.103994	0.258323	0.276484	0.0181613	-0.249184	4427	0.0363321	FDR 5%	NAM_JL_27	δT
αT		5_198050076	5	198050076	3.15e-09	8.66e-06	0.103994	0.258323	0.276484	0.0181613	-0.249184	4428	0.0363403	FDR 5%	NAM_JL_27	δT
αT		5_198050083	5	198050083	7.31e-10	2.37e-06	0.102617	0.258323	0.277978	0.0196544	-0.262967	3762	0.0308745	FDR 5%	NAM_JL_27	δT
αT		5_198050260	5	198050260	1.26e-09	3.92e-06	0.105372	0.258323	0.27742	0.0190968	-0.256135	3920	0.0321712	FDR 5%	NAM_JL_27	δT
αT		5_198050268	5	198050268	5.16e-09	1.32e-05	0.106749	0.258323	0.275981	0.0176575	-0.242884	4750	0.038983	FDR 5%	NAM_JL_27	δT
αT		5_198050349	5	198050349	4.5e-10	1.5e-06	0.103306	0.258323	0.278474	0.0201508	-0.266059	3613	0.0296517	FDR 5%	NAM_JL_27	δT
αT		5_198050661	5	198050661	1.98e-09	5.79e-06	0.104683	0.258323	0.276959	0.0186356	-0.252242	4115	0.0337716	FDR 5%	NAM_JL_27	δT
αT		5_198050729	5	198050729	4.5e-10	1.5e-06	0.103306	0.258323	0.278474	0.0201508	-0.266059	3614	0.0296599	FDR 5%	NAM_JL_27	δT
αT		5_198050739	5	198050739	4.5e-10	1.5e-06	0.103306	0.258323	0.278474	0.0201508	-0.266059	3615	0.0296681	FDR 5%	NAM_JL_27	δT
αT		5_198065715	5	198065715	1.65e-09	5e-06	0.105372	0.258323	0.277141	0.0188181	-0.252265	4034	0.0331068	FDR 5%	NAM_JL_27	δT
αT		5_198065813	5	198065813	4.5e-10	1.5e-06	0.103306	0.258323	0.278474	0.0201508	-0.266059	3616	0.0296763	FDR 5%	NAM_JL_27	δT
αT		5_198065819	5	198065819	1.98e-09	5.79e-06	0.104683	0.258323	0.276959	0.0186356	-0.252242	4116	0.0337798	FDR 5%	NAM_JL_27	δT
αT		5_198065842	5	198065842	1.98e-09	5.79e-06	0.104683	0.258323	0.276959	0.0186356	-0.252242	4117	0.033788	FDR 5%	NAM_JL_27	δT
αT		5_198066014	5	198066014	4.5e-10	1.5e-06	0.103306	0.258323	0.278474	0.0201508	-0.266059	3617	0.0296845	FDR 5%	NAM_JL_27	δT
αT		5_198066055	5	198066055	4.5e-10	1.5e-06	0.103306	0.258323	0.278474	0.0201508	-0.266059	3618	0.0296927	FDR 5%	NAM_JL_27	δT
αT		5_198066165	5	198066165	3.37e-10	1.17e-06	0.0833333	0.258323	0.27877	0.0204466	-0.31191	3498	0.0287079	FDR 5%	NAM_JL_27	δT
αT		5_198066301	5	198066301	4.5e-10	1.5e-06	0.103306	0.258323	0.278474	0.0201508	-0.266059	3619	0.0297009	FDR 5%	NAM_JL_27	δT
αT		5_198066405	5	198066405	1.98e-09	5.79e-06	0.104683	0.258323	0.276959	0.0186356	-0.252242	4118	0.0337962	FDR 5%	NAM_JL_27	δT
αT		5_198066436	5	198066436	4.5e-10	1.5e-06	0.103306	0.258323	0.278474	0.0201508	-0.266059	3620	0.0297091	FDR 5%	NAM_JL_27	δT
αT		5_198066445	5	198066445	4.5e-10	1.5e-06	0.103306	0.258323	0.278474	0.0201508	-0.266059	3621	0.0297173	FDR 5%	NAM_JL_27	δT
αT		5_198066469	5	198066469	4.5e-10	1.5e-06	0.103306	0.258323	0.278474	0.0201508	-0.266059	3622	0.0297255	FDR 5%	NAM_JL_27	δT
αT		5_198066573	5	198066573	4.5e-10	1.5e-06	0.103306	0.258323	0.278474	0.0201508	-0.266059	3623	0.0297338	FDR 5%	NAM_JL_27	δT
αT		5_198066628	5	198066628	1.98e-09	5.79e-06	0.104683	0.258323	0.276959	0.0186356	-0.252242	4119	0.0338044	FDR 5%	NAM_JL_27	δT
αT		5_198066758	5	198066758	4.5e-10	1.5e-06	0.103306	0.258323	0.278474	0.0201508	-0.266059	3624	0.029742	FDR 5%	NAM_JL_27	δT
αT		5_198066802	5	198066802	4.5e-10	1.5e-06	0.103306	0.258323	0.278474	0.0201508	-0.266059	3625	0.0297502	FDR 5%	NAM_JL_27	δT
αT		5_198066803	5	198066803	4.5e-10	1.5e-06	0.103306	0.258323	0.278474	0.0201508	-0.266059	3626	0.0297584	FDR 5%	NAM_JL_27	δT
αT		5_198066879	5	198066879	4.5e-10	1.5e-06	0.103306	0.258323	0.278474	0.0201508	-0.266059	3627	0.0297666	FDR 5%	NAM_JL_27	δT
αT		5_198066924	5	198066924	1.98e-09	5.79e-06	0.104683	0.258323	0.276959	0.0186356	-0.252242	4120	0.0338126	FDR 5%	NAM_JL_27	δT
αT		5_198066944	5	198066944	3.79e-11	1.52e-07	0.0915978	0.258323	0.281018	0.0226952	-0.308227	3045	0.0249901	FDR 5%	NAM_JL_27	δT
αT		5_198066987	5	198066987	4.5e-10	1.5e-06	0.103306	0.258323	0.278474	0.0201508	-0.266059	3628	0.0297748	FDR 5%	NAM_JL_27	δT
αT		5_198067018	5	198067018	1.98e-09	5.79e-06	0.104683	0.258323	0.276959	0.0186356	-0.252242	4121	0.0338208	FDR 5%	NAM_JL_27	δT
αT		5_198067071	5	198067071	4.5e-10	1.5e-06	0.103306	0.258323	0.278474	0.0201508	-0.266059	3629	0.029783	FDR 5%	NAM_JL_27	δT
αT		5_198067107	5	198067107	3.89e-10	1.35e-06	0.104683	0.258323	0.278623	0.0203002	-0.263825	3524	0.0289213	FDR 5%	NAM_JL_27	δT
αT		5_198067121	5	198067121	4.5e-10	1.5e-06	0.103306	0.258323	0.278474	0.0201508	-0.266059	3630	0.0297912	FDR 5%	NAM_JL_27	δT
αT		5_198067122	5	198067122	1.98e-09	5.79e-06	0.104683	0.258323	0.276959	0.0186356	-0.252242	4122	0.033829	FDR 5%	NAM_JL_27	δT
αT		5_198067154	5	198067154	4.5e-10	1.5e-06	0.103306	0.258323	0.278474	0.0201508	-0.266059	3631	0.0297994	FDR 5%	NAM_JL_27	δT
αT		5_198067156	5	198067156	4.5e-10	1.5e-06	0.103306	0.258323	0.278474	0.0201508	-0.266059	3632	0.0298076	FDR 5%	NAM_JL_27	δT
αT		5_198067178	5	198067178	4.5e-10	1.5e-06	0.103306	0.258323	0.278474	0.0201508	-0.266059	3633	0.0298158	FDR 5%	NAM_JL_27	δT
αT		5_198067208	5	198067208	1.47e-09	4.54e-06	0.104683	0.258323	0.27726	0.0189371	-0.255883	3951	0.0324256	FDR 5%	NAM_JL_27	δT
αT		5_198067230	5	198067230	4.5e-10	1.5e-06	0.103306	0.258323	0.278474	0.0201508	-0.266059	3634	0.029824	FDR 5%	NAM_JL_27	δT
αT		5_198067243	5	198067243	1.98e-09	5.79e-06	0.104683	0.258323	0.276959	0.0186356	-0.252242	4123	0.0338372	FDR 5%	NAM_JL_27	δT
αT		5_198067252	5	198067252	1.98e-09	5.79e-06	0.104683	0.258323	0.276959	0.0186356	-0.252242	4124	0.0338454	FDR 5%	NAM_JL_27	δT
αT		5_198067253	5	198067253	1.98e-09	5.79e-06	0.104683	0.258323	0.276959	0.0186356	-0.252242	4125	0.0338536	FDR 5%	NAM_JL_27	δT
αT		5_198067290	5	198067290	1.98e-09	5.79e-06	0.104683	0.258323	0.276959	0.0186356	-0.252242	4126	0.0338618	FDR 5%	NAM_JL_27	δT
αT		5_198067346	5	198067346	4.5e-10	1.5e-06	0.103306	0.258323	0.278474	0.0201508	-0.266059	3635	0.0298322	FDR 5%	NAM_JL_27	δT
αT		5_198067349	5	198067349	3.41e-10	1.19e-06	0.106749	0.258323	0.278757	0.0204342	-0.260159	3501	0.0287325	FDR 5%	NAM_JL_27	δT
αT		5_198067424	5	198067424	1.76e-10	6.42e-07	0.102617	0.258323	0.279435	0.0211122	-0.273631	3347	0.0274686	FDR 5%	NAM_JL_27	δT
αT		5_198067434	5	198067434	2.89e-10	1.02e-06	0.101928	0.258323	0.278927	0.0206042	-0.27132	3438	0.0282155	FDR 5%	NAM_JL_27	δT
αT		5_198067457	5	198067457	4.5e-10	1.5e-06	0.103306	0.258323	0.278474	0.0201508	-0.266059	3636	0.0298404	FDR 5%	NAM_JL_27	δT
αT		5_198067536	5	198067536	1.98e-09	5.79e-06	0.104683	0.258323	0.276959	0.0186356	-0.252242	4127	0.0338701	FDR 5%	NAM_JL_27	δT
αT		5_198067713	5	198067713	3.97e-09	1.07e-05	0.107438	0.258323	0.276249	0.017926	-0.240177	4527	0.0371528	FDR 5%	NAM_JL_27	δT
αT		5_198067836	5	198067836	1.98e-09	5.79e-06	0.104683	0.258323	0.276959	0.0186356	-0.252242	4128	0.0338783	FDR 5%	NAM_JL_27	δT
αT		5_198068079	5	198068079	4.5e-10	1.5e-06	0.103306	0.258323	0.278474	0.0201508	-0.266059	3637	0.0298487	FDR 5%	NAM_JL_27	δT
αT		5_198068090	5	198068090	4.5e-10	1.5e-06	0.103306	0.258323	0.278474	0.0201508	-0.266059	3638	0.0298569	FDR 5%	NAM_JL_27	δT
αT		5_198068364	5	198068364	1.1e-08	2.58e-05	0.115702	0.258323	0.275214	0.0168903	-0.228061	5176	0.0424791	FDR 5%	NAM_JL_27	δT
αT		5_198068435	5	198068435	4.5e-10	1.5e-06	0.103306	0.258323	0.278474	0.0201508	-0.266059	3639	0.0298651	FDR 5%	NAM_JL_27	δT
αT		5_198068460	5	198068460	1.98e-09	5.79e-06	0.104683	0.258323	0.276959	0.0186356	-0.252242	4129	0.0338865	FDR 5%	NAM_JL_27	δT
αT		5_198068495	5	198068495	4.5e-10	1.5e-06	0.103306	0.258323	0.278474	0.0201508	-0.266059	3640	0.0298733	FDR 5%	NAM_JL_27	δT
αT		5_198068654	5	198068654	7.12e-09	1.75e-05	0.112259	0.258323	0.275653	0.0173297	-0.23364	4964	0.0407393	FDR 5%	NAM_JL_27	δT
αT		5_198068720	5	198068720	1.98e-09	5.79e-06	0.104683	0.258323	0.276959	0.0186356	-0.252242	4130	0.0338947	FDR 5%	NAM_JL_27	δT
αT		5_198068814	5	198068814	1.98e-09	5.79e-06	0.104683	0.258323	0.276959	0.0186356	-0.252242	4131	0.0339029	FDR 5%	NAM_JL_27	δT
αT		5_198069027	5	198069027	4.5e-10	1.5e-06	0.103306	0.258323	0.278474	0.0201508	-0.266059	3641	0.0298815	FDR 5%	NAM_JL_27	δT
αT		5_198069198	5	198069198	4.5e-10	1.5e-06	0.103306	0.258323	0.278474	0.0201508	-0.266059	3642	0.0298897	FDR 5%	NAM_JL_27	δT
αT		5_198069296	5	198069296	4.5e-10	1.5e-06	0.103306	0.258323	0.278474	0.0201508	-0.266059	3643	0.0298979	FDR 5%	NAM_JL_27	δT
αT		5_198069309	5	198069309	4.5e-10	1.5e-06	0.103306	0.258323	0.278474	0.0201508	-0.266059	3644	0.0299061	FDR 5%	NAM_JL_27	δT
αT		5_198069365	5	198069365	1.5e-06	0.002531	0.11708	0.258323	0.270256	0.011933	-0.187878	7208	0.0591556	FDR 5%	NAM_JL_27	δT
αT		5_198069418	5	198069418	1.98e-09	5.79e-06	0.104683	0.258323	0.276959	0.0186356	-0.252242	4132	0.0339111	FDR 5%	NAM_JL_27	δT
αT		5_198069590	5	198069590	4.5e-10	1.5e-06	0.103306	0.258323	0.278474	0.0201508	-0.266059	3645	0.0299143	FDR 5%	NAM_JL_27	δT
αT		5_198069811	5	198069811	6.29e-10	2.05e-06	0.102617	0.258323	0.27813	0.0198072	-0.265071	3732	0.0306283	FDR 5%	NAM_JL_27	δT
αT		5_198069845	5	198069845	7.74e-10	2.49e-06	0.108127	0.258323	0.277918	0.0195953	-0.254817	3783	0.0310469	FDR 5%	NAM_JL_27	δT
αT		5_198069851	5	198069851	1.98e-09	5.79e-06	0.104683	0.258323	0.276959	0.0186356	-0.252242	4133	0.0339193	FDR 5%	NAM_JL_27	δT
αT		5_198069894	5	198069894	1.26e-09	3.92e-06	0.10124	0.258323	0.27742	0.0190969	-0.260576	3918	0.0321548	FDR 5%	NAM_JL_27	δT
αT		5_198070031	5	198070031	2.89e-10	1.02e-06	0.101928	0.258323	0.278927	0.0206042	-0.27132	3439	0.0282237	FDR 5%	NAM_JL_27	δT
αT		5_198070044	5	198070044	4.5e-10	1.5e-06	0.103306	0.258323	0.278474	0.0201508	-0.266059	3646	0.0299225	FDR 5%	NAM_JL_27	δT
αT		5_198070176	5	198070176	1.98e-09	5.79e-06	0.104683	0.258323	0.276959	0.0186356	-0.252242	4134	0.0339275	FDR 5%	NAM_JL_27	δT
αT		5_198070263	5	198070263	1.98e-09	5.79e-06	0.104683	0.258323	0.276959	0.0186356	-0.252242	4135	0.0339357	FDR 5%	NAM_JL_27	δT
αT		5_198070281	5	198070281	1.2e-09	3.74e-06	0.108127	0.258323	0.277471	0.0191482	-0.251806	3904	0.0320399	FDR 5%	NAM_JL_27	δT
αT		5_198070307	5	198070307	2.01e-09	5.87e-06	0.107438	0.258323	0.276944	0.0186208	-0.247359	4168	0.0342065	FDR 5%	NAM_JL_27	δT
αT		5_198070415	5	198070415	1.08e-09	3.4e-06	0.101928	0.258323	0.277578	0.0192545	-0.26033	3867	0.0317362	FDR 5%	NAM_JL_27	δT
αT		5_198070489	5	198070489	1.76e-10	6.42e-07	0.102617	0.258323	0.279435	0.0211122	-0.273631	3348	0.0274768	FDR 5%	NAM_JL_27	δT
αT		5_198070550	5	198070550	4.5e-10	1.5e-06	0.103306	0.258323	0.278474	0.0201508	-0.266059	3647	0.0299307	FDR 5%	NAM_JL_27	δT
αT		5_198070573	5	198070573	4.5e-10	1.5e-06	0.103306	0.258323	0.278474	0.0201508	-0.266059	3648	0.0299389	FDR 5%	NAM_JL_27	δT
αT		5_198070593	5	198070593	2.35e-08	5.23e-05	0.0922865	0.258323	0.274438	0.0161152	-0.24457	5487	0.0450315	FDR 5%	NAM_JL_27	δT
αT		5_198070613	5	198070613	1.98e-09	5.79e-06	0.104683	0.258323	0.276959	0.0186356	-0.252242	4136	0.0339439	FDR 5%	NAM_JL_27	δT
αT		5_198070665	5	198070665	1.98e-09	5.79e-06	0.104683	0.258323	0.276959	0.0186356	-0.252242	4137	0.0339521	FDR 5%	NAM_JL_27	δT
αT		5_198070898	5	198070898	4.5e-10	1.5e-06	0.103306	0.258323	0.278474	0.0201508	-0.266059	3649	0.0299471	FDR 5%	NAM_JL_27	δT
αT		5_198080314	5	198080314	1.98e-09	5.79e-06	0.104683	0.258323	0.276959	0.0186356	-0.252242	4138	0.0339603	FDR 5%	NAM_JL_27	δT
αT		5_198080456	5	198080456	4.5e-10	1.5e-06	0.103306	0.258323	0.278474	0.0201508	-0.266059	3650	0.0299553	FDR 5%	NAM_JL_27	δT
αT		5_198080829	5	198080829	4.5e-10	1.5e-06	0.103306	0.258323	0.278474	0.0201508	-0.266059	3651	0.0299635	FDR 5%	NAM_JL_27	δT
αT		5_198080868	5	198080868	1.98e-09	5.79e-06	0.104683	0.258323	0.276959	0.0186356	-0.252242	4139	0.0339685	FDR 5%	NAM_JL_27	δT
αT		5_198081031	5	198081031	4.5e-10	1.5e-06	0.103306	0.258323	0.278474	0.0201508	-0.266059	3652	0.0299718	FDR 5%	NAM_JL_27	δT
αT		5_198081121	5	198081121	1.98e-09	5.79e-06	0.104683	0.258323	0.276959	0.0186356	-0.252242	4140	0.0339767	FDR 5%	NAM_JL_27	δT
αT		5_198081148	5	198081148	1.98e-09	5.79e-06	0.104683	0.258323	0.276959	0.0186356	-0.252242	4141	0.033985	FDR 5%	NAM_JL_27	δT
αT		5_198082752	5	198082752	1.98e-09	5.79e-06	0.104683	0.258323	0.276959	0.0186356	-0.252242	4142	0.0339932	FDR 5%	NAM_JL_27	δT
αT		5_198083304	5	198083304	1.98e-09	5.79e-06	0.104683	0.258323	0.276959	0.0186356	-0.252242	4143	0.0340014	FDR 5%	NAM_JL_27	δT
αT		5_198084226	5	198084226	4.5e-10	1.5e-06	0.103306	0.258323	0.278474	0.0201508	-0.266059	3653	0.02998	FDR 5%	NAM_JL_27	δT
αT		5_198085118	5	198085118	1.98e-09	5.79e-06	0.104683	0.258323	0.276959	0.0186356	-0.252242	4144	0.0340096	FDR 5%	NAM_JL_27	δT
αT		5_198085222	5	198085222	4.5e-10	1.5e-06	0.103306	0.258323	0.278474	0.0201508	-0.266059	3654	0.0299882	FDR 5%	NAM_JL_27	δT
αT		5_198085711	5	198085711	4.5e-10	1.5e-06	0.103306	0.258323	0.278474	0.0201508	-0.266059	3655	0.0299964	FDR 5%	NAM_JL_27	δT
αT		5_198085724	5	198085724	3.65e-10	1.27e-06	0.104683	0.258323	0.278689	0.0203661	-0.264545	3511	0.0288146	FDR 5%	NAM_JL_27	δT
αT		5_198085769	5	198085769	4.5e-10	1.5e-06	0.103306	0.258323	0.278474	0.0201508	-0.266059	3656	0.0300046	FDR 5%	NAM_JL_27	δT
αT		5_198114038	5	198114038	4.5e-10	1.5e-06	0.103306	0.258323	0.278474	0.0201508	-0.266059	3657	0.0300128	FDR 5%	NAM_JL_27	δT
αT		5_198114051	5	198114051	4.5e-10	1.5e-06	0.103306	0.258323	0.278474	0.0201508	-0.266059	3658	0.030021	FDR 5%	NAM_JL_27	δT
αT		5_198114105	5	198114105	4.5e-10	1.5e-06	0.103306	0.258323	0.278474	0.0201508	-0.266059	3659	0.0300292	FDR 5%	NAM_JL_27	δT
αT		5_198115050	5	198115050	4.5e-10	1.5e-06	0.103306	0.258323	0.278474	0.0201508	-0.266059	3660	0.0300374	FDR 5%	NAM_JL_27	δT
αT		5_198115074	5	198115074	4.5e-10	1.5e-06	0.103306	0.258323	0.278474	0.0201508	-0.266059	3661	0.0300456	FDR 5%	NAM_JL_27	δT
αT		5_198115089	5	198115089	4.5e-10	1.5e-06	0.103306	0.258323	0.278474	0.0201508	-0.266059	3662	0.0300538	FDR 5%	NAM_JL_27	δT
αT		5_198115090	5	198115090	1.98e-09	5.79e-06	0.104683	0.258323	0.276959	0.0186356	-0.252242	4145	0.0340178	FDR 5%	NAM_JL_27	δT
αT		5_198115122	5	198115122	6.86e-10	2.23e-06	0.102617	0.258323	0.278041	0.0197181	-0.258162	3750	0.030776	FDR 5%	NAM_JL_27	δT
αT		5_198115216	5	198115216	4.5e-10	1.5e-06	0.103306	0.258323	0.278474	0.0201508	-0.266059	3663	0.030062	FDR 5%	NAM_JL_27	δT
αT		5_198115247	5	198115247	2.96e-10	1.05e-06	0.103994	0.258323	0.278904	0.0205807	-0.267516	3445	0.0282729	FDR 5%	NAM_JL_27	δT
αT		5_198115260	5	198115260	7.58e-10	2.45e-06	0.103994	0.258323	0.27794	0.0196164	-0.261403	3771	0.0309484	FDR 5%	NAM_JL_27	δT
αT		5_198115497	5	198115497	4.5e-10	1.5e-06	0.103306	0.258323	0.278474	0.0201508	-0.266059	3664	0.0300702	FDR 5%	NAM_JL_27	δT
αT		5_198122448	5	198122448	3.21e-09	8.79e-06	0.105372	0.258323	0.276465	0.0181419	-0.247514	4441	0.036447	FDR 5%	NAM_JL_27	δT
αT		5_198122470	5	198122470	3.21e-09	8.79e-06	0.105372	0.258323	0.276465	0.0181419	-0.247514	4442	0.0364552	FDR 5%	NAM_JL_27	δT
αT		5_198122762	5	198122762	3.21e-09	8.79e-06	0.105372	0.258323	0.276465	0.0181419	-0.247514	4443	0.0364634	FDR 5%	NAM_JL_27	δT
αT		5_198122770	5	198122770	3.21e-09	8.79e-06	0.105372	0.258323	0.276465	0.0181419	-0.247514	4444	0.0364717	FDR 5%	NAM_JL_27	δT
αT		5_198122789	5	198122789	3.21e-09	8.79e-06	0.105372	0.258323	0.276465	0.0181419	-0.247514	4445	0.0364799	FDR 5%	NAM_JL_27	δT
αT		5_198122795	5	198122795	3.21e-09	8.79e-06	0.105372	0.258323	0.276465	0.0181419	-0.247514	4446	0.0364881	FDR 5%	NAM_JL_27	δT
αT		5_198122945	5	198122945	1.98e-09	5.79e-06	0.104683	0.258323	0.276959	0.0186356	-0.252242	4146	0.034026	FDR 5%	NAM_JL_27	δT
αT		5_198122986	5	198122986	1.98e-09	5.79e-06	0.104683	0.258323	0.276959	0.0186356	-0.252242	4147	0.0340342	FDR 5%	NAM_JL_27	δT
αT		5_198122987	5	198122987	1.98e-09	5.79e-06	0.104683	0.258323	0.276959	0.0186356	-0.252242	4148	0.0340424	FDR 5%	NAM_JL_27	δT
αT		5_198123023	5	198123023	5.44e-09	1.39e-05	0.102617	0.258323	0.275928	0.0176046	-0.244779	4768	0.0391307	FDR 5%	NAM_JL_27	δT
αT		5_198123129	5	198123129	3.07e-05	0.0357574	0.157713	0.258323	0.267261	0.00893781	-0.142284	10455	0.0858036	FDR 5%	NAM_JL_27	δT
αT		5_198123213	5	198123213	1.98e-09	5.79e-06	0.104683	0.258323	0.276959	0.0186356	-0.252242	4149	0.0340506	FDR 5%	NAM_JL_27	δT
αT		5_198123270	5	198123270	1.98e-09	5.79e-06	0.104683	0.258323	0.276959	0.0186356	-0.252242	4150	0.0340588	FDR 5%	NAM_JL_27	δT
αT		5_198123420	5	198123420	1.98e-09	5.79e-06	0.104683	0.258323	0.276959	0.0186356	-0.252242	4151	0.034067	FDR 5%	NAM_JL_27	δT
αT		5_198123421	5	198123421	1.98e-09	5.79e-06	0.104683	0.258323	0.276959	0.0186356	-0.252242	4152	0.0340752	FDR 5%	NAM_JL_27	δT
αT		5_198123525	5	198123525	1.98e-09	5.79e-06	0.104683	0.258323	0.276959	0.0186356	-0.252242	4153	0.0340834	FDR 5%	NAM_JL_27	δT
αT		5_198123610	5	198123610	2.29e-09	6.56e-06	0.103994	0.258323	0.276808	0.0184851	-0.252511	4255	0.0349205	FDR 5%	NAM_JL_27	δT
αT		5_198123636	5	198123636	1.98e-09	5.79e-06	0.104683	0.258323	0.276959	0.0186356	-0.252242	4154	0.0340916	FDR 5%	NAM_JL_27	δT
αT		5_198123801	5	198123801	1.98e-09	5.79e-06	0.104683	0.258323	0.276959	0.0186356	-0.252242	4155	0.0340998	FDR 5%	NAM_JL_27	δT
αT		5_198124067	5	198124067	1.98e-09	5.79e-06	0.104683	0.258323	0.276959	0.0186356	-0.252242	4156	0.0341081	FDR 5%	NAM_JL_27	δT
αT		5_198124083	5	198124083	1.98e-09	5.79e-06	0.104683	0.258323	0.276959	0.0186356	-0.252242	4157	0.0341163	FDR 5%	NAM_JL_27	δT
αT		5_198124097	5	198124097	1.98e-09	5.79e-06	0.104683	0.258323	0.276959	0.0186356	-0.252242	4158	0.0341245	FDR 5%	NAM_JL_27	δT
αT		5_198124444	5	198124444	1.98e-09	5.79e-06	0.104683	0.258323	0.276959	0.0186356	-0.252242	4159	0.0341327	FDR 5%	NAM_JL_27	δT
αT		5_198124499	5	198124499	1.98e-09	5.79e-06	0.104683	0.258323	0.276959	0.0186356	-0.252242	4160	0.0341409	FDR 5%	NAM_JL_27	δT
αT		5_198124515	5	198124515	1.98e-09	5.79e-06	0.104683	0.258323	0.276959	0.0186356	-0.252242	4161	0.0341491	FDR 5%	NAM_JL_27	δT
αT		5_198124728	5	198124728	4.5e-10	1.5e-06	0.103306	0.258323	0.278474	0.0201508	-0.266059	3665	0.0300784	FDR 5%	NAM_JL_27	δT
αT		5_198124760	5	198124760	1.98e-09	5.79e-06	0.104683	0.258323	0.276959	0.0186356	-0.252242	4162	0.0341573	FDR 5%	NAM_JL_27	δT
αT		5_198124799	5	198124799	1.98e-09	5.79e-06	0.104683	0.258323	0.276959	0.0186356	-0.252242	4163	0.0341655	FDR 5%	NAM_JL_27	δT
αT		5_198124811	5	198124811	1.98e-09	5.79e-06	0.104683	0.258323	0.276959	0.0186356	-0.252242	4164	0.0341737	FDR 5%	NAM_JL_27	δT
αT		5_198124822	5	198124822	4.5e-10	1.5e-06	0.103306	0.258323	0.278474	0.0201508	-0.266059	3666	0.0300867	FDR 5%	NAM_JL_27	δT
αT		5_198161075	5	198161075	6.16e-10	2.02e-06	0.103306	0.258323	0.278152	0.019829	-0.263782	3716	0.030497	FDR 5%	NAM_JL_27	δT
αT		5_198161103	5	198161103	6.16e-10	2.02e-06	0.103306	0.258323	0.278152	0.019829	-0.263782	3717	0.0305052	FDR 5%	NAM_JL_27	δT
αT		5_198161153	5	198161153	6.16e-10	2.02e-06	0.103306	0.258323	0.278152	0.019829	-0.263782	3718	0.0305134	FDR 5%	NAM_JL_27	δT
αT		5_198161357	5	198161357	6.16e-10	2.02e-06	0.103306	0.258323	0.278152	0.019829	-0.263782	3719	0.0305216	FDR 5%	NAM_JL_27	δT
αT		5_198161601	5	198161601	6.92e-10	2.25e-06	0.104683	0.258323	0.278034	0.0197105	-0.259622	3751	0.0307842	FDR 5%	NAM_JL_27	δT
αT		5_198161674	5	198161674	1.67e-09	5.05e-06	0.105372	0.258323	0.277129	0.0188062	-0.252426	4041	0.0331643	FDR 5%	NAM_JL_27	δT
αT		5_198161683	5	198161683	3.84e-10	1.33e-06	0.103994	0.258323	0.278638	0.0203146	-0.266038	3520	0.0288884	FDR 5%	NAM_JL_27	δT
αT		5_198161702	5	198161702	3.84e-10	1.33e-06	0.103994	0.258323	0.278638	0.0203146	-0.266038	3521	0.0288966	FDR 5%	NAM_JL_27	δT
αT		5_198161709	5	198161709	3.84e-10	1.33e-06	0.103994	0.258323	0.278638	0.0203146	-0.266038	3522	0.0289049	FDR 5%	NAM_JL_27	δT
αT		5_198161781	5	198161781	5.35e-10	1.77e-06	0.103306	0.258323	0.278297	0.019974	-0.265096	3690	0.0302836	FDR 5%	NAM_JL_27	δT
αT		5_198217239	5	198217239	2.65e-09	7.4e-06	0.104683	0.258323	0.276662	0.0183388	-0.250141	4349	0.035692	FDR 5%	NAM_JL_27	δT
αT		5_198217385	5	198217385	2.65e-09	7.4e-06	0.104683	0.258323	0.276662	0.0183388	-0.250141	4350	0.0357002	FDR 5%	NAM_JL_27	δT
αT		5_198217530	5	198217530	6.16e-10	2.02e-06	0.103306	0.258323	0.278152	0.019829	-0.263782	3720	0.0305298	FDR 5%	NAM_JL_27	δT
αT		5_198217891	5	198217891	2.65e-09	7.4e-06	0.104683	0.258323	0.276662	0.0183388	-0.250141	4351	0.0357084	FDR 5%	NAM_JL_27	δT
αT		5_198217929	5	198217929	6.16e-10	2.02e-06	0.103306	0.258323	0.278152	0.019829	-0.263782	3721	0.030538	FDR 5%	NAM_JL_27	δT
αT		5_198217968	5	198217968	6.16e-10	2.02e-06	0.103306	0.258323	0.278152	0.019829	-0.263782	3722	0.0305462	FDR 5%	NAM_JL_27	δT
αT		5_198218010	5	198218010	6.16e-10	2.02e-06	0.103306	0.258323	0.278152	0.019829	-0.263782	3723	0.0305544	FDR 5%	NAM_JL_27	δT
αT		5_198218041	5	198218041	2.65e-09	7.4e-06	0.104683	0.258323	0.276662	0.0183388	-0.250141	4352	0.0357166	FDR 5%	NAM_JL_27	δT
αT		5_198218102	5	198218102	2.65e-09	7.4e-06	0.104683	0.258323	0.276662	0.0183388	-0.250141	4353	0.0357248	FDR 5%	NAM_JL_27	δT
αT		5_198218125	5	198218125	2.65e-09	7.4e-06	0.104683	0.258323	0.276662	0.0183388	-0.250141	4354	0.035733	FDR 5%	NAM_JL_27	δT
αT		5_198218296	5	198218296	6.16e-10	2.02e-06	0.103306	0.258323	0.278152	0.019829	-0.263782	3724	0.0305627	FDR 5%	NAM_JL_27	δT
αT		5_198218373	5	198218373	2.65e-09	7.4e-06	0.104683	0.258323	0.276662	0.0183388	-0.250141	4355	0.0357412	FDR 5%	NAM_JL_27	δT
αT		5_198226641	5	198226641	5.7e-10	1.87e-06	0.104683	0.258323	0.278232	0.019909	-0.262218	3703	0.0303903	FDR 5%	NAM_JL_27	δT
αT		5_198226713	5	198226713	1.47e-09	4.54e-06	0.105372	0.258323	0.277259	0.018936	-0.253284	3952	0.0324338	FDR 5%	NAM_JL_27	δT
αT		5_198226714	5	198226714	2.81e-09	7.84e-06	0.103994	0.258323	0.276599	0.0182761	-0.250617	4371	0.0358725	FDR 5%	NAM_JL_27	δT
αT		5_198226771	5	198226771	4.91e-09	1.27e-05	0.106749	0.258323	0.276031	0.0177082	-0.242123	4727	0.0387942	FDR 5%	NAM_JL_27	δT
αT		5_198226864	5	198226864	1.47e-09	4.54e-06	0.105372	0.258323	0.277259	0.018936	-0.253284	3953	0.032442	FDR 5%	NAM_JL_27	δT
αT		5_198227189	5	198227189	3.36e-10	1.17e-06	0.103994	0.258323	0.278775	0.0204516	-0.266922	3485	0.0286012	FDR 5%	NAM_JL_27	δT
αT		5_198227247	5	198227247	3.36e-10	1.17e-06	0.103994	0.258323	0.278775	0.0204516	-0.266922	3486	0.0286094	FDR 5%	NAM_JL_27	δT
αT		5_198237294	5	198237294	9.3e-10	2.96e-06	0.106061	0.258323	0.277731	0.0194075	-0.257259	3820	0.0313505	FDR 5%	NAM_JL_27	δT
αT		5_198237573	5	198237573	9.3e-10	2.96e-06	0.106061	0.258323	0.277731	0.0194075	-0.257259	3821	0.0313587	FDR 5%	NAM_JL_27	δT
αT		5_198237581	5	198237581	3.81e-09	1.03e-05	0.107438	0.258323	0.276289	0.0179656	-0.244159	4520	0.0370954	FDR 5%	NAM_JL_27	δT
αT		5_198237606	5	198237606	9.3e-10	2.96e-06	0.106061	0.258323	0.277731	0.0194075	-0.257259	3822	0.0313669	FDR 5%	NAM_JL_27	δT
αT		5_198238023	5	198238023	9.3e-10	2.96e-06	0.106061	0.258323	0.277731	0.0194075	-0.257259	3823	0.0313751	FDR 5%	NAM_JL_27	δT
αT		5_198238054	5	198238054	9.3e-10	2.96e-06	0.106061	0.258323	0.277731	0.0194075	-0.257259	3824	0.0313834	FDR 5%	NAM_JL_27	δT
αT		5_198238098	5	198238098	3.81e-09	1.03e-05	0.107438	0.258323	0.276289	0.0179656	-0.244159	4521	0.0371036	FDR 5%	NAM_JL_27	δT
αT		5_198238220	5	198238220	3.81e-09	1.03e-05	0.107438	0.258323	0.276289	0.0179656	-0.244159	4522	0.0371118	FDR 5%	NAM_JL_27	δT
αT		5_198238310	5	198238310	9.3e-10	2.96e-06	0.106061	0.258323	0.277731	0.0194075	-0.257259	3825	0.0313916	FDR 5%	NAM_JL_27	δT
αT		5_198238333	5	198238333	9.3e-10	2.96e-06	0.106061	0.258323	0.277731	0.0194075	-0.257259	3826	0.0313998	FDR 5%	NAM_JL_27	δT
αT		5_198238502	5	198238502	3.79e-10	1.31e-06	0.107438	0.258323	0.278651	0.0203281	-0.258701	3515	0.0288474	FDR 5%	NAM_JL_27	δT
αT		5_198238547	5	198238547	3.36e-10	1.17e-06	0.103994	0.258323	0.278775	0.0204516	-0.266922	3487	0.0286176	FDR 5%	NAM_JL_27	δT
αT		5_198238549	5	198238549	1.47e-09	4.54e-06	0.105372	0.258323	0.277259	0.018936	-0.253284	3954	0.0324503	FDR 5%	NAM_JL_27	δT
αT		5_198238653	5	198238653	3.36e-10	1.17e-06	0.103994	0.258323	0.278775	0.0204516	-0.266922	3488	0.0286258	FDR 5%	NAM_JL_27	δT
αT		5_198238759	5	198238759	3.36e-10	1.17e-06	0.103994	0.258323	0.278775	0.0204516	-0.266922	3489	0.028634	FDR 5%	NAM_JL_27	δT
αT		5_198238769	5	198238769	1.31e-10	4.85e-07	0.103306	0.258323	0.279739	0.0214154	-0.274422	3299	0.0270747	FDR 5%	NAM_JL_27	δT
αT		5_198238803	5	198238803	2.54e-10	9.07e-07	0.101928	0.258323	0.279061	0.0207375	-0.272143	3411	0.0279939	FDR 5%	NAM_JL_27	δT
αT		5_198238973	5	198238973	3.36e-10	1.17e-06	0.103994	0.258323	0.278775	0.0204516	-0.266922	3490	0.0286422	FDR 5%	NAM_JL_27	δT
αT		5_198238981	5	198238981	3.36e-10	1.17e-06	0.103994	0.258323	0.278775	0.0204516	-0.266922	3491	0.0286504	FDR 5%	NAM_JL_27	δT
αT		5_198239381	5	198239381	3.36e-10	1.17e-06	0.103994	0.258323	0.278775	0.0204516	-0.266922	3492	0.0286586	FDR 5%	NAM_JL_27	δT
αT		5_198239460	5	198239460	1.54e-07	0.000301387	0.125344	0.258323	0.272537	0.0142141	-0.196221	6236	0.0511785	FDR 5%	NAM_JL_27	δT
αT		5_198239491	5	198239491	3.36e-10	1.17e-06	0.103994	0.258323	0.278775	0.0204516	-0.266922	3493	0.0286669	FDR 5%	NAM_JL_27	δT
αT		5_198239531	5	198239531	3.36e-10	1.17e-06	0.103994	0.258323	0.278775	0.0204516	-0.266922	3494	0.0286751	FDR 5%	NAM_JL_27	δT
αT		5_198239660	5	198239660	3.71e-09	1e-05	0.112948	0.258323	0.276316	0.0179925	-0.229806	4517	0.0370708	FDR 5%	NAM_JL_27	δT
αT		5_198239664	5	198239664	3.36e-10	1.17e-06	0.103994	0.258323	0.278775	0.0204516	-0.266922	3495	0.0286833	FDR 5%	NAM_JL_27	δT
αT		5_198239726	5	198239726	1.47e-09	4.54e-06	0.105372	0.258323	0.277259	0.018936	-0.253284	3955	0.0324585	FDR 5%	NAM_JL_27	δT
αT		5_198245092	5	198245092	3.36e-10	1.17e-06	0.103994	0.258323	0.278775	0.0204516	-0.266922	3496	0.0286915	FDR 5%	NAM_JL_27	δT
αT		5_198247926	5	198247926	1.59e-09	4.83e-06	0.107438	0.258323	0.277183	0.0188596	-0.253352	4006	0.032877	FDR 5%	NAM_JL_27	δT
αT		5_198260575	5	198260575	2.69e-08	5.91e-05	0.0936639	0.258323	0.274303	0.01598	-0.246177	5543	0.0454911	FDR 5%	NAM_JL_27	δT
αT		5_198260727	5	198260727	2.69e-08	5.91e-05	0.0936639	0.258323	0.274303	0.01598	-0.246177	5544	0.0454993	FDR 5%	NAM_JL_27	δT
αT		5_198262605	5	198262605	9.51e-09	2.27e-05	0.0668044	0.258323	0.275359	0.0170357	-0.319188	5101	0.0418636	FDR 5%	NAM_JL_27	δT
αT		5_198290279	5	198290279	6.24e-10	2.04e-06	0.0778237	0.258323	0.278139	0.0198157	-0.309963	3727	0.0305873	FDR 5%	NAM_JL_27	δT
αT		5_198292245	5	198292245	6.24e-10	2.04e-06	0.0778237	0.258323	0.278139	0.0198157	-0.309963	3728	0.0305955	FDR 5%	NAM_JL_27	δT
αT		5_198293518	5	198293518	6.24e-10	2.04e-06	0.0778237	0.258323	0.278139	0.0198157	-0.309963	3729	0.0306037	FDR 5%	NAM_JL_27	δT
αT		5_198320925	5	198320925	6.24e-10	2.04e-06	0.0778237	0.258323	0.278139	0.0198157	-0.309963	3730	0.0306119	FDR 5%	NAM_JL_27	δT
αT		5_198327977	5	198327977	5.44e-10	1.79e-06	0.0785124	0.258323	0.27828	0.0199573	-0.308917	3692	0.0303	FDR 5%	NAM_JL_27	δT
αT		5_198361764	5	198361764	4.23e-10	1.45e-06	0.077135	0.258323	0.278539	0.0202155	-0.31492	3544	0.0290854	FDR 5%	NAM_JL_27	δT
αT		5_198445552	5	198445552	2.09e-09	6.09e-06	0.0681818	0.258323	0.276904	0.0185805	-0.329519	4177	0.0342804	FDR 5%	NAM_JL_27	δT
αT		5_198464286	5	198464286	8.95e-09	2.15e-05	0.084022	0.258323	0.275421	0.0170975	-0.273089	5079	0.0416831	FDR 5%	NAM_JL_27	δT
αT		5_198465247	5	198465247	2.09e-09	6.09e-06	0.0681818	0.258323	0.276904	0.0185805	-0.329519	4178	0.0342886	FDR 5%	NAM_JL_27	δT
αT		5_198466908	5	198466908	3.56e-10	1.23e-06	0.0757576	0.258323	0.278715	0.0203923	-0.321384	3509	0.0287982	FDR 5%	NAM_JL_27	δT
αT		5_198467111	5	198467111	2.54e-10	9.07e-07	0.0764463	0.258323	0.27906	0.0207369	-0.321675	3412	0.0280021	FDR 5%	NAM_JL_27	δT
αT		5_198469015	5	198469015	2.54e-10	9.07e-07	0.0764463	0.258323	0.27906	0.0207369	-0.321675	3413	0.0280103	FDR 5%	NAM_JL_27	δT
αT		5_198472923	5	198472923	2.54e-10	9.07e-07	0.0764463	0.258323	0.27906	0.0207369	-0.321675	3414	0.0280185	FDR 5%	NAM_JL_27	δT
αT		5_198473845	5	198473845	1.98e-06	0.00327736	0.09573	0.258323	0.269978	0.0116552	-0.205872	7352	0.0603374	FDR 5%	NAM_JL_27	δT
αT		5_198476121	5	198476121	4.12e-10	1.42e-06	0.0778237	0.258323	0.278565	0.0202414	-0.309971	3539	0.0290444	FDR 5%	NAM_JL_27	δT
αT		5_198497268	5	198497268	1.66e-09	5.01e-06	0.0688705	0.258323	0.277138	0.0188146	-0.329076	4036	0.0331232	FDR 5%	NAM_JL_27	δT
αT		5_198498830	5	198498830	1.66e-09	5.01e-06	0.0688705	0.258323	0.277138	0.0188146	-0.329076	4037	0.0331314	FDR 5%	NAM_JL_27	δT
αT		5_198508240	5	198508240	2.72e-10	9.69e-07	0.0668044	0.258323	0.27899	0.0206668	-0.344179	3422	0.0280842	FDR 5%	NAM_JL_27	δT
αT		5_198514471	5	198514471	8.1e-06	0.0112917	0.332645	0.258323	0.268576	0.010253	-0.110192	8739	0.0717205	FDR 5%	NAM_JL_27	δT
αT		5_198515034	5	198515034	1.39e-09	4.31e-06	0.0702479	0.258323	0.277318	0.0189945	-0.322603	3939	0.0323271	FDR 5%	NAM_JL_27	δT
αT		5_198521779	5	198521779	1.47e-09	4.54e-06	0.0695592	0.258323	0.277259	0.0189355	-0.327092	3956	0.0324667	FDR 5%	NAM_JL_27	δT
αT		5_198555601	5	198555601	2.2e-09	6.38e-06	0.0668044	0.258323	0.276852	0.0185288	-0.333024	4195	0.0344281	FDR 5%	NAM_JL_27	δT
αT		5_198579857	5	198579857	1.66e-09	5.01e-06	0.0688705	0.258323	0.277138	0.0188146	-0.329076	4038	0.0331396	FDR 5%	NAM_JL_27	δT
αT		5_198584588	5	198584588	4.06e-09	1.09e-05	0.0695592	0.258323	0.276224	0.0179012	-0.318206	4536	0.0372267	FDR 5%	NAM_JL_27	δT
αT		5_198595727	5	198595727	1.47e-09	4.54e-06	0.0695592	0.258323	0.277259	0.0189355	-0.327092	3957	0.0324749	FDR 5%	NAM_JL_27	δT
αT		5_198596172	5	198596172	3.5e-09	9.49e-06	0.0688705	0.258323	0.276375	0.0180523	-0.316822	4497	0.0369066	FDR 5%	NAM_JL_27	δT
αT		5_198600104	5	198600104	2.31e-09	6.61e-06	0.0681818	0.258323	0.276801	0.0184776	-0.329015	4257	0.034937	FDR 5%	NAM_JL_27	δT
αT		5_198603975	5	198603975	2.31e-09	6.61e-06	0.0681818	0.258323	0.276801	0.0184776	-0.329015	4258	0.0349452	FDR 5%	NAM_JL_27	δT
αT		5_198669188	5	198669188	1.21e-09	3.78e-06	0.0695592	0.258323	0.277458	0.0191347	-0.324926	3909	0.0320809	FDR 5%	NAM_JL_27	δT
αT		5_198697374	5	198697374	2.71e-05	0.0321441	0.118457	0.258323	0.267384	0.00906086	-0.159659	10263	0.0842279	FDR 5%	NAM_JL_27	δT
αT		5_198725597	5	198725597	1.45e-07	0.000284365	0.327824	0.258323	0.2726	0.0142766	-0.12814	6212	0.0509815	FDR 5%	NAM_JL_27	δT
αT		5_198857535	5	198857535	8.82e-06	0.0121494	0.0757576	0.258323	0.268492	0.0101687	-0.201842	8844	0.0725822	FDR 5%	NAM_JL_27	δT
αT		5_198871179	5	198871179	1.11e-05	0.0149671	0.0736915	0.258323	0.26826	0.00993664	0.235936	9075	0.074478	FDR 5%	NAM_JL_27	δT
αT		5_198877042	5	198877042	2.82e-05	0.0333001	0.0964187	0.258323	0.267343	0.00902007	-0.183768	10326	0.0847449	FDR 5%	NAM_JL_27	δT
αT		5_198877045	5	198877045	1.71e-05	0.0217027	0.109504	0.258323	0.267835	0.0095116	-0.174328	9622	0.0789672	FDR 5%	NAM_JL_27	δT
αT		5_198903120	5	198903120	1.18e-05	0.0157416	0.108127	0.258323	0.268201	0.00987772	-0.17978	9158	0.0751592	FDR 5%	NAM_JL_27	δT
αT		5_198925822	5	198925822	1.7e-08	3.86e-05	0.0674931	0.258323	0.274767	0.0164439	-0.303158	5367	0.0440467	FDR 5%	NAM_JL_27	δT
αT		5_198940446	5	198940446	2.38e-05	0.0287832	0.139118	0.258323	0.267511	0.00918771	-0.149921	10076	0.0826932	FDR 5%	NAM_JL_27	δT
αT		5_198940520	5	198940520	1.45e-05	0.0189465	0.144628	0.258323	0.267998	0.00967467	-0.153045	9344	0.0766857	FDR 5%	NAM_JL_27	δT
αT		5_198949286	5	198949286	3.95e-05	0.0444432	0.40427	0.258323	0.267012	0.00868856	-0.096796	10840	0.0889633	FDR 5%	NAM_JL_27	δT
αT		5_198951715	5	198951715	4.24e-05	0.0471483	0.203857	0.258323	0.266943	0.00861966	-0.118993	10961	0.0899563	FDR 5%	NAM_JL_27	δT
αT		5_198951766	5	198951766	1.6e-05	0.0204657	0.203168	0.258323	0.267904	0.00958067	-0.125608	9514	0.0780809	FDR 5%	NAM_JL_27	δT
αT		5_198951848	5	198951848	5.84e-08	0.000121921	0.0929752	0.258323	0.273517	0.0151939	-0.243202	5841	0.0479368	FDR 5%	NAM_JL_27	δT
αT		5_198951913	5	198951913	2.03e-05	0.0251416	0.168733	0.258323	0.267667	0.00934379	-0.139169	9846	0.0808056	FDR 5%	NAM_JL_27	δT
αT		5_198951998	5	198951998	4.26e-08	9.09e-05	0.0853994	0.258323	0.273837	0.0155134	-0.257756	5715	0.0469027	FDR 5%	NAM_JL_27	δT
αT		5_199050925	5	199050925	6.52e-06	0.00933143	0.0626722	0.258323	0.268791	0.010468	-0.221569	8514	0.0698739	FDR 5%	NAM_JL_27	δT
αT		5_199060295	5	199060295	4.46e-05	0.0490649	0.223829	0.258323	0.266894	0.00857112	0.111549	11066	0.090818	FDR 5%	NAM_JL_27	δT
αT		5_199060298	5	199060298	4.46e-05	0.0490649	0.223829	0.258323	0.266894	0.00857112	0.111549	11067	0.0908262	FDR 5%	NAM_JL_27	δT
αT		5_199064116	5	199064116	5.19e-06	0.0076064	0.0943526	0.258323	0.269018	0.0106952	-0.194888	8308	0.0681833	FDR 5%	NAM_JL_27	δT
αT		5_199068142	5	199068142	2.82e-05	0.0332896	0.201791	0.258323	0.267344	0.00902066	0.112492	10323	0.0847203	FDR 5%	NAM_JL_27	δT
αT		5_199069300	5	199069300	3.04e-05	0.0354957	0.173554	0.258323	0.267269	0.00894625	0.12426	10442	0.0856969	FDR 5%	NAM_JL_27	δT
αT		5_199138294	5	199138294	6.72e-10	2.19e-06	0.0668044	0.258323	0.278063	0.0197398	-0.344749	3745	0.030735	FDR 5%	NAM_JL_27	δT
αT		5_199354860	5	199354860	2.22e-05	0.027077	0.0853994	0.258323	0.267581	0.00925815	-0.20005	9970	0.0818232	FDR 5%	NAM_JL_27	δT
αT		5_199354863	5	199354863	2.22e-05	0.027077	0.0853994	0.258323	0.267581	0.00925815	-0.20005	9971	0.0818314	FDR 5%	NAM_JL_27	δT
αT		5_199354914	5	199354914	2.22e-05	0.027077	0.0853994	0.258323	0.267581	0.00925815	-0.20005	9972	0.0818396	FDR 5%	NAM_JL_27	δT
αT		5_199378226	5	199378226	3.47e-07	0.000644116	0.131543	0.258323	0.271722	0.0133984	-0.166544	6562	0.053854	FDR 5%	NAM_JL_27	δT
αT		5_199378248	5	199378248	8.21e-07	0.00144542	0.120523	0.258323	0.270857	0.0125336	-0.168085	6924	0.0568249	FDR 5%	NAM_JL_27	δT
αT		5_199515800	5	199515800	7.54e-07	0.00133376	0.412534	0.258323	0.270942	0.0126188	0.116898	6892	0.0565623	FDR 5%	NAM_JL_27	δT
αT		5_199518604	5	199518604	1.25e-09	3.9e-06	0.0702479	0.258323	0.277425	0.0191017	-0.335686	3916	0.0321384	FDR 5%	NAM_JL_27	δT
αT		5_199518864	5	199518864	4.26e-05	0.0472869	0.353306	0.258323	0.266939	0.00861607	0.101495	10969	0.090022	FDR 5%	NAM_JL_27	δT
αT		5_199519026	5	199519026	2.4e-05	0.0290002	0.211433	0.258323	0.267501	0.00917803	0.130455	10096	0.0828573	FDR 5%	NAM_JL_27	δT
αT		5_199519570	5	199519570	3.25e-07	0.000606909	0.198347	0.258323	0.271786	0.0134627	0.165536	6533	0.053616	FDR 5%	NAM_JL_27	δT
αT		5_199519825	5	199519825	1.5e-05	0.0195438	0.25551	0.258323	0.267963	0.00963999	0.124387	9382	0.0769975	FDR 5%	NAM_JL_27	δT
αT		5_199520819	5	199520819	1.44e-05	0.0187738	0.259642	0.258323	0.268008	0.00968498	0.124193	9332	0.0765872	FDR 5%	NAM_JL_27	δT
αT		5_199520820	5	199520820	2.09e-05	0.025811	0.260331	0.258323	0.267637	0.00931369	0.121495	9888	0.0811503	FDR 5%	NAM_JL_27	δT
αT		5_199520921	5	199520921	9.22e-06	0.0126475	0.260331	0.258323	0.268447	0.0101243	0.12741	8885	0.0729187	FDR 5%	NAM_JL_27	δT
αT		5_199521135	5	199521135	3.98e-06	0.0061009	0.259642	0.258323	0.269281	0.0109582	0.132197	7950	0.0652452	FDR 5%	NAM_JL_27	δT
αT		5_199521243	5	199521243	2.1e-06	0.00346135	0.261019	0.258323	0.269918	0.0115948	0.134777	7396	0.0606986	FDR 5%	NAM_JL_27	δT
αT		5_199521945	5	199521945	2.87e-05	0.0338305	0.254132	0.258323	0.267325	0.00900214	0.121113	10351	0.0849501	FDR 5%	NAM_JL_27	δT
αT		5_199522036	5	199522036	1.97e-05	0.0245168	0.253444	0.258323	0.267696	0.00937302	0.123896	9802	0.0804445	FDR 5%	NAM_JL_27	δT
αT		5_199522059	5	199522059	2.5e-05	0.030071	0.252755	0.258323	0.267461	0.00913769	0.122592	10147	0.0832759	FDR 5%	NAM_JL_27	δT
αT		5_199522388	5	199522388	2.51e-05	0.0300874	0.25551	0.258323	0.26746	0.00913696	0.121629	10148	0.0832841	FDR 5%	NAM_JL_27	δT
αT		5_199522401	5	199522401	2.51e-05	0.0300874	0.25551	0.258323	0.26746	0.00913696	0.121629	10149	0.0832923	FDR 5%	NAM_JL_27	δT
αT		5_199522714	5	199522714	2.83e-05	0.0333486	0.256887	0.258323	0.267342	0.00901844	0.12052	10328	0.0847613	FDR 5%	NAM_JL_27	δT
αT		5_199522758	5	199522758	8.35e-06	0.0115969	0.257576	0.258323	0.268546	0.0102229	0.128075	8772	0.0719913	FDR 5%	NAM_JL_27	δT
αT		5_199522948	5	199522948	4.06e-05	0.0454647	0.25551	0.258323	0.266985	0.00866146	0.118372	10893	0.0893982	FDR 5%	NAM_JL_27	δT
αT		5_199522954	5	199522954	2.62e-05	0.0313102	0.254821	0.258323	0.267416	0.0090926	0.121568	10202	0.0837272	FDR 5%	NAM_JL_27	δT
αT		5_199524570	5	199524570	8.53e-06	0.0118218	0.437328	0.258323	0.268525	0.0102021	0.102838	8787	0.0721144	FDR 5%	NAM_JL_27	δT
αT		5_199532935	5	199532935	1e-05	0.0136209	0.369835	0.258323	0.268366	0.0100425	0.104779	8960	0.0735342	FDR 5%	NAM_JL_27	δT
αT		5_199533700	5	199533700	4.53e-05	0.0497805	0.378099	0.258323	0.266878	0.00855471	0.0970636	11092	0.0910314	FDR 5%	NAM_JL_27	δT
αT		5_199537760	5	199537760	3.65e-05	0.0414714	0.0860882	0.258323	0.267091	0.00876813	0.17507	10711	0.0879046	FDR 5%	NAM_JL_27	δT
αT		5_199537965	5	199537965	1.77e-06	0.00294799	0.0895317	0.258323	0.270091	0.0117678	-0.199437	7302	0.0599271	FDR 5%	NAM_JL_27	δT
αT		5_199537967	5	199537967	5.52e-08	0.000115849	0.0936639	0.258323	0.273574	0.0152513	-0.22798	5808	0.0476659	FDR 5%	NAM_JL_27	δT
αT		5_199538397	5	199538397	2.4e-05	0.0289377	0.0902204	0.258323	0.267504	0.00918107	0.17477	10090	0.0828081	FDR 5%	NAM_JL_27	δT
αT		5_199540139	5	199540139	2.79e-05	0.033032	0.0915978	0.258323	0.267353	0.00902978	0.170538	10306	0.0845808	FDR 5%	NAM_JL_27	δT
αT		5_199541193	5	199541193	9.79e-07	0.00170393	0.452479	0.258323	0.270681	0.0123581	0.116336	6999	0.0574404	FDR 5%	NAM_JL_27	δT
αT		5_199542385	5	199542385	5.58e-06	0.00813843	0.345041	0.258323	0.268945	0.0106218	-0.113644	8359	0.0686018	FDR 5%	NAM_JL_27	δT
αT		5_199542399	5	199542399	5.58e-06	0.00813843	0.345041	0.258323	0.268945	0.0106218	-0.113644	8360	0.06861	FDR 5%	NAM_JL_27	δT
αT		5_199542403	5	199542403	5.58e-06	0.00813843	0.345041	0.258323	0.268945	0.0106218	-0.113644	8361	0.0686183	FDR 5%	NAM_JL_27	δT
αT		5_199542492	5	199542492	1.67e-05	0.021184	0.347107	0.258323	0.267862	0.00953928	-0.107281	9585	0.0786635	FDR 5%	NAM_JL_27	δT
αT		5_199542730	5	199542730	2.99e-05	0.0349862	0.34573	0.258323	0.267286	0.00896274	-0.104094	10418	0.0854999	FDR 5%	NAM_JL_27	δT
αT		5_199545917	5	199545917	1.78e-05	0.0224367	0.106749	0.258323	0.267796	0.00947294	0.156074	9679	0.079435	FDR 5%	NAM_JL_27	δT
αT		5_199553212	5	199553212	4.28e-05	0.0474962	0.444904	0.258323	0.266934	0.00861084	-0.0965811	10979	0.090104	FDR 5%	NAM_JL_27	δT
αT		5_199553945	5	199553945	5.06e-06	0.00747865	0.415978	0.258323	0.269044	0.0107203	-0.105476	8239	0.067617	FDR 5%	NAM_JL_27	δT
αT		5_199554077	5	199554077	3.33e-05	0.0383628	0.402204	0.258323	0.267181	0.00885808	-0.0997734	10568	0.086731	FDR 5%	NAM_JL_27	δT
αT		5_199554207	5	199554207	4.09e-05	0.0457019	0.317493	0.258323	0.266978	0.00865501	-0.100693	10908	0.0895213	FDR 5%	NAM_JL_27	δT
αT		5_199569485	5	199569485	2.45e-05	0.0295047	0.0792011	0.258323	0.267481	0.00915807	0.162313	10130	0.0831363	FDR 5%	NAM_JL_27	δT
αT		5_199613663	5	199613663	1.55e-05	0.0200474	0.102617	0.258323	0.267935	0.00961213	0.160609	9408	0.0772109	FDR 5%	NAM_JL_27	δT
αT		5_199615285	5	199615285	1.84e-07	0.000356093	0.449725	0.258323	0.27236	0.014037	-0.121057	6292	0.0516381	FDR 5%	NAM_JL_27	δT
αT		5_199616855	5	199616855	3.38e-05	0.0388296	0.305096	0.258323	0.267167	0.0088439	-0.107734	10592	0.0869279	FDR 5%	NAM_JL_27	δT
αT		5_199617176	5	199617176	1.6e-05	0.020463	0.30854	0.258323	0.267904	0.00958091	-0.111383	9513	0.0780726	FDR 5%	NAM_JL_27	δT
αT		5_199619736	5	199619736	2.28e-05	0.0277669	0.486226	0.258323	0.267552	0.00922862	-0.100738	10020	0.0822336	FDR 5%	NAM_JL_27	δT
αT		5_199620505	5	199620505	1.51e-06	0.00254712	0.4573	0.258323	0.27025	0.0119264	-0.115546	7210	0.0591721	FDR 5%	NAM_JL_27	δT
αT		5_199620963	5	199620963	1.57e-05	0.0203042	0.44697	0.258323	0.267921	0.00959747	-0.105452	9428	0.0773751	FDR 5%	NAM_JL_27	δT
αT		5_199621397	5	199621397	2.6e-06	0.00420079	0.387052	0.258323	0.269704	0.0113813	-0.116071	7549	0.0619542	FDR 5%	NAM_JL_27	δT
αT		5_199621513	5	199621513	3.44e-05	0.0393756	0.358815	0.258323	0.267149	0.00882616	-0.0997977	10636	0.087289	FDR 5%	NAM_JL_27	δT
αT		5_199627538	5	199627538	3.95e-05	0.0443874	0.360193	0.258323	0.267013	0.00868989	-0.0991647	10839	0.0889551	FDR 5%	NAM_JL_27	δT
αT		5_199627548	5	199627548	7.76e-07	0.0013699	0.38292	0.258323	0.270914	0.0125907	-0.122484	6901	0.0566361	FDR 5%	NAM_JL_27	δT
αT		5_199627569	5	199627569	3.32e-06	0.00520761	0.379477	0.258323	0.269462	0.0111392	-0.115697	7765	0.0637269	FDR 5%	NAM_JL_27	δT
αT		5_199627590	5	199627590	1.2e-06	0.00205752	0.387052	0.258323	0.270478	0.012155	-0.120824	7100	0.0582693	FDR 5%	NAM_JL_27	δT
αT		5_199627620	5	199627620	1.2e-06	0.00205752	0.387052	0.258323	0.270478	0.012155	-0.120824	7101	0.0582775	FDR 5%	NAM_JL_27	δT
αT		5_199627724	5	199627724	2.3e-06	0.003768	0.379477	0.258323	0.269827	0.0115042	-0.117855	7440	0.0610597	FDR 5%	NAM_JL_27	δT
αT		5_199627788	5	199627788	1.67e-06	0.00280297	0.373278	0.258323	0.270145	0.0118222	-0.120066	7272	0.0596809	FDR 5%	NAM_JL_27	δT
αT		5_199627849	5	199627849	1.71e-06	0.00285884	0.37741	0.258323	0.270123	0.0118001	-0.119534	7290	0.0598286	FDR 5%	NAM_JL_27	δT
αT		5_199627907	5	199627907	1.56e-06	0.0026305	0.37259	0.258323	0.270213	0.0118901	-0.120507	7238	0.0594019	FDR 5%	NAM_JL_27	δT
αT		5_199627909	5	199627909	1.56e-06	0.0026305	0.37259	0.258323	0.270213	0.0118901	-0.120507	7239	0.0594101	FDR 5%	NAM_JL_27	δT
αT		5_199628009	5	199628009	1.56e-06	0.0026305	0.37259	0.258323	0.270213	0.0118901	-0.120507	7240	0.0594183	FDR 5%	NAM_JL_27	δT
αT		5_199628119	5	199628119	1.3e-06	0.00222469	0.37259	0.258323	0.270395	0.0120717	-0.121148	7138	0.0585812	FDR 5%	NAM_JL_27	δT
αT		5_199628164	5	199628164	2.16e-06	0.0035535	0.473829	0.258323	0.26989	0.0115665	-0.113209	7411	0.0608217	FDR 5%	NAM_JL_27	δT
αT		5_199628198	5	199628198	1.05e-06	0.00182156	0.371901	0.258323	0.27061	0.0122872	-0.122516	7027	0.0576702	FDR 5%	NAM_JL_27	δT
αT		5_199628219	5	199628219	1.06e-05	0.0143763	0.394628	0.258323	0.268306	0.0099825	-0.11074	9020	0.0740266	FDR 5%	NAM_JL_27	δT
αT		5_199628223	5	199628223	1.05e-06	0.00182156	0.371901	0.258323	0.27061	0.0122872	-0.122516	7028	0.0576784	FDR 5%	NAM_JL_27	δT
αT		5_199628285	5	199628285	3.03e-05	0.035408	0.347107	0.258323	0.267273	0.00894944	-0.101826	10434	0.0856312	FDR 5%	NAM_JL_27	δT
αT		5_199628397	5	199628397	8.19e-07	0.00144242	0.37259	0.258323	0.270859	0.012536	-0.123833	6922	0.0568085	FDR 5%	NAM_JL_27	δT
αT		5_199628841	5	199628841	1.2e-05	0.015909	0.473829	0.258323	0.26819	0.00986651	-0.105019	9165	0.0752166	FDR 5%	NAM_JL_27	δT
αT		5_199629006	5	199629006	9.68e-07	0.00168667	0.371901	0.258323	0.270692	0.0123687	-0.122256	6996	0.0574158	FDR 5%	NAM_JL_27	δT
αT		5_199629018	5	199629018	4.9e-06	0.00728807	0.476584	0.258323	0.269074	0.0107508	-0.109292	8199	0.0672887	FDR 5%	NAM_JL_27	δT
αT		5_199629162	5	199629162	4.43e-06	0.00668811	0.461433	0.258323	0.269175	0.010852	-0.110911	8066	0.0661972	FDR 5%	NAM_JL_27	δT
αT		5_199629182	5	199629182	4.43e-06	0.00668811	0.461433	0.258323	0.269175	0.010852	-0.110911	8067	0.0662054	FDR 5%	NAM_JL_27	δT
αT		5_199629245	5	199629245	4.43e-06	0.00668811	0.461433	0.258323	0.269175	0.010852	-0.110911	8068	0.0662136	FDR 5%	NAM_JL_27	δT
αT		5_199629263	5	199629263	4.43e-06	0.00668811	0.461433	0.258323	0.269175	0.010852	-0.110911	8069	0.0662218	FDR 5%	NAM_JL_27	δT
αT		5_199629286	5	199629286	4.43e-06	0.00668811	0.461433	0.258323	0.269175	0.010852	-0.110911	8070	0.06623	FDR 5%	NAM_JL_27	δT
αT		5_199647934	5	199647934	3.72e-06	0.00576551	0.389807	0.258323	0.269348	0.0110248	-0.115323	7868	0.0645722	FDR 5%	NAM_JL_27	δT
αT		5_199647937	5	199647937	3.57e-06	0.00555734	0.466253	0.258323	0.26939	0.0110666	-0.111014	7827	0.0642357	FDR 5%	NAM_JL_27	δT
αT		5_199648015	5	199648015	7.77e-06	0.0108873	0.461433	0.258323	0.268617	0.0102935	-0.107508	8700	0.0714004	FDR 5%	NAM_JL_27	δT
αT		5_199648034	5	199648034	7.77e-06	0.0108873	0.461433	0.258323	0.268617	0.0102935	-0.107508	8701	0.0714086	FDR 5%	NAM_JL_27	δT
αT		5_199648060	5	199648060	2.87e-06	0.00459061	0.46281	0.258323	0.269606	0.0112832	-0.11245	7620	0.0625369	FDR 5%	NAM_JL_27	δT
αT		5_199648256	5	199648256	2.87e-06	0.00459061	0.46281	0.258323	0.269606	0.0112832	-0.11245	7621	0.0625451	FDR 5%	NAM_JL_27	δT
αT		5_199648288	5	199648288	2.87e-06	0.00459061	0.46281	0.258323	0.269606	0.0112832	-0.11245	7622	0.0625533	FDR 5%	NAM_JL_27	δT
αT		5_199648308	5	199648308	4.67e-06	0.00700995	0.369146	0.258323	0.269123	0.0107996	-0.11402	8116	0.0666075	FDR 5%	NAM_JL_27	δT
αT		5_199648374	5	199648374	1.03e-05	0.0140106	0.462121	0.258323	0.268334	0.0100113	-0.105722	8990	0.0737804	FDR 5%	NAM_JL_27	δT
αT		5_199648579	5	199648579	1.58e-05	0.0203611	0.457989	0.258323	0.267912	0.0095891	-0.103451	9504	0.0779988	FDR 5%	NAM_JL_27	δT
αT		5_199648587	5	199648587	2.17e-05	0.0265765	0.364325	0.258323	0.267604	0.00928099	-0.106155	9927	0.0814703	FDR 5%	NAM_JL_27	δT
αT		5_199648818	5	199648818	1.3e-05	0.0171048	0.470386	0.258323	0.268111	0.00978764	-0.104126	9232	0.0757665	FDR 5%	NAM_JL_27	δT
αT		5_199649643	5	199649643	2.92e-06	0.00466451	0.467631	0.258323	0.269589	0.0112657	-0.112252	7635	0.06266	FDR 5%	NAM_JL_27	δT
αT		5_199649671	5	199649671	3.23e-09	8.85e-06	0.316804	0.258323	0.276458	0.0181348	-0.154251	4448	0.0365045	FDR 5%	NAM_JL_27	δT
αT		5_199649747	5	199649747	3.67e-05	0.0417392	0.201791	0.258323	0.267084	0.0087606	-0.121142	10726	0.0880277	FDR 5%	NAM_JL_27	δT
αT		5_199649759	5	199649759	3.74e-07	0.000692904	0.403581	0.258323	0.271645	0.0133223	-0.126521	6580	0.0540017	FDR 5%	NAM_JL_27	δT
αT		5_199649761	5	199649761	1.06e-06	0.00183779	0.371212	0.258323	0.270599	0.0122757	-0.122262	7046	0.0578261	FDR 5%	NAM_JL_27	δT
αT		5_199649779	5	199649779	1.59e-05	0.0204018	0.349862	0.258323	0.267908	0.00958449	-0.108748	9507	0.0780234	FDR 5%	NAM_JL_27	δT
αT		5_199649801	5	199649801	1.66e-05	0.0211429	0.349862	0.258323	0.267864	0.0095413	-0.108854	9584	0.0786553	FDR 5%	NAM_JL_27	δT
αT		5_199649809	5	199649809	6.48e-07	0.00115908	0.37259	0.258323	0.271094	0.0127706	-0.124979	6816	0.0559385	FDR 5%	NAM_JL_27	δT
αT		5_199650785	5	199650785	5.43e-08	0.000114043	0.231405	0.258323	0.273592	0.0152686	-0.146971	5800	0.0476003	FDR 5%	NAM_JL_27	δT
αT		5_199684183	5	199684183	8.81e-06	0.0121363	0.100551	0.258323	0.268493	0.0101698	0.174589	8841	0.0725576	FDR 5%	NAM_JL_27	δT
αT		5_199684417	5	199684417	8.81e-06	0.0121363	0.100551	0.258323	0.268493	0.0101698	0.174589	8842	0.0725658	FDR 5%	NAM_JL_27	δT
αT		5_199684498	5	199684498	8.81e-06	0.0121363	0.100551	0.258323	0.268493	0.0101698	0.174589	8843	0.072574	FDR 5%	NAM_JL_27	δT
αT		5_199685374	5	199685374	1.45e-09	4.47e-06	0.0716253	0.258323	0.277277	0.0189535	-0.330882	3946	0.0323846	FDR 5%	NAM_JL_27	δT
αT		5_199685701	5	199685701	1.44e-05	0.0187738	0.10124	0.258323	0.268008	0.00968501	0.169394	9331	0.076579	FDR 5%	NAM_JL_27	δT
αT		5_199686295	5	199686295	1.45e-09	4.47e-06	0.0716253	0.258323	0.277277	0.0189535	-0.330882	3947	0.0323928	FDR 5%	NAM_JL_27	δT
αT		5_199687004	5	199687004	2.2e-09	6.38e-06	0.0709366	0.258323	0.276851	0.0185283	-0.330934	4196	0.0344363	FDR 5%	NAM_JL_27	δT
αT		5_199688042	5	199688042	7.77e-07	0.00137111	0.0709366	0.258323	0.270913	0.0125897	-0.262776	6902	0.0566443	FDR 5%	NAM_JL_27	δT
αT		5_199690054	5	199690054	9.92e-08	0.000199402	0.0881543	0.258323	0.272983	0.0146595	-0.24425	6061	0.0497423	FDR 5%	NAM_JL_27	δT
αT		5_199690347	5	199690347	3.71e-08	8e-05	0.084022	0.258323	0.273977	0.0156542	-0.261712	5650	0.0463692	FDR 5%	NAM_JL_27	δT
αT		5_199692181	5	199692181	9.23e-08	0.00018674	0.0743802	0.258323	0.273055	0.0147319	-0.28263	6023	0.0494304	FDR 5%	NAM_JL_27	δT
αT		5_199693368	5	199693368	9.23e-08	0.00018674	0.0743802	0.258323	0.273055	0.0147319	-0.28263	6024	0.0494386	FDR 5%	NAM_JL_27	δT
αT		5_199694364	5	199694364	1.06e-05	0.0142734	0.0475207	0.258323	0.268313	0.00999028	-0.24202	9014	0.0739774	FDR 5%	NAM_JL_27	δT
αT		5_199696035	5	199696035	5.85e-06	0.00845723	0.483471	0.258323	0.268898	0.0105752	-0.106416	8432	0.0692009	FDR 5%	NAM_JL_27	δT
αT		5_199709917	5	199709917	2.88e-05	0.0338958	0.139118	0.258323	0.267323	0.00900005	0.153281	10353	0.0849665	FDR 5%	NAM_JL_27	δT
αT		5_199710950	5	199710950	1.15e-06	0.00198095	0.373278	0.258323	0.270519	0.012196	-0.119487	7079	0.0580969	FDR 5%	NAM_JL_27	δT
αT		5_199711030	5	199711030	7.3e-08	0.000150067	0.106061	0.258323	0.273293	0.0149697	-0.219358	5924	0.0486179	FDR 5%	NAM_JL_27	δT
αT		5_199711115	5	199711115	6.28e-09	1.56e-05	0.072314	0.258323	0.275781	0.0174581	-0.30941	4915	0.0403371	FDR 5%	NAM_JL_27	δT
αT		5_199711121	5	199711121	2.15e-05	0.0264067	0.393939	0.258323	0.267611	0.00928791	-0.103866	9921	0.0814211	FDR 5%	NAM_JL_27	δT
αT		5_199711135	5	199711135	6.45e-06	0.00924516	0.385675	0.258323	0.268802	0.010479	-0.110544	8499	0.0697508	FDR 5%	NAM_JL_27	δT
αT		5_199711380	5	199711380	2.25e-08	5.01e-05	0.072314	0.258323	0.274485	0.0161614	-0.302445	5463	0.0448345	FDR 5%	NAM_JL_27	δT
αT		5_199711390	5	199711390	2.27e-05	0.0275969	0.139807	0.258323	0.26756	0.00923654	0.157987	10001	0.0820776	FDR 5%	NAM_JL_27	δT
αT		5_199711396	5	199711396	3.56e-05	0.0406219	0.38843	0.258323	0.267116	0.0087925	-0.101535	10668	0.0875517	FDR 5%	NAM_JL_27	δT
αT		5_199711587	5	199711587	2.25e-08	5.01e-05	0.072314	0.258323	0.274485	0.0161614	-0.302445	5464	0.0448427	FDR 5%	NAM_JL_27	δT
αT		5_199712115	5	199712115	7.37e-10	2.39e-06	0.0950413	0.258323	0.277969	0.0196455	-0.275955	3763	0.0308827	FDR 5%	NAM_JL_27	δT
αT		5_199712119	5	199712119	1.27e-05	0.0168445	0.451791	0.258323	0.268128	0.00980462	-0.107869	9215	0.075627	FDR 5%	NAM_JL_27	δT
αT		5_199712151	5	199712151	2.25e-08	5.01e-05	0.072314	0.258323	0.274485	0.0161614	-0.302445	5465	0.0448509	FDR 5%	NAM_JL_27	δT
αT		5_199712267	5	199712267	6.4e-08	0.000132616	0.072314	0.258323	0.273425	0.0151022	-0.292017	5880	0.0482568	FDR 5%	NAM_JL_27	δT
αT		5_199712385	5	199712385	4.78e-07	0.00087207	0.238981	0.258323	0.271399	0.0130759	-0.135495	6682	0.0548388	FDR 5%	NAM_JL_27	δT
αT		5_199726703	5	199726703	6.54e-07	0.00116801	0.0743802	0.258323	0.271086	0.0127625	-0.259376	6819	0.0559631	FDR 5%	NAM_JL_27	δT
αT		5_199728065	5	199728065	2.82e-06	0.00451179	0.37741	0.258323	0.269626	0.011303	-0.11549	7603	0.0623974	FDR 5%	NAM_JL_27	δT
αT		5_199729308	5	199729308	4.98e-08	0.000105053	0.072314	0.258323	0.27368	0.0153564	-0.293058	5773	0.0473787	FDR 5%	NAM_JL_27	δT
αT		5_199729366	5	199729366	5.32e-08	0.000111962	0.0743802	0.258323	0.273612	0.0152886	-0.286305	5792	0.0475346	FDR 5%	NAM_JL_27	δT
αT		5_199729372	5	199729372	5.14e-09	1.32e-05	0.0984848	0.258323	0.275985	0.0176619	-0.253481	4747	0.0389584	FDR 5%	NAM_JL_27	δT
αT		5_199729631	5	199729631	1.72e-05	0.0217597	0.139807	0.258323	0.267831	0.00950809	0.159858	9631	0.0790411	FDR 5%	NAM_JL_27	δT
αT		5_199731291	5	199731291	2.58e-08	5.7e-05	0.0716253	0.258323	0.274344	0.0160213	-0.303459	5519	0.0452941	FDR 5%	NAM_JL_27	δT
αT		5_199731479	5	199731479	2.58e-08	5.7e-05	0.0716253	0.258323	0.274344	0.0160213	-0.303459	5520	0.0453023	FDR 5%	NAM_JL_27	δT
αT		5_199732029	5	199732029	2.96e-05	0.0347147	0.434573	0.258323	0.267295	0.00897168	-0.100842	10403	0.0853768	FDR 5%	NAM_JL_27	δT
αT		5_199732032	5	199732032	2.96e-05	0.0347147	0.434573	0.258323	0.267295	0.00897168	-0.100842	10404	0.085385	FDR 5%	NAM_JL_27	δT
αT		5_199732134	5	199732134	2.7e-05	0.0320479	0.430441	0.258323	0.267388	0.00906439	-0.102049	10257	0.0841786	FDR 5%	NAM_JL_27	δT
αT		5_199732184	5	199732184	3.77e-05	0.042655	0.432507	0.258323	0.26706	0.00873636	-0.10018	10758	0.0882903	FDR 5%	NAM_JL_27	δT
αT		5_199732204	5	199732204	1.94e-05	0.0242115	0.438017	0.258323	0.267711	0.0093874	-0.103589	9782	0.0802803	FDR 5%	NAM_JL_27	δT
αT		5_199732333	5	199732333	4.75e-09	1.23e-05	0.088843	0.258323	0.276065	0.0177415	-0.278462	4710	0.0386547	FDR 5%	NAM_JL_27	δT
αT		5_199732520	5	199732520	3.63e-08	7.83e-05	0.0895317	0.258323	0.274	0.0156767	-0.259032	5643	0.0463118	FDR 5%	NAM_JL_27	δT
αT		5_199732589	5	199732589	3.63e-08	7.83e-05	0.0895317	0.258323	0.274	0.0156767	-0.259032	5644	0.04632	FDR 5%	NAM_JL_27	δT
αT		5_199732632	5	199732632	3.63e-08	7.83e-05	0.0895317	0.258323	0.274	0.0156767	-0.259032	5645	0.0463282	FDR 5%	NAM_JL_27	δT
αT		5_199732717	5	199732717	3.63e-08	7.83e-05	0.0895317	0.258323	0.274	0.0156767	-0.259032	5646	0.0463364	FDR 5%	NAM_JL_27	δT
αT		5_199733772	5	199733772	5.37e-06	0.00785402	0.135675	0.258323	0.268983	0.0106601	0.171202	8336	0.0684131	FDR 5%	NAM_JL_27	δT
αT		5_199733808	5	199733808	8.65e-09	2.08e-05	0.0716253	0.258323	0.275455	0.0171318	-0.313753	5063	0.0415518	FDR 5%	NAM_JL_27	δT
αT		5_199756305	5	199756305	3.61e-06	0.00560987	0.135675	0.258323	0.269379	0.0110555	0.173578	7841	0.0643506	FDR 5%	NAM_JL_27	δT
αT		5_199758823	5	199758823	2.95e-09	8.17e-06	0.0895317	0.258323	0.276552	0.018229	-0.28068	4385	0.0359874	FDR 5%	NAM_JL_27	δT
αT		5_199759038	5	199759038	5.85e-09	1.47e-05	0.088843	0.258323	0.275853	0.0175302	-0.27376	4846	0.0397708	FDR 5%	NAM_JL_27	δT
αT		5_199759164	5	199759164	2.95e-09	8.17e-06	0.0895317	0.258323	0.276552	0.018229	-0.28068	4386	0.0359957	FDR 5%	NAM_JL_27	δT
αT		5_199759512	5	199759512	2.95e-09	8.17e-06	0.0895317	0.258323	0.276552	0.018229	-0.28068	4387	0.0360039	FDR 5%	NAM_JL_27	δT
αT		5_199759513	5	199759513	2.95e-09	8.17e-06	0.0895317	0.258323	0.276552	0.018229	-0.28068	4388	0.0360121	FDR 5%	NAM_JL_27	δT
αT		5_199759558	5	199759558	2.29e-08	5.09e-05	0.0902204	0.258323	0.274468	0.0161444	-0.261433	5469	0.0448838	FDR 5%	NAM_JL_27	δT
αT		5_199759563	5	199759563	2.29e-08	5.09e-05	0.0902204	0.258323	0.274468	0.0161444	-0.261433	5470	0.044892	FDR 5%	NAM_JL_27	δT
αT		5_199759584	5	199759584	4.53e-05	0.0497789	0.393251	0.258323	0.266878	0.00855517	-0.104967	11086	0.0909822	FDR 5%	NAM_JL_27	δT
αT		5_199759644	5	199759644	2.29e-08	5.09e-05	0.0902204	0.258323	0.274468	0.0161444	-0.261433	5471	0.0449002	FDR 5%	NAM_JL_27	δT
αT		5_199759667	5	199759667	3.15e-05	0.0365597	0.392562	0.258323	0.267236	0.00891307	-0.107446	10486	0.086058	FDR 5%	NAM_JL_27	δT
αT		5_199759771	5	199759771	3.74e-05	0.0424514	0.393939	0.258323	0.267065	0.00874206	-0.105916	10747	0.0882	FDR 5%	NAM_JL_27	δT
αT		5_199759799	5	199759799	4.53e-05	0.0497789	0.393251	0.258323	0.266878	0.00855517	-0.104967	11087	0.0909904	FDR 5%	NAM_JL_27	δT
αT		5_199759861	5	199759861	2.29e-08	5.09e-05	0.0902204	0.258323	0.274468	0.0161444	-0.261433	5472	0.0449084	FDR 5%	NAM_JL_27	δT
αT		5_199759994	5	199759994	3.56e-05	0.040679	0.471763	0.258323	0.267114	0.00879055	-0.10213	10673	0.0875927	FDR 5%	NAM_JL_27	δT
αT		5_199760105	5	199760105	2.95e-09	8.17e-06	0.0895317	0.258323	0.276552	0.018229	-0.28068	4389	0.0360203	FDR 5%	NAM_JL_27	δT
αT		5_199760605	5	199760605	2.95e-09	8.17e-06	0.0895317	0.258323	0.276552	0.018229	-0.28068	4390	0.0360285	FDR 5%	NAM_JL_27	δT
αT		5_199760606	5	199760606	5.85e-09	1.47e-05	0.088843	0.258323	0.275853	0.0175302	-0.27376	4847	0.0397791	FDR 5%	NAM_JL_27	δT
αT		5_199760856	5	199760856	2.95e-09	8.17e-06	0.0895317	0.258323	0.276552	0.018229	-0.28068	4391	0.0360367	FDR 5%	NAM_JL_27	δT
αT		5_199760873	5	199760873	2.95e-09	8.17e-06	0.0895317	0.258323	0.276552	0.018229	-0.28068	4392	0.0360449	FDR 5%	NAM_JL_27	δT
αT		5_199761095	5	199761095	5.57e-09	1.42e-05	0.0922865	0.258323	0.275902	0.0175793	-0.273978	4787	0.0392866	FDR 5%	NAM_JL_27	δT
αT		5_199761301	5	199761301	5.96e-06	0.00860566	0.383609	0.258323	0.26888	0.0105572	-0.11592	8438	0.0692502	FDR 5%	NAM_JL_27	δT
αT		5_199761330	5	199761330	7.89e-09	1.93e-05	0.107438	0.258323	0.275548	0.0172246	-0.232165	4995	0.0409937	FDR 5%	NAM_JL_27	δT
αT		5_199761483	5	199761483	4.84e-06	0.00723913	0.144628	0.258323	0.269087	0.0107634	0.166728	8151	0.0668948	FDR 5%	NAM_JL_27	δT
αT		5_199761573	5	199761573	7.97e-09	1.93e-05	0.0915978	0.258323	0.275539	0.0172154	-0.267045	4999	0.0410265	FDR 5%	NAM_JL_27	δT
αT		5_199761615	5	199761615	7.97e-09	1.93e-05	0.0915978	0.258323	0.275539	0.0172154	-0.267045	5000	0.0410347	FDR 5%	NAM_JL_27	δT
αT		5_199761701	5	199761701	5.22e-09	1.34e-05	0.0736915	0.258323	0.275969	0.0176459	-0.310987	4753	0.0390076	FDR 5%	NAM_JL_27	δT
αT		5_199761752	5	199761752	7.97e-09	1.93e-05	0.0915978	0.258323	0.275539	0.0172154	-0.267045	5001	0.0410429	FDR 5%	NAM_JL_27	δT
αT		5_199762774	5	199762774	2.95e-09	8.17e-06	0.0895317	0.258323	0.276552	0.018229	-0.28068	4393	0.0360531	FDR 5%	NAM_JL_27	δT
αT		5_199762955	5	199762955	7.63e-10	2.46e-06	0.088843	0.258323	0.277933	0.0196103	-0.292462	3779	0.031014	FDR 5%	NAM_JL_27	δT
αT		5_199763949	5	199763949	5.85e-09	1.47e-05	0.088843	0.258323	0.275853	0.0175302	-0.27376	4848	0.0397873	FDR 5%	NAM_JL_27	δT
αT		5_199764402	5	199764402	5.85e-09	1.47e-05	0.088843	0.258323	0.275853	0.0175302	-0.27376	4849	0.0397955	FDR 5%	NAM_JL_27	δT
αT		5_199765206	5	199765206	1.6e-08	3.64e-05	0.0895317	0.258323	0.274831	0.0165079	-0.261015	5344	0.0438579	FDR 5%	NAM_JL_27	δT
αT		5_199765662	5	199765662	7.63e-10	2.46e-06	0.088843	0.258323	0.277933	0.0196103	-0.292462	3780	0.0310222	FDR 5%	NAM_JL_27	δT
αT		5_199766245	5	199766245	7.96e-06	0.0111252	0.145317	0.258323	0.268593	0.0102696	0.161716	8723	0.0715892	FDR 5%	NAM_JL_27	δT
αT		5_199766369	5	199766369	1.86e-08	4.21e-05	0.0909091	0.258323	0.274676	0.0163525	-0.2557	5391	0.0442436	FDR 5%	NAM_JL_27	δT
αT		5_199766440	5	199766440	1.86e-08	4.21e-05	0.0909091	0.258323	0.274676	0.0163525	-0.2557	5392	0.0442518	FDR 5%	NAM_JL_27	δT
αT		5_199766469	5	199766469	1.86e-08	4.21e-05	0.0909091	0.258323	0.274676	0.0163525	-0.2557	5393	0.04426	FDR 5%	NAM_JL_27	δT
αT		5_199766563	5	199766563	3.46e-08	7.49e-05	0.0902204	0.258323	0.274048	0.0157253	-0.249447	5622	0.0461394	FDR 5%	NAM_JL_27	δT
αT		5_199766807	5	199766807	8.34e-09	2.01e-05	0.0902204	0.258323	0.275492	0.0171692	-0.267615	5051	0.0414533	FDR 5%	NAM_JL_27	δT
αT		5_199766905	5	199766905	2.05e-08	4.6e-05	0.0915978	0.258323	0.274578	0.0162548	-0.256804	5432	0.0445801	FDR 5%	NAM_JL_27	δT
αT		5_199766912	5	199766912	1.47e-10	5.39e-07	0.0915978	0.258323	0.279623	0.0213003	-0.297656	3322	0.0272635	FDR 5%	NAM_JL_27	δT
αT		5_199835796	5	199835796	7.41e-09	1.81e-05	0.0716253	0.258323	0.275613	0.0172895	-0.312795	4973	0.0408131	FDR 5%	NAM_JL_27	δT
αT		5_199835844	5	199835844	1.37e-06	0.00233955	0.103306	0.258323	0.270341	0.0120181	-0.200948	7161	0.0587699	FDR 5%	NAM_JL_27	δT
αT		5_199835847	5	199835847	6.5e-08	0.000134631	0.0895317	0.258323	0.273409	0.0150857	-0.245048	5887	0.0483143	FDR 5%	NAM_JL_27	δT
αT		5_199835848	5	199835848	3.82e-08	8.23e-05	0.108815	0.258323	0.273948	0.0156251	-0.225963	5654	0.0464021	FDR 5%	NAM_JL_27	δT
αT		5_199835958	5	199835958	8.86e-08	0.000179809	0.0895317	0.258323	0.273097	0.0147738	-0.244541	6002	0.0492581	FDR 5%	NAM_JL_27	δT
αT		5_199836395	5	199836395	3.09e-08	6.71e-05	0.088843	0.258323	0.274164	0.0158406	-0.256458	5596	0.0459261	FDR 5%	NAM_JL_27	δT
αT		5_199836763	5	199836763	1.17e-08	2.73e-05	0.0881543	0.258323	0.27515	0.016827	-0.268989	5213	0.0427828	FDR 5%	NAM_JL_27	δT
αT		5_199836978	5	199836978	1.17e-08	2.73e-05	0.0881543	0.258323	0.27515	0.016827	-0.268989	5214	0.042791	FDR 5%	NAM_JL_27	δT
αT		5_199837340	5	199837340	1.17e-08	2.73e-05	0.0881543	0.258323	0.27515	0.016827	-0.268989	5215	0.0427992	FDR 5%	NAM_JL_27	δT
αT		5_199837516	5	199837516	3.09e-08	6.71e-05	0.088843	0.258323	0.274164	0.0158406	-0.256458	5597	0.0459343	FDR 5%	NAM_JL_27	δT
αT		5_199838231	5	199838231	1.17e-08	2.73e-05	0.0881543	0.258323	0.27515	0.016827	-0.268989	5216	0.0428074	FDR 5%	NAM_JL_27	δT
αT		5_199838542	5	199838542	1.17e-08	2.73e-05	0.0881543	0.258323	0.27515	0.016827	-0.268989	5217	0.0428156	FDR 5%	NAM_JL_27	δT
αT		5_199839098	5	199839098	5.89e-09	1.48e-05	0.072314	0.258323	0.275846	0.0175231	-0.312497	4855	0.0398447	FDR 5%	NAM_JL_27	δT
αT		5_199839846	5	199839846	5.71e-08	0.000119502	0.0881543	0.258323	0.27354	0.0152166	-0.250044	5823	0.047789	FDR 5%	NAM_JL_27	δT
αT		5_199839911	5	199839911	5.71e-08	0.000119502	0.0881543	0.258323	0.27354	0.0152166	-0.250044	5824	0.0477972	FDR 5%	NAM_JL_27	δT
αT		5_199839999	5	199839999	5.71e-08	0.000119502	0.0881543	0.258323	0.27354	0.0152166	-0.250044	5825	0.0478054	FDR 5%	NAM_JL_27	δT
αT		5_199840435	5	199840435	5.71e-08	0.000119502	0.0881543	0.258323	0.27354	0.0152166	-0.250044	5826	0.0478136	FDR 5%	NAM_JL_27	δT
αT		5_199840800	5	199840800	5.71e-08	0.000119502	0.0881543	0.258323	0.27354	0.0152166	-0.250044	5827	0.0478219	FDR 5%	NAM_JL_27	δT
αT		5_199841038	5	199841038	3.09e-08	6.71e-05	0.088843	0.258323	0.274164	0.0158406	-0.256458	5598	0.0459425	FDR 5%	NAM_JL_27	δT
αT		5_199841725	5	199841725	3.09e-08	6.71e-05	0.088843	0.258323	0.274164	0.0158406	-0.256458	5599	0.0459507	FDR 5%	NAM_JL_27	δT
αT		5_199848848	5	199848848	2.23e-08	4.98e-05	0.0874656	0.258323	0.274491	0.0161677	-0.26227	5462	0.0448263	FDR 5%	NAM_JL_27	δT
αT		5_199853025	5	199853025	7.15e-08	0.000147257	0.0881543	0.258323	0.273313	0.01499	-0.249991	5917	0.0485605	FDR 5%	NAM_JL_27	δT
αT		5_199853039	5	199853039	3.93e-08	8.44e-05	0.088843	0.258323	0.273918	0.0155948	-0.256186	5677	0.0465908	FDR 5%	NAM_JL_27	δT
αT		5_199853095	5	199853095	3.53e-08	7.64e-05	0.108815	0.258323	0.274027	0.0157036	-0.227071	5631	0.0462133	FDR 5%	NAM_JL_27	δT
αT		5_199853098	5	199853098	3.93e-08	8.44e-05	0.088843	0.258323	0.273918	0.0155948	-0.256186	5678	0.046599	FDR 5%	NAM_JL_27	δT
αT		5_199853115	5	199853115	3.93e-08	8.44e-05	0.088843	0.258323	0.273918	0.0155948	-0.256186	5679	0.0466072	FDR 5%	NAM_JL_27	δT
αT		5_199853141	5	199853141	1.01e-06	0.00176081	0.152893	0.258323	0.270646	0.0123228	-0.167454	7016	0.0575799	FDR 5%	NAM_JL_27	δT
αT		5_199878390	5	199878390	4.97e-09	1.28e-05	0.0881543	0.258323	0.276019	0.0176963	-0.275478	4731	0.038827	FDR 5%	NAM_JL_27	δT
αT		5_199878424	5	199878424	4.97e-09	1.28e-05	0.0881543	0.258323	0.276019	0.0176963	-0.275478	4732	0.0388353	FDR 5%	NAM_JL_27	δT
αT		5_199878739	5	199878739	3.32e-09	9.03e-06	0.0874656	0.258323	0.27643	0.0181066	-0.280016	4480	0.0367671	FDR 5%	NAM_JL_27	δT
αT		5_199879443	5	199879443	7.34e-08	0.000150899	0.0785124	0.258323	0.273287	0.0149639	-0.269538	5925	0.0486261	FDR 5%	NAM_JL_27	δT
αT		5_199881319	5	199881319	4.22e-09	1.12e-05	0.165289	0.258323	0.276186	0.0178625	-0.196849	4605	0.037793	FDR 5%	NAM_JL_27	δT
αT		5_199881375	5	199881375	9.54e-10	3.03e-06	0.157713	0.258323	0.277704	0.0193812	-0.209372	3837	0.03149	FDR 5%	NAM_JL_27	δT
αT		5_199881391	5	199881391	9.02e-10	2.88e-06	0.163912	0.258323	0.277762	0.019439	-0.206805	3811	0.0312767	FDR 5%	NAM_JL_27	δT
αT		5_199881442	5	199881442	2.17e-06	0.00356511	0.240358	0.258323	0.269886	0.0115629	-0.131446	7414	0.0608463	FDR 5%	NAM_JL_27	δT
αT		5_199881511	5	199881511	9.02e-10	2.88e-06	0.163912	0.258323	0.277762	0.019439	-0.206805	3812	0.0312849	FDR 5%	NAM_JL_27	δT
αT		5_199881575	5	199881575	2.47e-10	8.85e-07	0.165978	0.258323	0.279088	0.0207652	-0.213616	3406	0.0279528	FDR 5%	NAM_JL_27	δT
αT		5_199881614	5	199881614	1.93e-09	5.77e-06	0.162534	0.258323	0.276982	0.0186585	-0.203735	4087	0.0335418	FDR 5%	NAM_JL_27	δT
αT		5_199881619	5	199881619	1.52e-09	4.65e-06	0.163223	0.258323	0.277231	0.0189076	-0.204793	3975	0.0326226	FDR 5%	NAM_JL_27	δT
αT		5_199881869	5	199881869	5.52e-09	1.41e-05	0.158402	0.258323	0.275912	0.0175893	-0.197748	4775	0.0391882	FDR 5%	NAM_JL_27	δT
αT		5_199882660	5	199882660	2.3e-05	0.0279443	0.360882	0.258323	0.267545	0.00922146	-0.104592	10029	0.0823074	FDR 5%	NAM_JL_27	δT
αT		5_199882737	5	199882737	4.55e-07	0.000833324	0.106061	0.258323	0.271448	0.0131249	-0.201436	6660	0.0546582	FDR 5%	NAM_JL_27	δT
αT		5_199882917	5	199882917	4.5e-05	0.049515	0.480028	0.258323	0.266884	0.0085613	-0.0938535	11076	0.0909001	FDR 5%	NAM_JL_27	δT
αT		5_199883323	5	199883323	2.46e-05	0.0295781	0.445592	0.258323	0.267478	0.00915513	-0.099207	10135	0.0831774	FDR 5%	NAM_JL_27	δT
αT		5_199883334	5	199883334	2.59e-05	0.030969	0.119146	0.258323	0.267428	0.00910494	-0.157198	10186	0.0835959	FDR 5%	NAM_JL_27	δT
αT		5_199883480	5	199883480	4.07e-07	0.000748624	0.103306	0.258323	0.271561	0.0132378	-0.202615	6625	0.054371	FDR 5%	NAM_JL_27	δT
αT		5_199883486	5	199883486	1.79e-07	0.000346558	0.102617	0.258323	0.272389	0.0140663	-0.210979	6280	0.0515396	FDR 5%	NAM_JL_27	δT
αT		5_199883561	5	199883561	3.99e-07	0.000735853	0.115014	0.258323	0.27158	0.0132572	-0.189305	6611	0.0542561	FDR 5%	NAM_JL_27	δT
αT		5_199883653	5	199883653	5.61e-08	0.000117644	0.100551	0.258323	0.273559	0.0152354	-0.223182	5810	0.0476823	FDR 5%	NAM_JL_27	δT
αT		5_199883662	5	199883662	2.92e-05	0.0342701	0.444215	0.258323	0.267311	0.00898791	-0.0982474	10367	0.0850814	FDR 5%	NAM_JL_27	δT
αT		5_199883743	5	199883743	1.29e-08	2.99e-05	0.101928	0.258323	0.27505	0.0167272	-0.231265	5256	0.0431357	FDR 5%	NAM_JL_27	δT
αT		5_199884987	5	199884987	3.46e-05	0.0395677	0.365014	0.258323	0.267144	0.00882064	-0.103162	10644	0.0873547	FDR 5%	NAM_JL_27	δT
αT		5_199884999	5	199884999	2.96e-05	0.0347147	0.446281	0.258323	0.267295	0.00897163	-0.0990353	10405	0.0853932	FDR 5%	NAM_JL_27	δT
αT		5_199885040	5	199885040	8.47e-07	0.00148885	0.106061	0.258323	0.270826	0.0125027	-0.193284	6933	0.0568987	FDR 5%	NAM_JL_27	δT
αT		5_199887979	5	199887979	3.22e-05	0.0373266	0.101928	0.258323	0.267213	0.00889004	-0.168791	10514	0.0862878	FDR 5%	NAM_JL_27	δT
αT		5_199888007	5	199888007	1.43e-05	0.0186412	0.100551	0.258323	0.268016	0.00969275	-0.179105	9324	0.0765215	FDR 5%	NAM_JL_27	δT
αT		5_199890238	5	199890238	5.2e-07	0.00094348	0.102617	0.258323	0.271314	0.0129911	-0.209146	6721	0.0551589	FDR 5%	NAM_JL_27	δT
αT		5_199891599	5	199891599	9.24e-06	0.0126693	0.190083	0.258323	0.268446	0.0101225	-0.138306	8886	0.0729269	FDR 5%	NAM_JL_27	δT
αT		5_199921152	5	199921152	1.88e-05	0.0234895	0.396006	0.258323	0.267745	0.0094214	-0.105078	9741	0.0799438	FDR 5%	NAM_JL_27	δT
αT		5_199943409	5	199943409	1.38e-09	4.28e-06	0.0730028	0.258323	0.277326	0.0190033	-0.317824	3934	0.0322861	FDR 5%	NAM_JL_27	δT
αT		5_199946378	5	199946378	6.68e-10	2.17e-06	0.0971074	0.258323	0.278069	0.019746	-0.267799	3741	0.0307022	FDR 5%	NAM_JL_27	δT
αT		5_199955719	5	199955719	1.73e-08	3.92e-05	0.117769	0.258323	0.27475	0.0164272	-0.214137	5375	0.0441123	FDR 5%	NAM_JL_27	δT
αT		5_199956259	5	199956259	1.5e-09	4.6e-06	0.184573	0.258323	0.277244	0.0189209	-0.192563	3960	0.0324995	FDR 5%	NAM_JL_27	δT
αT		5_199971936	5	199971936	1.02e-05	0.0137883	0.116391	0.258323	0.268352	0.010029	-0.17354	8973	0.0736409	FDR 5%	NAM_JL_27	δT
αT		5_199972126	5	199972126	7.61e-06	0.010678	0.431818	0.258323	0.268638	0.0103152	-0.106613	8680	0.0712363	FDR 5%	NAM_JL_27	δT
αT		5_199972329	5	199972329	1.34e-06	0.00228896	0.37741	0.258323	0.270365	0.0120414	-0.119286	7151	0.0586878	FDR 5%	NAM_JL_27	δT
αT		5_199973266	5	199973266	3.62e-05	0.0412507	0.208678	0.258323	0.267097	0.00877418	-0.121597	10704	0.0878471	FDR 5%	NAM_JL_27	δT
αT		5_199973366	5	199973366	6.82e-06	0.00971435	0.400826	0.258323	0.268746	0.0104231	-0.111162	8557	0.0702268	FDR 5%	NAM_JL_27	δT
αT		5_199973642	5	199973642	3.92e-05	0.0440767	0.116391	0.258323	0.267021	0.00869788	-0.159755	10827	0.0888566	FDR 5%	NAM_JL_27	δT
αT		5_199973864	5	199973864	2.16e-06	0.00355118	0.352617	0.258323	0.269891	0.0115673	-0.121776	7410	0.0608134	FDR 5%	NAM_JL_27	δT
αT		5_199978923	5	199978923	3.13e-07	0.000586127	0.365702	0.258323	0.271824	0.0135003	-0.128827	6516	0.0534764	FDR 5%	NAM_JL_27	δT
αT		5_199978930	5	199978930	2.86e-05	0.0337231	0.269972	0.258323	0.267329	0.00900555	-0.112579	10348	0.0849254	FDR 5%	NAM_JL_27	δT
αT		5_199979084	5	199979084	2.24e-06	0.00366878	0.11157	0.258323	0.269856	0.0115328	-0.190359	7425	0.0609366	FDR 5%	NAM_JL_27	δT
αT		5_199979088	5	199979088	7.54e-07	0.00133281	0.107438	0.258323	0.270943	0.0126197	-0.203689	6891	0.056554	FDR 5%	NAM_JL_27	δT
αT		5_199979145	5	199979145	2.15e-06	0.00354325	0.109504	0.258323	0.269893	0.0115698	-0.188145	7408	0.060797	FDR 5%	NAM_JL_27	δT
αT		5_199979146	5	199979146	2.83e-05	0.0334125	0.263774	0.258323	0.267339	0.0090161	-0.114693	10332	0.0847941	FDR 5%	NAM_JL_27	δT
αT		5_199979314	5	199979314	1.74e-06	0.00291233	0.147383	0.258323	0.270104	0.0117809	0.168238	7295	0.0598696	FDR 5%	NAM_JL_27	δT
αT		5_199979340	5	199979340	2.94e-05	0.0344546	0.15427	0.258323	0.267305	0.0089814	-0.143407	10380	0.0851881	FDR 5%	NAM_JL_27	δT
αT		5_199980314	5	199980314	5.96e-06	0.00860566	0.180441	0.258323	0.26888	0.0105573	-0.141274	8437	0.069242	FDR 5%	NAM_JL_27	δT
αT		5_199980355	5	199980355	7.21e-06	0.0101878	0.108127	0.258323	0.268691	0.0103678	-0.183462	8625	0.0707849	FDR 5%	NAM_JL_27	δT
αT		5_199980360	5	199980360	7.21e-06	0.0101878	0.108127	0.258323	0.268691	0.0103678	-0.183462	8626	0.0707931	FDR 5%	NAM_JL_27	δT
αT		5_199980362	5	199980362	7.21e-06	0.0101878	0.108127	0.258323	0.268691	0.0103678	-0.183462	8627	0.0708013	FDR 5%	NAM_JL_27	δT
αT		5_199980370	5	199980370	1.24e-06	0.00212838	0.183884	0.258323	0.270443	0.0121194	-0.153995	7113	0.058376	FDR 5%	NAM_JL_27	δT
αT		5_199980385	5	199980385	1.5e-05	0.0195346	0.216253	0.258323	0.267964	0.00964067	-0.127207	9380	0.0769811	FDR 5%	NAM_JL_27	δT
αT		5_199980409	5	199980409	3.56e-05	0.0406219	0.256198	0.258323	0.267116	0.0087925	-0.114493	10669	0.0875599	FDR 5%	NAM_JL_27	δT
αT		5_199981814	5	199981814	3.24e-05	0.0375623	0.476584	0.258323	0.267206	0.00888301	-0.0974887	10523	0.0863617	FDR 5%	NAM_JL_27	δT
αT		5_199981883	5	199981883	1.39e-07	0.000273204	0.0991736	0.258323	0.272643	0.0143201	-0.223454	6193	0.0508256	FDR 5%	NAM_JL_27	δT
αT		5_199982072	5	199982072	2.19e-08	4.89e-05	0.0764463	0.258323	0.274511	0.0161876	-0.283453	5455	0.0447689	FDR 5%	NAM_JL_27	δT
αT		5_200025447	5	200025447	1.8e-07	0.000348165	0.0853994	0.258323	0.272384	0.0140612	0.212873	6283	0.0515642	FDR 5%	NAM_JL_27	δT
αT		5_200030111	5	200030111	2.32e-07	0.000441273	0.129477	0.258323	0.272126	0.0138028	0.180682	6407	0.0525819	FDR 5%	NAM_JL_27	δT
αT		5_200033497	5	200033497	4.15e-10	1.43e-06	0.115702	0.258323	0.278556	0.0202329	-0.243375	3541	0.0290608	FDR 5%	NAM_JL_27	δT
αT		5_200033562	5	200033562	1.11e-10	4.13e-07	0.0764463	0.258323	0.279915	0.021592	-0.321518	3266	0.0268039	FDR 5%	NAM_JL_27	δT
αT		5_200033941	5	200033941	7.18e-07	0.00127381	0.245179	0.258323	0.270992	0.0126688	-0.137087	6865	0.0563407	FDR 5%	NAM_JL_27	δT
αT		5_200033951	5	200033951	4.27e-05	0.0473808	0.491047	0.258323	0.266937	0.00861358	-0.0961561	10975	0.0900712	FDR 5%	NAM_JL_27	δT
αT		5_200034109	5	200034109	2.72e-07	0.000514287	0.163912	0.258323	0.271965	0.0136415	-0.171526	6453	0.0529594	FDR 5%	NAM_JL_27	δT
αT		5_200034127	5	200034127	6.8e-06	0.00968649	0.480716	0.258323	0.26875	0.0104265	-0.105955	8552	0.0701858	FDR 5%	NAM_JL_27	δT
αT		5_200034329	5	200034329	3.62e-05	0.0412309	0.486226	0.258323	0.267098	0.00877484	-0.0971884	10701	0.0878225	FDR 5%	NAM_JL_27	δT
αT		5_200034607	5	200034607	4.64e-09	1.2e-05	0.114325	0.258323	0.276088	0.0177647	-0.23084	4704	0.0386055	FDR 5%	NAM_JL_27	δT
αT		5_200034758	5	200034758	5.48e-09	1.4e-05	0.110882	0.258323	0.27592	0.0175969	-0.226704	4773	0.0391717	FDR 5%	NAM_JL_27	δT
αT		5_200034762	5	200034762	3.17e-06	0.0050026	0.131543	0.258323	0.269506	0.0111833	-0.169181	7733	0.0634643	FDR 5%	NAM_JL_27	δT
αT		5_200034780	5	200034780	3.36e-09	9.14e-06	0.11157	0.258323	0.276417	0.0180938	-0.231658	4485	0.0368081	FDR 5%	NAM_JL_27	δT
αT		5_200035455	5	200035455	1.49e-07	0.000291892	0.181818	0.258323	0.272572	0.0142486	-0.161847	6222	0.0510636	FDR 5%	NAM_JL_27	δT
αT		5_200035617	5	200035617	2.27e-07	0.0004335	0.31405	0.258323	0.272147	0.013824	-0.133729	6386	0.0524095	FDR 5%	NAM_JL_27	δT
αT		5_200035654	5	200035654	2.08e-12	9.11e-09	0.0819559	0.258323	0.284022	0.0256988	-0.353754	2778	0.0227989	FDR 5%	NAM_JL_27	δT
αT		5_200036262	5	200036262	1.23e-12	5.48e-09	0.0833333	0.258323	0.284567	0.0262439	-0.352338	2733	0.0224296	FDR 5%	NAM_JL_27	δT
αT		5_200036437	5	200036437	4.2e-05	0.0467184	0.311983	0.258323	0.266953	0.00863	0.107382	10946	0.0898332	FDR 5%	NAM_JL_27	δT
αT		5_200036443	5	200036443	7.83e-06	0.0109518	0.405647	0.258323	0.26861	0.0102864	0.111349	8712	0.0714989	FDR 5%	NAM_JL_27	δT
αT		5_200036657	5	200036657	1.58e-12	6.98e-09	0.0826446	0.258323	0.284309	0.0259856	-0.352954	2750	0.0225691	FDR 5%	NAM_JL_27	δT
αT		5_200036719	5	200036719	1.58e-12	6.98e-09	0.0826446	0.258323	0.284309	0.0259856	-0.352954	2751	0.0225773	FDR 5%	NAM_JL_27	δT
αT		5_200037033	5	200037033	2.08e-12	9.11e-09	0.0819559	0.258323	0.284022	0.0256988	-0.353754	2779	0.0228071	FDR 5%	NAM_JL_27	δT
αT		5_200037440	5	200037440	2.08e-12	9.11e-09	0.0819559	0.258323	0.284022	0.0256988	-0.353754	2780	0.0228153	FDR 5%	NAM_JL_27	δT
αT		5_200037484	5	200037484	2.08e-12	9.11e-09	0.0819559	0.258323	0.284022	0.0256988	-0.353754	2781	0.0228235	FDR 5%	NAM_JL_27	δT
αT		5_200046880	5	200046880	1.58e-12	6.98e-09	0.0826446	0.258323	0.284309	0.0259856	-0.352954	2752	0.0225855	FDR 5%	NAM_JL_27	δT
αT		5_200047206	5	200047206	1.23e-12	5.48e-09	0.0833333	0.258323	0.284567	0.0262439	-0.352338	2734	0.0224378	FDR 5%	NAM_JL_27	δT
αT		5_200047576	5	200047576	1.23e-12	5.48e-09	0.0833333	0.258323	0.284567	0.0262439	-0.352338	2735	0.022446	FDR 5%	NAM_JL_27	δT
αT		5_200048189	5	200048189	4.92e-10	1.63e-06	0.146006	0.258323	0.278383	0.0200597	-0.222947	3681	0.0302098	FDR 5%	NAM_JL_27	δT
αT		5_200048357	5	200048357	8.14e-12	3.43e-08	0.084022	0.258323	0.282607	0.0242841	-0.337259	2890	0.0237181	FDR 5%	NAM_JL_27	δT
αT		5_200048397	5	200048397	8.14e-12	3.43e-08	0.084022	0.258323	0.282607	0.0242841	-0.337259	2891	0.0237263	FDR 5%	NAM_JL_27	δT
αT		5_200049031	5	200049031	7.07e-09	1.73e-05	0.206612	0.258323	0.275661	0.0173376	-0.174973	4962	0.0407229	FDR 5%	NAM_JL_27	δT
αT		5_200049133	5	200049133	6.44e-09	1.59e-05	0.205923	0.258323	0.275755	0.0174314	-0.175685	4926	0.0404274	FDR 5%	NAM_JL_27	δT
αT		5_200049187	5	200049187	7.14e-09	1.75e-05	0.2073	0.258323	0.27565	0.0173265	-0.174801	4965	0.0407475	FDR 5%	NAM_JL_27	δT
αT		5_200049268	5	200049268	6.44e-09	1.59e-05	0.205923	0.258323	0.275755	0.0174314	-0.175685	4927	0.0404356	FDR 5%	NAM_JL_27	δT
αT		5_200049386	5	200049386	6.92e-09	1.7e-05	0.322314	0.258323	0.275681	0.0173583	-0.148728	4954	0.0406572	FDR 5%	NAM_JL_27	δT
αT		5_200049444	5	200049444	9.63e-09	2.29e-05	0.2073	0.258323	0.275346	0.0170228	-0.172923	5113	0.0419621	FDR 5%	NAM_JL_27	δT
αT		5_200049600	5	200049600	4.73e-08	0.000100112	0.212121	0.258323	0.273731	0.0154083	-0.16191	5755	0.047231	FDR 5%	NAM_JL_27	δT
αT		5_200049972	5	200049972	1.44e-11	5.96e-08	0.128788	0.258323	0.282017	0.0236935	-0.253924	2946	0.0241777	FDR 5%	NAM_JL_27	δT
αT		5_200051050	5	200051050	1.44e-11	5.96e-08	0.128788	0.258323	0.282017	0.0236935	-0.253924	2947	0.0241859	FDR 5%	NAM_JL_27	δT
αT		5_200051181	5	200051181	1.22e-06	0.00209647	0.260331	0.258323	0.270459	0.0121354	-0.131067	7107	0.0583267	FDR 5%	NAM_JL_27	δT
αT		5_200051216	5	200051216	1.44e-11	5.96e-08	0.128788	0.258323	0.282017	0.0236935	-0.253924	2948	0.0241941	FDR 5%	NAM_JL_27	δT
αT		5_200051219	5	200051219	1.44e-11	5.96e-08	0.128788	0.258323	0.282017	0.0236935	-0.253924	2949	0.0242023	FDR 5%	NAM_JL_27	δT
αT		5_200051362	5	200051362	2.09e-06	0.00344065	0.261019	0.258323	0.269925	0.011602	-0.128231	7387	0.0606247	FDR 5%	NAM_JL_27	δT
αT		5_200051411	5	200051411	4.84e-11	1.91e-07	0.129477	0.258323	0.280766	0.0224427	-0.2464	3091	0.0253677	FDR 5%	NAM_JL_27	δT
αT		5_200051512	5	200051512	1.54e-06	0.00260257	0.261708	0.258323	0.270226	0.0119025	-0.129783	7227	0.0593116	FDR 5%	NAM_JL_27	δT
αT		5_200051659	5	200051659	3.43e-06	0.00536145	0.262397	0.258323	0.26943	0.0111065	-0.125106	7794	0.0639649	FDR 5%	NAM_JL_27	δT
αT		5_200051835	5	200051835	2.57e-06	0.00415958	0.263774	0.258323	0.269715	0.0113919	-0.126735	7543	0.061905	FDR 5%	NAM_JL_27	δT
αT		5_200051907	5	200051907	8.2e-12	3.45e-08	0.128788	0.258323	0.282599	0.0242763	-0.257209	2895	0.0237591	FDR 5%	NAM_JL_27	δT
αT		5_200052143	5	200052143	1.28e-11	5.3e-08	0.199725	0.258323	0.282143	0.0238196	-0.211326	2935	0.0240874	FDR 5%	NAM_JL_27	δT
αT		5_200052464	5	200052464	1.24e-11	5.16e-08	0.199036	0.258323	0.282171	0.0238479	-0.211877	2933	0.024071	FDR 5%	NAM_JL_27	δT
αT		5_200052930	5	200052930	1.5e-13	6.99e-10	0.219008	0.258323	0.286756	0.0284329	-0.225693	2620	0.0215022	FDR 5%	NAM_JL_27	δT
αT		5_200068853	5	200068853	7.61e-14	3.6e-10	0.236915	0.258323	0.287466	0.0291433	-0.21441	2576	0.0211411	FDR 5%	NAM_JL_27	δT
αT	αT_1	5_200069029	5	200069029	5.99e-15	3.04e-11	0.21281	0.258323	0.29013	0.0318065	-0.242074	2401	0.0197049	Top 0.2%, FDR 5%	NAM_JL_27	δT
αT		5_200069604	5	200069604	1.01e-11	4.23e-08	0.263774	0.258323	0.282382	0.0240591	-0.187159	2912	0.0238986	FDR 5%	NAM_JL_27	δT
αT		5_200070082	5	200070082	2.78e-12	1.21e-08	0.220386	0.258323	0.283719	0.0253961	-0.205929	2805	0.0230205	FDR 5%	NAM_JL_27	δT
αT		5_200070976	5	200070976	2.47e-12	1.07e-08	0.242424	0.258323	0.283844	0.0255213	-0.204651	2799	0.0229712	FDR 5%	NAM_JL_27	δT
αT		5_200071425	5	200071425	3.71e-12	1.6e-08	0.264463	0.258323	0.283423	0.0250996	-0.191307	2825	0.0231846	FDR 5%	NAM_JL_27	δT
αT		5_200071498	5	200071498	1e-11	4.2e-08	0.265152	0.258323	0.282391	0.0240679	-0.187266	2908	0.0238658	FDR 5%	NAM_JL_27	δT
αT		5_200071740	5	200071740	6.18e-11	2.4e-07	0.254132	0.258323	0.280514	0.0221905	-0.180225	3141	0.025778	FDR 5%	NAM_JL_27	δT
αT		5_200071810	5	200071810	2.5e-12	1.09e-08	0.258264	0.258323	0.283832	0.0255086	-0.194213	2801	0.0229876	FDR 5%	NAM_JL_27	δT
αT		5_200071987	5	200071987	2.45e-12	1.07e-08	0.234848	0.258323	0.283853	0.0255295	-0.207057	2797	0.0229548	FDR 5%	NAM_JL_27	δT
αT		5_200072005	5	200072005	6.98e-12	2.96e-08	0.257576	0.258323	0.282767	0.0244438	-0.190337	2876	0.0236032	FDR 5%	NAM_JL_27	δT
αT		5_200072185	5	200072185	5.59e-13	2.53e-09	0.23416	0.258323	0.285387	0.0270636	-0.211933	2692	0.0220931	FDR 5%	NAM_JL_27	δT
αT		5_200072458	5	200072458	5.69e-06	0.00827083	0.331956	0.258323	0.268926	0.0106025	-0.11365	8386	0.0688234	FDR 5%	NAM_JL_27	δT
αT		5_200072536	5	200072536	3.47e-12	1.5e-08	0.247245	0.258323	0.283491	0.0251682	-0.201891	2821	0.0231518	FDR 5%	NAM_JL_27	δT
αT		5_200072591	5	200072591	1.72e-12	7.6e-09	0.278926	0.258323	0.284217	0.0258942	-0.190224	2763	0.0226758	FDR 5%	NAM_JL_27	δT
αT		5_200072620	5	200072620	4.14e-12	1.78e-08	0.283747	0.258323	0.283308	0.0249848	-0.188107	2836	0.0232749	FDR 5%	NAM_JL_27	δT
αT		5_200072622	5	200072622	3.03e-07	0.000567389	0.289256	0.258323	0.271858	0.0135345	-0.129498	6506	0.0533944	FDR 5%	NAM_JL_27	δT
αT		5_200072632	5	200072632	8.07e-09	1.95e-05	0.287879	0.258323	0.275525	0.0172021	-0.156217	5033	0.0413055	FDR 5%	NAM_JL_27	δT
αT		5_200072639	5	200072639	3.65e-12	1.57e-08	0.262397	0.258323	0.283439	0.0251158	-0.190701	2824	0.0231764	FDR 5%	NAM_JL_27	δT
αT		5_200072682	5	200072682	5.47e-12	2.33e-08	0.268595	0.258323	0.283019	0.0246955	-0.189199	2860	0.0234719	FDR 5%	NAM_JL_27	δT
αT		5_200072697	5	200072697	2.28e-11	9.27e-08	0.287879	0.258323	0.281543	0.0232202	-0.176081	2997	0.0245962	FDR 5%	NAM_JL_27	δT
αT		5_200072700	5	200072700	4.14e-12	1.78e-08	0.284435	0.258323	0.283307	0.0249835	-0.191215	2837	0.0232831	FDR 5%	NAM_JL_27	δT
αT		5_200072705	5	200072705	4.43e-12	1.9e-08	0.254132	0.258323	0.283239	0.0249155	-0.198465	2844	0.0233405	FDR 5%	NAM_JL_27	δT
αT		5_200072727	5	200072727	3.1e-11	1.25e-07	0.267218	0.258323	0.281224	0.0229011	-0.180547	3029	0.0248588	FDR 5%	NAM_JL_27	δT
αT		5_200072730	5	200072730	2.6e-12	1.13e-08	0.267906	0.258323	0.283788	0.025465	-0.191059	2802	0.0229959	FDR 5%	NAM_JL_27	δT
αT		5_200072786	5	200072786	1.74e-11	7.12e-08	0.279614	0.258323	0.281824	0.023501	-0.182859	2971	0.0243828	FDR 5%	NAM_JL_27	δT
αT		5_200074180	5	200074180	2.26e-11	9.2e-08	0.261708	0.258323	0.281552	0.0232285	-0.182982	2995	0.0245798	FDR 5%	NAM_JL_27	δT
αT		5_200074206	5	200074206	4.03e-10	1.39e-06	0.267906	0.258323	0.278586	0.020263	-0.169506	3535	0.0290115	FDR 5%	NAM_JL_27	δT
αT		5_200074224	5	200074224	1.38e-10	5.08e-07	0.261708	0.258323	0.279687	0.0213642	-0.175192	3314	0.0271978	FDR 5%	NAM_JL_27	δT
αT		5_200074227	5	200074227	4.48e-10	1.5e-06	0.262397	0.258323	0.278478	0.020155	-0.168368	3555	0.0291757	FDR 5%	NAM_JL_27	δT
αT		5_200074305	5	200074305	1.7e-07	0.000331292	0.237603	0.258323	0.272438	0.0141147	-0.14181	6261	0.0513837	FDR 5%	NAM_JL_27	δT
αT		5_200074320	5	200074320	1.52e-10	5.58e-07	0.268595	0.258323	0.279585	0.0212622	-0.169196	3327	0.0273045	FDR 5%	NAM_JL_27	δT
αT		5_200074321	5	200074321	1.35e-06	0.00230194	0.301653	0.258323	0.270358	0.0120352	-0.125324	7155	0.0587207	FDR 5%	NAM_JL_27	δT
αT		5_200074362	5	200074362	7.06e-11	2.72e-07	0.280992	0.258323	0.280377	0.0220539	-0.17571	3162	0.0259504	FDR 5%	NAM_JL_27	δT
αT		5_200074364	5	200074364	4.15e-12	1.78e-08	0.285813	0.258323	0.283304	0.0249811	-0.186467	2840	0.0233077	FDR 5%	NAM_JL_27	δT
αT		5_200074372	5	200074372	6.84e-07	0.00121897	0.348485	0.258323	0.27104	0.0127173	-0.120317	6835	0.0560945	FDR 5%	NAM_JL_27	δT
αT		5_200074394	5	200074394	5.67e-13	2.57e-09	0.280992	0.258323	0.285372	0.027049	-0.194186	2693	0.0221013	FDR 5%	NAM_JL_27	δT
αT		5_200074486	5	200074486	2.33e-12	1.02e-08	0.269284	0.258323	0.283905	0.0255822	-0.191594	2790	0.0228974	FDR 5%	NAM_JL_27	δT
αT		5_200074487	5	200074487	1.05e-12	4.71e-09	0.273416	0.258323	0.28473	0.0264065	-0.193335	2724	0.0223557	FDR 5%	NAM_JL_27	δT
αT		5_200074489	5	200074489	5.67e-12	2.41e-08	0.294766	0.258323	0.282982	0.0246588	-0.177461	2861	0.0234801	FDR 5%	NAM_JL_27	δT
αT		5_200074491	5	200074491	3.1e-12	1.34e-08	0.2927	0.258323	0.283608	0.0252852	-0.183429	2812	0.0230779	FDR 5%	NAM_JL_27	δT
αT		5_200074516	5	200074516	1.73e-11	7.09e-08	0.278237	0.258323	0.281829	0.0235054	-0.180337	2970	0.0243746	FDR 5%	NAM_JL_27	δT
αT		5_200093989	5	200093989	1.26e-10	4.68e-07	0.28719	0.258323	0.279778	0.0214552	-0.170278	3289	0.0269926	FDR 5%	NAM_JL_27	δT
αT		5_200094174	5	200094174	5.11e-06	0.00753869	0.376033	0.258323	0.269033	0.01071	-0.108183	8251	0.0677155	FDR 5%	NAM_JL_27	δT
αT		5_200094268	5	200094268	1.39e-07	0.000272988	0.300964	0.258323	0.272644	0.014321	-0.137871	6192	0.0508174	FDR 5%	NAM_JL_27	δT
αT		5_200094279	5	200094279	4.38e-10	1.5e-06	0.28168	0.258323	0.278502	0.0201783	-0.170872	3553	0.0291593	FDR 5%	NAM_JL_27	δT
αT		5_200094316	5	200094316	4.45e-08	9.44e-05	0.256198	0.258323	0.273794	0.0154706	-0.150068	5736	0.047075	FDR 5%	NAM_JL_27	δT
αT		5_200094345	5	200094345	2.7e-09	7.54e-06	0.259642	0.258323	0.276643	0.0183195	-0.164038	4358	0.0357659	FDR 5%	NAM_JL_27	δT
αT		5_200094354	5	200094354	1.06e-10	3.95e-07	0.234848	0.258323	0.279963	0.0216402	-0.185686	3257	0.02673	FDR 5%	NAM_JL_27	δT
αT		5_200094438	5	200094438	7.74e-08	0.00015855	0.294077	0.258323	0.273233	0.01491	-0.139261	5948	0.0488149	FDR 5%	NAM_JL_27	δT
αT		5_200094484	5	200094484	4.35e-09	1.14e-05	0.320248	0.258323	0.276155	0.0178319	-0.145342	4623	0.0379407	FDR 5%	NAM_JL_27	δT
αT		5_200094500	5	200094500	2.94e-08	6.43e-05	0.295455	0.258323	0.274211	0.0158878	-0.147176	5578	0.0457783	FDR 5%	NAM_JL_27	δT
αT		5_200094554	5	200094554	3.56e-07	0.000660407	0.318182	0.258323	0.271695	0.0133717	-0.128739	6573	0.0539442	FDR 5%	NAM_JL_27	δT
αT		5_200094592	5	200094592	1.15e-07	0.000228428	0.30303	0.258323	0.272836	0.0145132	-0.134582	6116	0.0501937	FDR 5%	NAM_JL_27	δT
αT		5_200094632	5	200094632	3.7e-07	0.000684803	0.313361	0.258323	0.271658	0.0133344	-0.129591	6578	0.0539853	FDR 5%	NAM_JL_27	δT
αT		5_200094650	5	200094650	2.06e-08	4.62e-05	0.280992	0.258323	0.274574	0.0162509	-0.150202	5433	0.0445883	FDR 5%	NAM_JL_27	δT
αT		5_200094659	5	200094659	4.07e-11	1.62e-07	0.254821	0.258323	0.280945	0.0226219	-0.190872	3053	0.0250558	FDR 5%	NAM_JL_27	δT
αT		5_200094708	5	200094708	3.22e-10	1.13e-06	0.267906	0.258323	0.278816	0.0204932	-0.172773	3462	0.0284124	FDR 5%	NAM_JL_27	δT
αT		5_200094754	5	200094754	5.57e-10	1.83e-06	0.26584	0.258323	0.278255	0.0199321	-0.170455	3701	0.0303739	FDR 5%	NAM_JL_27	δT
αT		5_200094846	5	200094846	1.19e-10	4.44e-07	0.247934	0.258323	0.279837	0.0215134	-0.179897	3278	0.0269024	FDR 5%	NAM_JL_27	δT
αT		5_200094896	5	200094896	7.21e-11	2.77e-07	0.283747	0.258323	0.280356	0.022033	-0.172751	3168	0.0259996	FDR 5%	NAM_JL_27	δT
αT		5_200094917	5	200094917	2.24e-11	9.11e-08	0.267218	0.258323	0.281562	0.0232388	-0.184382	2994	0.0245716	FDR 5%	NAM_JL_27	δT
αT		5_200094939	5	200094939	1.46e-09	4.51e-06	0.297521	0.258323	0.277269	0.0189458	-0.154755	3948	0.032401	FDR 5%	NAM_JL_27	δT
αT		5_200094957	5	200094957	5.88e-09	1.48e-05	0.270661	0.258323	0.275847	0.017524	-0.157241	4854	0.0398365	FDR 5%	NAM_JL_27	δT
αT		5_200094978	5	200094978	1.09e-10	4.07e-07	0.268595	0.258323	0.279931	0.021608	-0.177398	3262	0.026771	FDR 5%	NAM_JL_27	δT
αT		5_200095178	5	200095178	9.56e-08	0.000192802	0.335399	0.258323	0.27302	0.0146966	-0.132518	6042	0.0495863	FDR 5%	NAM_JL_27	δT
αT		5_200095181	5	200095181	9.92e-10	3.14e-06	0.274793	0.258323	0.277664	0.0193408	-0.163869	3845	0.0315557	FDR 5%	NAM_JL_27	δT
αT		5_200095187	5	200095187	7.21e-11	2.77e-07	0.272039	0.258323	0.280356	0.0220332	-0.176424	3167	0.0259914	FDR 5%	NAM_JL_27	δT
αT		5_200095290	5	200095290	4.05e-13	1.85e-09	0.0867769	0.258323	0.285722	0.0273988	-0.319435	2672	0.021929	FDR 5%	NAM_JL_27	δT
αT		5_200096771	5	200096771	6.88e-09	1.69e-05	0.300275	0.258323	0.275688	0.0173652	-0.151444	4952	0.0406408	FDR 5%	NAM_JL_27	δT
αT		5_200096797	5	200096797	2.2e-08	4.91e-05	0.28719	0.258323	0.274508	0.0161846	-0.148471	5457	0.0447853	FDR 5%	NAM_JL_27	δT
αT		5_200097025	5	200097025	1.98e-08	4.46e-05	0.273416	0.258323	0.274613	0.0162902	-0.150611	5412	0.044416	FDR 5%	NAM_JL_27	δT
αT		5_200097058	5	200097058	1.96e-05	0.0244533	0.343664	0.258323	0.2677	0.00937689	-0.102171	9789	0.0803378	FDR 5%	NAM_JL_27	δT
αT		5_200097147	5	200097147	4.43e-07	0.000811292	0.273416	0.258323	0.271476	0.0131533	-0.133713	6650	0.0545762	FDR 5%	NAM_JL_27	δT
αT		5_200097180	5	200097180	3.1e-08	6.74e-05	0.274105	0.258323	0.27416	0.0158365	-0.148467	5601	0.0459671	FDR 5%	NAM_JL_27	δT
αT		5_200097223	5	200097223	2.81e-10	9.97e-07	0.280992	0.258323	0.278958	0.0206345	-0.170213	3434	0.0281826	FDR 5%	NAM_JL_27	δT
αT		5_200097635	5	200097635	4.53e-12	1.94e-08	0.249311	0.258323	0.283215	0.0248915	-0.195	2845	0.0233488	FDR 5%	NAM_JL_27	δT
αT		5_200097741	5	200097741	1.42e-09	4.38e-06	0.282369	0.258323	0.2773	0.018977	-0.157268	3943	0.03236	FDR 5%	NAM_JL_27	δT
αT		5_200098403	5	200098403	1.39e-09	4.31e-06	0.2927	0.258323	0.277318	0.0189945	-0.154221	3938	0.0323189	FDR 5%	NAM_JL_27	δT
αT		5_200098406	5	200098406	5.11e-12	2.18e-08	0.24449	0.258323	0.28309	0.0247663	-0.199186	2857	0.0234472	FDR 5%	NAM_JL_27	δT
αT		5_200098496	5	200098496	4.9e-09	1.26e-05	0.302342	0.258323	0.276034	0.017711	-0.153178	4725	0.0387778	FDR 5%	NAM_JL_27	δT
αT		5_200098521	5	200098521	7.7e-09	1.88e-05	0.272039	0.258323	0.275573	0.0172501	-0.154475	4987	0.040928	FDR 5%	NAM_JL_27	δT
αT		5_200098531	5	200098531	7.43e-09	1.82e-05	0.260331	0.258323	0.27561	0.0172864	-0.151081	4974	0.0408213	FDR 5%	NAM_JL_27	δT
αT		5_200098581	5	200098581	6.59e-09	1.63e-05	0.23416	0.258323	0.275731	0.0174079	-0.162288	4941	0.0405505	FDR 5%	NAM_JL_27	δT
αT		5_200098780	5	200098780	4.68e-08	9.91e-05	0.277548	0.258323	0.273741	0.0154183	-0.144762	5754	0.0472227	FDR 5%	NAM_JL_27	δT
αT		5_200098833	5	200098833	3.72e-05	0.0421763	0.393939	0.258323	0.267072	0.00874881	-0.0967561	10743	0.0881672	FDR 5%	NAM_JL_27	δT
αT		5_200098975	5	200098975	9.18e-08	0.000185826	0.316116	0.258323	0.27306	0.0147372	-0.130659	6022	0.0494222	FDR 5%	NAM_JL_27	δT
αT		5_200098983	5	200098983	1.12e-08	2.63e-05	0.306474	0.258323	0.275191	0.0168679	-0.142922	5186	0.0425612	FDR 5%	NAM_JL_27	δT
αT		5_200098995	5	200098995	1.89e-05	0.0236717	0.356061	0.258323	0.267736	0.00941307	-0.102458	9748	0.0800013	FDR 5%	NAM_JL_27	δT
αT		5_200099006	5	200099006	1.35e-08	3.11e-05	0.309917	0.258323	0.275004	0.0166808	-0.140586	5274	0.0432834	FDR 5%	NAM_JL_27	δT
αT		5_200099038	5	200099038	2.34e-10	8.39e-07	0.270661	0.258323	0.279144	0.0208211	-0.173803	3400	0.0279036	FDR 5%	NAM_JL_27	δT
αT		5_200099042	5	200099042	5.64e-09	1.43e-05	0.259642	0.258323	0.275889	0.0175663	-0.162563	4795	0.0393523	FDR 5%	NAM_JL_27	δT
αT		5_200099049	5	200099049	9.9e-09	2.36e-05	0.272727	0.258323	0.275318	0.0169946	-0.15813	5121	0.0420278	FDR 5%	NAM_JL_27	δT
αT		5_200099061	5	200099061	1.07e-07	0.000213548	0.303719	0.258323	0.272909	0.0145863	-0.143031	6084	0.049931	FDR 5%	NAM_JL_27	δT
αT		5_200099111	5	200099111	1.46e-09	4.51e-06	0.263085	0.258323	0.277269	0.0189453	-0.16812	3949	0.0324092	FDR 5%	NAM_JL_27	δT
αT		5_200099112	5	200099112	2.81e-09	7.84e-06	0.305785	0.258323	0.276599	0.0182761	-0.146501	4372	0.0358808	FDR 5%	NAM_JL_27	δT
αT		5_200099115	5	200099115	2.59e-09	7.26e-06	0.27686	0.258323	0.276685	0.018362	-0.159223	4339	0.0356099	FDR 5%	NAM_JL_27	δT
αT		5_200099134	5	200099134	3.32e-08	7.21e-05	0.288567	0.258323	0.274088	0.0157651	-0.140128	5615	0.046082	FDR 5%	NAM_JL_27	δT
αT		5_200099280	5	200099280	2.1e-07	0.000402629	0.288567	0.258323	0.272227	0.0139041	-0.135445	6350	0.0521141	FDR 5%	NAM_JL_27	δT
αT		5_200099330	5	200099330	8.24e-08	0.000168116	0.287879	0.258323	0.273169	0.0148463	-0.147165	5975	0.0490365	FDR 5%	NAM_JL_27	δT
αT		5_200099358	5	200099358	1.16e-06	0.00200093	0.364325	0.258323	0.270509	0.0121854	-0.11511	7083	0.0581298	FDR 5%	NAM_JL_27	δT
αT		5_200099406	5	200099406	4.23e-10	1.45e-06	0.254821	0.258323	0.278537	0.0202138	-0.177371	3546	0.0291018	FDR 5%	NAM_JL_27	δT
αT		5_200099537	5	200099537	2.08e-10	7.5e-07	0.272727	0.258323	0.279264	0.0209409	-0.172204	3384	0.0277723	FDR 5%	NAM_JL_27	δT
αT		5_200099538	5	200099538	1.92e-11	7.85e-08	0.251377	0.258323	0.281722	0.0233986	-0.192115	2978	0.0244403	FDR 5%	NAM_JL_27	δT
αT		5_200099559	5	200099559	6.67e-11	2.58e-07	0.251377	0.258323	0.280436	0.0221129	-0.186859	3151	0.0258601	FDR 5%	NAM_JL_27	δT
αT		5_200099598	5	200099598	8.91e-10	2.85e-06	0.25551	0.258323	0.277775	0.0194516	-0.172065	3808	0.031252	FDR 5%	NAM_JL_27	δT
αT		5_200099729	5	200099729	4.75e-10	1.58e-06	0.266529	0.258323	0.278418	0.0200945	-0.170969	3674	0.0301523	FDR 5%	NAM_JL_27	δT
αT		5_200099753	5	200099753	2.92e-11	1.18e-07	0.25	0.258323	0.281287	0.022964	-0.191207	3015	0.0247439	FDR 5%	NAM_JL_27	δT
αT		5_200099793	5	200099793	2.68e-08	5.9e-05	0.270661	0.258323	0.274306	0.0159823	-0.152539	5542	0.0454829	FDR 5%	NAM_JL_27	δT
αT		5_200099837	5	200099837	1.26e-10	4.66e-07	0.265152	0.258323	0.279782	0.0214591	-0.177267	3288	0.0269844	FDR 5%	NAM_JL_27	δT
αT		5_200099998	5	200099998	8.1e-08	0.00016537	0.316116	0.258323	0.273188	0.0148646	-0.136518	5965	0.0489544	FDR 5%	NAM_JL_27	δT
αT		5_200100040	5	200100040	2.5e-10	8.95e-07	0.289945	0.258323	0.279076	0.0207525	-0.163688	3408	0.0279693	FDR 5%	NAM_JL_27	δT
αT		5_200100065	5	200100065	9.05e-10	2.89e-06	0.258953	0.258323	0.277758	0.019435	-0.17033	3813	0.0312931	FDR 5%	NAM_JL_27	δT
αT		5_200100068	5	200100068	1.4e-10	5.14e-07	0.284435	0.258323	0.279672	0.021349	-0.170749	3318	0.0272306	FDR 5%	NAM_JL_27	δT
αT		5_200100134	5	200100134	6.1e-09	1.52e-05	0.28168	0.258323	0.275811	0.0174879	-0.153441	4896	0.0401812	FDR 5%	NAM_JL_27	δT
αT		5_200100482	5	200100482	3.31e-07	0.000615951	0.2927	0.258323	0.27177	0.0134469	-0.133012	6539	0.0536652	FDR 5%	NAM_JL_27	δT
αT		5_200100484	5	200100484	4.51e-08	9.57e-05	0.30303	0.258323	0.27378	0.0154568	-0.134615	5741	0.0471161	FDR 5%	NAM_JL_27	δT
αT		5_200100532	5	200100532	9.02e-12	3.79e-08	0.294766	0.258323	0.282501	0.024178	-0.177386	2902	0.0238165	FDR 5%	NAM_JL_27	δT
αT		5_200102778	5	200102778	1.05e-09	3.31e-06	0.274793	0.258323	0.277605	0.0192823	-0.163404	3864	0.0317116	FDR 5%	NAM_JL_27	δT
αT		5_200102793	5	200102793	4.01e-11	1.6e-07	0.247245	0.258323	0.280961	0.022638	-0.19083	3050	0.0250312	FDR 5%	NAM_JL_27	δT
αT		5_200108440	5	200108440	1.13e-12	5.05e-09	0.135675	0.258323	0.284654	0.0263308	-0.265242	2728	0.0223885	FDR 5%	NAM_JL_27	δT
αT		5_200109180	5	200109180	1.06e-07	0.000212482	0.280303	0.258323	0.272915	0.0145917	-0.13788	6083	0.0499228	FDR 5%	NAM_JL_27	δT
αT		5_200109206	5	200109206	5.09e-09	1.31e-05	0.258953	0.258323	0.275995	0.0176719	-0.162474	4740	0.0389009	FDR 5%	NAM_JL_27	δT
αT		5_200111203	5	200111203	1.17e-10	4.36e-07	0.278237	0.258323	0.279856	0.021533	-0.170682	3275	0.0268777	FDR 5%	NAM_JL_27	δT
αT		5_200111218	5	200111218	1.4e-08	3.22e-05	0.292011	0.258323	0.274967	0.0166439	-0.149037	5289	0.0434065	FDR 5%	NAM_JL_27	δT
αT		5_200111248	5	200111248	3.82e-08	8.23e-05	0.319559	0.258323	0.273948	0.0156246	-0.141194	5655	0.0464103	FDR 5%	NAM_JL_27	δT
αT		5_200111250	5	200111250	2.57e-10	9.17e-07	0.273416	0.258323	0.279048	0.0207251	-0.170985	3415	0.0280267	FDR 5%	NAM_JL_27	δT
αT		5_200111323	5	200111323	9.54e-09	2.28e-05	0.230028	0.258323	0.275355	0.0170322	-0.162746	5109	0.0419293	FDR 5%	NAM_JL_27	δT
αT		5_200112876	5	200112876	4.21e-09	1.12e-05	0.168044	0.258323	0.276187	0.0178638	-0.186638	4604	0.0377848	FDR 5%	NAM_JL_27	δT
αT		5_200112902	5	200112902	4.55e-07	0.000831961	0.309917	0.258323	0.27145	0.0131266	-0.132248	6659	0.05465	FDR 5%	NAM_JL_27	δT
αT		5_200112965	5	200112965	5.27e-06	0.00772307	0.355372	0.258323	0.269002	0.0106792	-0.11195	8316	0.0682489	FDR 5%	NAM_JL_27	δT
αT		5_200113024	5	200113024	4.15e-06	0.0063313	0.312672	0.258323	0.269239	0.0109156	-0.119843	7996	0.0656227	FDR 5%	NAM_JL_27	δT
αT		5_200113036	5	200113036	3.31e-07	0.000616091	0.320937	0.258323	0.27177	0.0134465	-0.129985	6540	0.0536734	FDR 5%	NAM_JL_27	δT
αT		5_200113049	5	200113049	9.52e-07	0.00165896	0.330579	0.258323	0.270709	0.0123859	-0.124724	6992	0.0573829	FDR 5%	NAM_JL_27	δT
αT		5_200113114	5	200113114	4.48e-13	2.04e-09	0.12259	0.258323	0.285618	0.0272953	-0.276276	2677	0.02197	FDR 5%	NAM_JL_27	δT
αT		5_200113281	5	200113281	1.23e-10	4.55e-07	0.269972	0.258323	0.279809	0.0214855	-0.174754	3285	0.0269598	FDR 5%	NAM_JL_27	δT
αT		5_200123331	5	200123331	4.1e-08	8.76e-05	0.188017	0.258323	0.273877	0.0155534	-0.155973	5696	0.0467467	FDR 5%	NAM_JL_27	δT
αT		5_200123374	5	200123374	1.16e-12	5.18e-09	0.128788	0.258323	0.284629	0.0263053	-0.263066	2729	0.0223967	FDR 5%	NAM_JL_27	δT
αT		5_200123403	5	200123403	3.39e-06	0.00530141	0.108815	0.258323	0.269442	0.011119	-0.156727	7784	0.0638828	FDR 5%	NAM_JL_27	δT
αT		5_200123462	5	200123462	6.24e-09	1.55e-05	0.150826	0.258323	0.275787	0.0174637	-0.185897	4904	0.0402468	FDR 5%	NAM_JL_27	δT
αT		5_200123525	5	200123525	4.26e-05	0.0473242	0.350551	0.258323	0.266938	0.0086152	-0.0975358	10970	0.0900302	FDR 5%	NAM_JL_27	δT
αT		5_200123563	5	200123563	3.53e-07	0.00065482	0.104683	0.258323	0.271704	0.0133806	-0.176027	6570	0.0539196	FDR 5%	NAM_JL_27	δT
αT		5_200124805	5	200124805	7.07e-07	0.00125653	0.223829	0.258323	0.271007	0.0126841	-0.137103	6854	0.0562504	FDR 5%	NAM_JL_27	δT
αT		5_200124806	5	200124806	5.71e-07	0.00102785	0.252755	0.258323	0.271222	0.0128988	-0.133848	6764	0.0555118	FDR 5%	NAM_JL_27	δT
αT		5_200124814	5	200124814	2.72e-06	0.0043806	0.309917	0.258323	0.269659	0.0113361	-0.117928	7575	0.0621676	FDR 5%	NAM_JL_27	δT
αT		5_200124916	5	200124916	2.16e-06	0.00354588	0.299587	0.258323	0.269892	0.011569	-0.116687	7409	0.0608052	FDR 5%	NAM_JL_27	δT
αT		5_200124930	5	200124930	9.42e-11	3.55e-07	0.18595	0.258323	0.28008	0.0217571	-0.198159	3238	0.0265741	FDR 5%	NAM_JL_27	δT
αT		5_200125089	5	200125089	1.79e-13	8.3e-10	0.14876	0.258323	0.286574	0.0282503	-0.251239	2627	0.0215596	FDR 5%	NAM_JL_27	δT
αT	αT_1	5_200125151	5	200125151	9.51e-17	5.28e-13	0.132231	0.258323	0.294494	0.0361709	-0.312885	2194	0.018006	Top 0.2%, FDR 5%	NAM_JL_27	δT
αT		5_200125175	5	200125175	2e-13	9.24e-10	0.152893	0.258323	0.286461	0.0281374	-0.247404	2631	0.0215925	FDR 5%	NAM_JL_27	δT
αT	αT_1	5_200125405	5	200125405	2.29e-16	1.24e-12	0.131543	0.258323	0.293567	0.0352437	-0.307286	2243	0.0184082	Top 0.2%, FDR 5%	NAM_JL_27	δT
αT		5_200127544	5	200127544	8.35e-10	2.68e-06	0.170799	0.258323	0.27784	0.0195172	-0.186164	3795	0.0311453	FDR 5%	NAM_JL_27	δT
αT		5_200127655	5	200127655	1.39e-12	6.18e-09	0.15427	0.258323	0.28444	0.0261166	-0.237641	2740	0.022487	FDR 5%	NAM_JL_27	δT
αT		5_200127875	5	200127875	5.34e-07	0.000965547	0.245179	0.258323	0.271288	0.0129646	-0.132502	6743	0.0553394	FDR 5%	NAM_JL_27	δT
αT		5_200129360	5	200129360	1.22e-07	0.000242832	0.27135	0.258323	0.272771	0.0144481	-0.139219	6137	0.050366	FDR 5%	NAM_JL_27	δT
αT		5_200129369	5	200129369	1.03e-08	2.45e-05	0.254821	0.258323	0.275273	0.0169497	-0.154528	5146	0.0422329	FDR 5%	NAM_JL_27	δT
αT		5_200129408	5	200129408	2.95e-09	8.19e-06	0.276171	0.258323	0.276549	0.0182261	-0.161475	4395	0.0360695	FDR 5%	NAM_JL_27	δT
αT		5_200129414	5	200129414	7.35e-08	0.000151117	0.289945	0.258323	0.273285	0.0149623	-0.141132	5926	0.0486343	FDR 5%	NAM_JL_27	δT
αT		5_200129468	5	200129468	4.95e-11	1.95e-07	0.241047	0.258323	0.280744	0.0224207	-0.194305	3096	0.0254087	FDR 5%	NAM_JL_27	δT
αT		5_200129528	5	200129528	1.57e-08	3.59e-05	0.292011	0.258323	0.274848	0.0165244	-0.145032	5339	0.0438169	FDR 5%	NAM_JL_27	δT
αT		5_200129648	5	200129648	2.35e-07	0.000447426	0.300275	0.258323	0.272111	0.0137883	-0.136595	6411	0.0526147	FDR 5%	NAM_JL_27	δT
αT		5_200129658	5	200129658	7.12e-08	0.000146794	0.330579	0.258323	0.273317	0.0149937	-0.133524	5914	0.0485359	FDR 5%	NAM_JL_27	δT
αT		5_200130305	5	200130305	2.23e-05	0.0272252	0.207989	0.258323	0.267575	0.00925201	0.121361	9978	0.0818889	FDR 5%	NAM_JL_27	δT
αT		5_200130313	5	200130313	2.23e-05	0.0272252	0.207989	0.258323	0.267575	0.00925201	0.121361	9979	0.0818971	FDR 5%	NAM_JL_27	δT
αT		5_200130333	5	200130333	2.96e-06	0.00472182	0.0757576	0.258323	0.269575	0.0112517	0.236095	7644	0.0627339	FDR 5%	NAM_JL_27	δT
αT		5_200130352	5	200130352	2.96e-06	0.00472182	0.0757576	0.258323	0.269575	0.0112517	0.236095	7645	0.0627421	FDR 5%	NAM_JL_27	δT
αT		5_200130466	5	200130466	4.11e-10	1.42e-06	0.263774	0.258323	0.278567	0.0202441	-0.173571	3538	0.0290362	FDR 5%	NAM_JL_27	δT
αT		5_200130470	5	200130470	4.22e-10	1.45e-06	0.263085	0.258323	0.278539	0.020216	-0.173709	3543	0.0290772	FDR 5%	NAM_JL_27	δT
αT		5_200130478	5	200130478	3.9e-05	0.0439572	0.210055	0.258323	0.267024	0.0087009	0.116657	10822	0.0888155	FDR 5%	NAM_JL_27	δT
αT		5_200130572	5	200130572	1.93e-11	7.87e-08	0.243802	0.258323	0.281718	0.0233945	-0.196887	2979	0.0244485	FDR 5%	NAM_JL_27	δT
αT		5_200130869	5	200130869	2.96e-06	0.00472182	0.0757576	0.258323	0.269575	0.0112517	0.236095	7646	0.0627503	FDR 5%	NAM_JL_27	δT
αT		5_200130870	5	200130870	3.9e-05	0.0439572	0.210055	0.258323	0.267024	0.0087009	0.116657	10823	0.0888237	FDR 5%	NAM_JL_27	δT
αT		5_200130936	5	200130936	2.96e-06	0.00472182	0.0757576	0.258323	0.269575	0.0112517	0.236095	7647	0.0627585	FDR 5%	NAM_JL_27	δT
αT		5_200130955	5	200130955	2.17e-05	0.0266172	0.21281	0.258323	0.267601	0.009278	0.121728	9942	0.0815934	FDR 5%	NAM_JL_27	δT
αT		5_200131294	5	200131294	1.55e-09	4.73e-06	0.266529	0.258323	0.277206	0.0188832	-0.166976	3995	0.0327867	FDR 5%	NAM_JL_27	δT
αT		5_200131306	5	200131306	2.21e-05	0.0270241	0.205923	0.258323	0.267584	0.00926067	0.122075	9964	0.081774	FDR 5%	NAM_JL_27	δT
αT		5_200131334	5	200131334	2.21e-05	0.0270241	0.205923	0.258323	0.267584	0.00926067	0.122075	9965	0.0817822	FDR 5%	NAM_JL_27	δT
αT		5_200131488	5	200131488	2.21e-05	0.0270241	0.205923	0.258323	0.267584	0.00926067	0.122075	9966	0.0817904	FDR 5%	NAM_JL_27	δT
αT		5_200131623	5	200131623	9.41e-10	2.99e-06	0.26584	0.258323	0.277719	0.0193956	-0.169594	3831	0.0314408	FDR 5%	NAM_JL_27	δT
αT		5_200132280	5	200132280	4.72e-09	1.22e-05	0.258953	0.258323	0.276072	0.0177489	-0.161864	4708	0.0386383	FDR 5%	NAM_JL_27	δT
αT		5_200132585	5	200132585	4.72e-09	1.22e-05	0.258953	0.258323	0.276072	0.0177489	-0.161864	4709	0.0386465	FDR 5%	NAM_JL_27	δT
αT		5_200132739	5	200132739	1.01e-08	2.38e-05	0.258953	0.258323	0.275301	0.0169776	-0.159444	5143	0.0422083	FDR 5%	NAM_JL_27	δT
αT		5_200133576	5	200133576	2.11e-10	7.61e-07	0.264463	0.258323	0.279249	0.020926	-0.175072	3386	0.0277887	FDR 5%	NAM_JL_27	δT
αT		5_200134415	5	200134415	1.73e-05	0.0219181	0.0743802	0.258323	0.267823	0.0094998	0.219232	9641	0.0791231	FDR 5%	NAM_JL_27	δT
αT		5_200134514	5	200134514	2.28e-11	9.27e-08	0.245868	0.258323	0.281542	0.0232188	-0.19393	2998	0.0246044	FDR 5%	NAM_JL_27	δT
αT		5_200134516	5	200134516	1.73e-05	0.0219181	0.0743802	0.258323	0.267823	0.0094998	0.219232	9642	0.0791313	FDR 5%	NAM_JL_27	δT
αT		5_200134900	5	200134900	2.96e-06	0.00472182	0.0757576	0.258323	0.269575	0.0112517	0.236095	7648	0.0627667	FDR 5%	NAM_JL_27	δT
αT		5_200134992	5	200134992	2.28e-11	9.27e-08	0.245868	0.258323	0.281542	0.0232188	-0.19393	2999	0.0246126	FDR 5%	NAM_JL_27	δT
αT		5_200135044	5	200135044	2.02e-11	8.26e-08	0.245179	0.258323	0.281667	0.0233438	-0.194802	2983	0.0244813	FDR 5%	NAM_JL_27	δT
αT		5_200135422	5	200135422	1.51e-09	4.63e-06	0.266529	0.258323	0.277237	0.0189138	-0.167177	3965	0.0325405	FDR 5%	NAM_JL_27	δT
αT		5_200135447	5	200135447	1.35e-06	0.00229961	0.0764463	0.258323	0.27036	0.0120365	0.246372	7152	0.0586961	FDR 5%	NAM_JL_27	δT
αT		5_200135573	5	200135573	2.25e-05	0.0274534	0.40427	0.258323	0.267566	0.00924326	-0.101556	9985	0.0819463	FDR 5%	NAM_JL_27	δT
αT		5_200135603	5	200135603	4.09e-06	0.00625823	0.0826446	0.258323	0.269253	0.0109303	0.224316	7971	0.0654175	FDR 5%	NAM_JL_27	δT
αT		5_200135605	5	200135605	3.05e-06	0.00485159	0.077135	0.258323	0.269545	0.0112217	0.23406	7672	0.0629637	FDR 5%	NAM_JL_27	δT
αT		5_200135606	5	200135606	1.35e-06	0.00229961	0.0764463	0.258323	0.27036	0.0120365	0.246372	7153	0.0587043	FDR 5%	NAM_JL_27	δT
αT		5_200135620	5	200135620	9.09e-11	3.43e-07	0.248623	0.258323	0.280117	0.0217938	-0.187937	3232	0.0265248	FDR 5%	NAM_JL_27	δT
αT		5_200135667	5	200135667	3.16e-09	8.69e-06	0.267218	0.258323	0.276481	0.0181578	-0.163361	4429	0.0363486	FDR 5%	NAM_JL_27	δT
αT		5_200135776	5	200135776	1.54e-05	0.0199495	0.0805785	0.258323	0.267941	0.00961802	0.209201	9398	0.0771289	FDR 5%	NAM_JL_27	δT
αT		5_200135804	5	200135804	5.69e-06	0.00827083	0.0764463	0.258323	0.268925	0.0106023	0.225722	8387	0.0688316	FDR 5%	NAM_JL_27	δT
αT		5_200135863	5	200135863	1.51e-09	4.63e-06	0.266529	0.258323	0.277237	0.0189138	-0.167177	3966	0.0325487	FDR 5%	NAM_JL_27	δT
αT		5_200135897	5	200135897	5.69e-06	0.00827083	0.0764463	0.258323	0.268925	0.0106023	0.225722	8388	0.0688398	FDR 5%	NAM_JL_27	δT
αT		5_200135944	5	200135944	2.11e-05	0.0260123	0.0778237	0.258323	0.267628	0.00930483	0.204658	9900	0.0812487	FDR 5%	NAM_JL_27	δT
αT		5_200135963	5	200135963	5.69e-06	0.00827083	0.0764463	0.258323	0.268925	0.0106023	0.225722	8389	0.068848	FDR 5%	NAM_JL_27	δT
αT		5_200135987	5	200135987	5.69e-06	0.00827083	0.0764463	0.258323	0.268925	0.0106023	0.225722	8390	0.0688563	FDR 5%	NAM_JL_27	δT
αT		5_200136314	5	200136314	2.96e-06	0.00472182	0.0757576	0.258323	0.269575	0.0112517	0.236095	7649	0.0627749	FDR 5%	NAM_JL_27	δT
αT		5_200136350	5	200136350	1.51e-09	4.63e-06	0.266529	0.258323	0.277237	0.0189138	-0.167177	3967	0.0325569	FDR 5%	NAM_JL_27	δT
αT		5_200136605	5	200136605	3.41e-06	0.00533553	0.0785124	0.258323	0.269435	0.0111116	0.227888	7792	0.0639485	FDR 5%	NAM_JL_27	δT
αT		5_200136662	5	200136662	5.29e-10	1.75e-06	0.263774	0.258323	0.278307	0.0199843	-0.172025	3689	0.0302754	FDR 5%	NAM_JL_27	δT
αT		5_200136797	5	200136797	7.6e-10	2.45e-06	0.265152	0.258323	0.277938	0.0196144	-0.170374	3773	0.0309648	FDR 5%	NAM_JL_27	δT
αT		5_200136861	5	200136861	7.6e-10	2.45e-06	0.265152	0.258323	0.277938	0.0196144	-0.170374	3774	0.030973	FDR 5%	NAM_JL_27	δT
αT		5_200136938	5	200136938	9.05e-11	3.41e-07	0.246556	0.258323	0.280121	0.0217982	-0.189015	3231	0.0265166	FDR 5%	NAM_JL_27	δT
αT		5_200137197	5	200137197	1.15e-05	0.0153702	0.0792011	0.258323	0.268229	0.00990567	0.214226	9118	0.0748309	FDR 5%	NAM_JL_27	δT
αT		5_200137228	5	200137228	2.99e-05	0.0350099	0.0826446	0.258323	0.267285	0.00896177	0.197416	10420	0.0855163	FDR 5%	NAM_JL_27	δT
αT		5_200137444	5	200137444	4.69e-10	1.56e-06	0.247934	0.258323	0.278431	0.0201083	-0.179957	3670	0.0301195	FDR 5%	NAM_JL_27	δT
αT		5_200137557	5	200137557	1e-09	3.18e-06	0.270661	0.258323	0.277652	0.0193292	-0.168309	3850	0.0315967	FDR 5%	NAM_JL_27	δT
αT		5_200137630	5	200137630	4.67e-06	0.00700983	0.0750689	0.258323	0.269123	0.0107997	0.233086	8115	0.0665993	FDR 5%	NAM_JL_27	δT
αT		5_200137778	5	200137778	1.08e-09	3.41e-06	0.267218	0.258323	0.277576	0.019253	-0.168339	3868	0.0317445	FDR 5%	NAM_JL_27	δT
αT		5_200137849	5	200137849	2.31e-09	6.61e-06	0.266529	0.258323	0.276801	0.0184775	-0.164931	4259	0.0349534	FDR 5%	NAM_JL_27	δT
αT		5_200138030	5	200138030	1.15e-05	0.0154229	0.0743802	0.258323	0.268225	0.00990152	0.224491	9125	0.0748884	FDR 5%	NAM_JL_27	δT
αT		5_200138047	5	200138047	3.71e-06	0.00574992	0.0750689	0.258323	0.269351	0.0110278	0.235055	7866	0.0645558	FDR 5%	NAM_JL_27	δT
αT		5_200138084	5	200138084	1.48e-09	4.55e-06	0.241047	0.258323	0.277256	0.0189329	-0.176288	3959	0.0324913	FDR 5%	NAM_JL_27	δT
[truncated: 70,899 more rows]
